# Supplementary material
Source: Research Square preprint supplement (doi:10.21203/rs.3.rs-9745121/v1)
Supplement: Supplementary file 1 [file 8bdfadbc4540c39775c29c40.xlsx]

## Sheet: 导航页
	SmartPLS report
	请注明使用了SmartPLS: Ringle, C. M., Wende, S., and Becker, J.-M. 2022. "SmartPLS 4." Oststeinbek: SmartPLS GmbH, http://www.smartpls.com.
		complete
	Final results
	Path coefficients	显示
	Total indirect effects	显示
	Specific indirect effects	显示
	Total effects	显示
	Outer loadings	显示
	Outer weights	显示
	Algorithm
	设定	显示
	Path coefficients (samples)	显示
	Indirect effects (samples)	显示
	Total effects (samples)	显示
	Outer loadings (samples)	显示
	Outer weights (samples)	显示
	Execution log	显示
	Model and data
	Inner model	显示
	Outer model	显示
	Indicator data (original)	显示
	Indicator data (groups)	显示

## Sheet: complete
	SmartPLS report
	请注明使用了SmartPLS: Ringle, C. M., Wende, S., and Becker, J.-M. 2022. "SmartPLS 4." Oststeinbek: SmartPLS GmbH, http://www.smartpls.com.
	返回导航页
	Final results
	Path coefficients
	Bootstrap MGA
		Difference (Group_1 - Group_2)	1-tailed (Group_1 vs Group_2) p value	2-tailed (Group_1 vs Group_2) p value
	AI Literacy -> Effort expectancy	-0.0396861	0.670922	0.658157
	AI Literacy -> Performance expectancy	0.0331794	0.355083	0.710166
	AI Literacy -> Social influence	-0.0919125	0.836706	0.326587
	Cognitive Absorption -> AI Literacy	0.100342	0.128505	0.25701
	Computing Thinking -> AI Literacy	0.150203	0.0782941	0.156588
	Digital Divide -> AI Literacy	0.30441	0.00257568	0.00515136
	Effort expectancy -> Behavioral intention to use AI	-0.198878	0.801472	0.397055
	Performance expectancy -> Behavioral intention to use AI	0.345757	0.0165004	0.0330007
	Social influence -> Behavioral intention to use AI	-0.0444353	0.575237	0.849527
	Parametric test
		Difference (Group_1 - Group_2)	t value (|Group_1 vs Group_2|)	p value (Group_1 vs Group_2)
	AI Literacy -> Effort expectancy	-0.0396861	0.454121	0.650119
	AI Literacy -> Performance expectancy	0.0331794	0.35562	0.722412
	AI Literacy -> Social influence	-0.0919125	0.999689	0.318387
	Cognitive Absorption -> AI Literacy	0.100342	1.14873	0.251719
	Computing Thinking -> AI Literacy	0.150203	1.44861	0.148646
	Digital Divide -> AI Literacy	0.30441	2.8293	0.00502728
	Effort expectancy -> Behavioral intention to use AI	-0.198878	0.782746	0.434486
	Performance expectancy -> Behavioral intention to use AI	0.345757	2.23221	0.0264499
	Social influence -> Behavioral intention to use AI	-0.0444353	0.172488	0.863188
	Welch-Satterthwaite test
		Difference (Group_1 - Group_2)	t value (|Group_1 vs Group_2|)	p value (Group_1 vs Group_2)
	AI Literacy -> Effort expectancy	-0.0396861	0.450845	0.652864
	AI Literacy -> Performance expectancy	0.0331794	0.353311	0.724436
	AI Literacy -> Social influence	-0.0919125	0.978449	0.329727
	Cognitive Absorption -> AI Literacy	0.100342	1.13842	0.257071
	Computing Thinking -> AI Literacy	0.150203	1.43583	0.15349
	Digital Divide -> AI Literacy	0.30441	2.80401	0.00583401
	Effort expectancy -> Behavioral intention to use AI	-0.198878	0.797552	0.426574
	Performance expectancy -> Behavioral intention to use AI	0.345757	2.20357	0.0293571
	Social influence -> Behavioral intention to use AI	-0.0444353	0.17588	0.86066
	Confidence intervals (bias corrected)
		2.5% (Group_1)	97.5% (Group_1)	2.5% (Group_2)	97.5% (Group_2)
	AI Literacy -> Effort expectancy	0.384205	0.654212	0.453042	0.675778
	AI Literacy -> Performance expectancy	0.338487	0.628714	0.342483	0.57853
	AI Literacy -> Social influence	0.300285	0.628974	0.481727	0.671891
	Cognitive Absorption -> AI Literacy	0.141954	0.41476	0.0709086	0.291615
	Computing Thinking -> AI Literacy	0.165573	0.490951	0.066401	0.320164
	Digital Divide -> AI Literacy	-0.460497	-0.131236	-0.734263	-0.470355
	Effort expectancy -> Behavioral intention to use AI	0.00187657	0.562325	0.0668364	0.859293
	Performance expectancy -> Behavioral intention to use AI	0.117696	0.614649	-0.139914	0.226856
	Social influence -> Behavioral intention to use AI	-0.013716	0.551189	-0.0879334	0.709273
	Bootstrapping results
		Original (Group_1)	Original (Group_2)	Mean (Group_1)	Mean (Group_2)	STDEV (Group_1)	STDEV (Group_2)	t value (Group_1)	t value (Group_2)	p value (Group_1)	p value (Group_2)
	AI Literacy -> Effort expectancy	0.536333	0.576019	0.538816	0.579251	0.0682867	0.0560859	7.85414	10.2703	5.68434e-14	5.68434e-14
	AI Literacy -> Performance expectancy	0.504452	0.471272	0.504851	0.472663	0.0724102	0.0603671	6.96659	7.80677	3.69482e-12	5.68434e-14
	AI Literacy -> Social influence	0.495055	0.586967	0.49789	0.592354	0.0809146	0.0484392	6.11824	12.1176	1.0188e-09	5.68434e-14
	Cognitive Absorption -> AI Literacy	0.285083	0.184741	0.288232	0.185823	0.0693739	0.0549235	4.10937	3.3636	4.03098e-05	0.000775124
	Computing Thinking -> AI Literacy	0.340049	0.189846	0.345434	0.19271	0.0822359	0.0653123	4.13505	2.90674	3.60707e-05	0.00366826
	Digital Divide -> AI Literacy	-0.299204	-0.603615	-0.297603	-0.602085	0.0854209	0.0676802	3.50271	8.91863	0.000464583	5.68434e-14
	Effort expectancy -> Behavioral intention to use AI	0.285248	0.484127	0.300487	0.490161	0.144429	0.204428	1.975	2.3682	0.0483226	0.0179126
	Performance expectancy -> Behavioral intention to use AI	0.388148	0.0423914	0.382263	0.0380838	0.127289	0.0927866	3.04934	0.45687	0.00230543	0.647785
	Social influence -> Behavioral intention to use AI	0.280137	0.324572	0.275492	0.328658	0.14463	0.208312	1.93692	1.5581	0.0528108	0.119272
	Total indirect effects
	Bootstrap MGA
		Difference (Group_1 - Group_2)	1-tailed (Group_1 vs Group_2) p value	2-tailed (Group_1 vs Group_2) p value
	AI Literacy -> Behavioral intention to use AI	-0.00188426	0.509986	0.980028
	Cognitive Absorption -> Behavioral intention to use AI	0.0485661	0.161709	0.323417
	Cognitive Absorption -> Effort expectancy	0.0464853	0.206709	0.413418
	Cognitive Absorption -> Performance expectancy	0.0567474	0.130822	0.261645
	Cognitive Absorption -> Social influence	0.032695	0.280761	0.561523
	Computing Thinking -> Behavioral intention to use AI	0.0728624	0.106306	0.212611
	Computing Thinking -> Effort expectancy	0.0730247	0.134219	0.268439
	Computing Thinking -> Performance expectancy	0.0820693	0.0800434	0.160087
	Computing Thinking -> Social influence	0.0569097	0.194887	0.389774
	Digital Divide -> Behavioral intention to use AI	0.149529	0.0114973	0.0229946
	Digital Divide -> Effort expectancy	0.18722	0.00447008	0.00894016
	Digital Divide -> Performance expectancy	0.133533	0.0356043	0.0712086
	Digital Divide -> Social influence	0.20618	0.001749	0.003498
	Parametric test
		Difference (Group_1 - Group_2)	t value (|Group_1 vs Group_2|)	p value (Group_1 vs Group_2)
	AI Literacy -> Behavioral intention to use AI	-0.00188426	0.024545	0.980437
	Cognitive Absorption -> Behavioral intention to use AI	0.0485661	0.995461	0.320434
	Cognitive Absorption -> Effort expectancy	0.0464853	0.824722	0.410282
	Cognitive Absorption -> Performance expectancy	0.0567474	1.13311	0.25821
	Cognitive Absorption -> Social influence	0.032695	0.594959	0.552386
	Computing Thinking -> Behavioral intention to use AI	0.0728624	1.26011	0.208755
	Computing Thinking -> Effort expectancy	0.0730247	1.12009	0.263705
	Computing Thinking -> Performance expectancy	0.0820693	1.42646	0.15493
	Computing Thinking -> Social influence	0.0569097	0.874741	0.382519
	Digital Divide -> Behavioral intention to use AI	0.149529	2.28298	0.0232361
	Digital Divide -> Effort expectancy	0.18722	2.63539	0.008907
	Digital Divide -> Performance expectancy	0.133533	1.82902	0.0685381
	Digital Divide -> Social influence	0.20618	2.91973	0.00380928
	Welch-Satterthwaite test
		Difference (Group_1 - Group_2)	t value (|Group_1 vs Group_2|)	p value (Group_1 vs Group_2)
	AI Literacy -> Behavioral intention to use AI	-0.00188426	0.024429	0.980548
	Cognitive Absorption -> Behavioral intention to use AI	0.0485661	0.984694	0.326647
	Cognitive Absorption -> Effort expectancy	0.0464853	0.81716	0.415355
	Cognitive Absorption -> Performance expectancy	0.0567474	1.11754	0.265873
	Cognitive Absorption -> Social influence	0.032695	0.590111	0.556156
	Computing Thinking -> Behavioral intention to use AI	0.0728624	1.24044	0.217099
	Computing Thinking -> Effort expectancy	0.0730247	1.10521	0.271159
	Computing Thinking -> Performance expectancy	0.0820693	1.40071	0.163738
	Computing Thinking -> Social influence	0.0569097	0.863651	0.389408
	Digital Divide -> Behavioral intention to use AI	0.149529	2.28896	0.0237073
	Digital Divide -> Effort expectancy	0.18722	2.64427	0.00920289
	Digital Divide -> Performance expectancy	0.133533	1.8334	0.0690491
	Digital Divide -> Social influence	0.20618	2.93131	0.00399405
	Confidence intervals (bias corrected)
		2.5% (Group_1)	97.5% (Group_1)	2.5% (Group_2)	97.5% (Group_2)
	AI Literacy -> Behavioral intention to use AI	0.362264	0.595026	0.375599	0.57789
	Cognitive Absorption -> Behavioral intention to use AI	0.0649121	0.22128	0.0329706	0.15082
	Cognitive Absorption -> Effort expectancy	0.0712891	0.247075	0.0405975	0.180949
	Cognitive Absorption -> Performance expectancy	0.0691759	0.23525	0.0332376	0.150892
	Cognitive Absorption -> Social influence	0.0627868	0.231381	0.0401863	0.177626
	Computing Thinking -> Behavioral intention to use AI	0.0721885	0.261068	0.0310274	0.161234
	Computing Thinking -> Effort expectancy	0.0824183	0.290522	0.0395758	0.190638
	Computing Thinking -> Performance expectancy	0.0791244	0.27309	0.032519	0.15747
	Computing Thinking -> Social influence	0.0704443	0.278118	0.0394859	0.191455
	Digital Divide -> Behavioral intention to use AI	-0.239826	-0.0607214	-0.383408	-0.205099
	Digital Divide -> Effort expectancy	-0.265768	-0.069158	-0.451224	-0.252558
	Digital Divide -> Performance expectancy	-0.259228	-0.0606223	-0.389765	-0.185734
	Digital Divide -> Social influence	-0.255314	-0.0621235	-0.453989	-0.255063
	Bootstrapping results
		Original (Group_1)	Original (Group_2)	Mean (Group_1)	Mean (Group_2)	STDEV (Group_1)	STDEV (Group_2)	t value (Group_1)	t value (Group_2)	p value (Group_1)	p value (Group_2)
	AI Literacy -> Behavioral intention to use AI	0.487473	0.489358	0.493441	0.49947	0.058575	0.0506393	8.32221	9.66359	5.68434e-14	5.68434e-14
	Cognitive Absorption -> Behavioral intention to use AI	0.13897	0.0904042	0.142533	0.0930798	0.039394	0.0299935	3.5277	3.01412	0.000422948	0.00259016
	Cognitive Absorption -> Effort expectancy	0.152899	0.106414	0.156031	0.108162	0.0448441	0.0353583	3.40958	3.00959	0.000655787	0.00262902
	Cognitive Absorption -> Performance expectancy	0.143811	0.0870631	0.145613	0.0882552	0.0414774	0.0296354	3.46721	2.93781	0.000530327	0.00332048
	Cognitive Absorption -> Social influence	0.141132	0.108437	0.143922	0.110407	0.0433142	0.0348914	3.25833	3.10784	0.0011282	0.0018952
	Computing Thinking -> Behavioral intention to use AI	0.165765	0.0929024	0.171326	0.0959297	0.0486471	0.0333276	3.4075	2.78756	0.000660787	0.00533078
	Computing Thinking -> Effort expectancy	0.18238	0.109355	0.187114	0.111358	0.0537873	0.0388159	3.39076	2.81727	0.000702403	0.00486238
	Computing Thinking -> Performance expectancy	0.171538	0.089469	0.17459	0.0906795	0.0493764	0.0319655	3.4741	2.79893	0.000516923	0.00514691
	Computing Thinking -> Social influence	0.168343	0.111433	0.173099	0.113841	0.0533951	0.0390498	3.15278	2.85362	0.00162681	0.00434018
	Digital Divide -> Behavioral intention to use AI	-0.145854	-0.295383	-0.147027	-0.300855	0.0463023	0.0464372	3.15004	6.36093	0.00164208	2.18563e-10
	Digital Divide -> Effort expectancy	-0.160473	-0.347694	-0.160158	-0.348591	0.0498006	0.0507084	3.22231	6.85673	0.00127975	7.90124e-12
	Digital Divide -> Performance expectancy	-0.150934	-0.284467	-0.151418	-0.285183	0.0517406	0.0516565	2.91713	5.5069	0.00354838	3.83573e-08
	Digital Divide -> Social influence	-0.148123	-0.354302	-0.148221	-0.356794	0.0491694	0.0506716	3.0125	6.99213	0.00260403	3.0127e-12
	Specific indirect effects
	Bootstrap MGA
		Difference (Group_1 - Group_2)	1-tailed (Group_1 vs Group_2) p value	2-tailed (Group_1 vs Group_2) p value
	Cognitive Absorption -> AI Literacy -> Effort expectancy	0.0464853	0.206709	0.413418
	Cognitive Absorption -> AI Literacy -> Performance expectancy	0.0567474	0.130822	0.261645
	Computing Thinking -> AI Literacy -> Effort expectancy	0.0730247	0.134219	0.268439
	Cognitive Absorption -> AI Literacy -> Social influence	0.032695	0.280761	0.561523
	Computing Thinking -> AI Literacy -> Performance expectancy	0.0820693	0.0800434	0.160087
	Digital Divide -> AI Literacy -> Effort expectancy	0.18722	0.00447008	0.00894016
	Computing Thinking -> AI Literacy -> Social influence	0.0569097	0.194887	0.389774
	Digital Divide -> AI Literacy -> Performance expectancy	0.133533	0.0356043	0.0712086
	Digital Divide -> AI Literacy -> Social influence	0.20618	0.001749	0.003498
	Cognitive Absorption -> AI Literacy -> Effort expectancy -> Behavioral intention to use AI	-0.0079036	0.583922	0.832157
	Cognitive Absorption -> AI Literacy -> Performance expectancy -> Behavioral intention to use AI	0.052129	0.0117172	0.0234343
	Computing Thinking -> AI Literacy -> Effort expectancy -> Behavioral intention to use AI	-0.000918087	0.517122	0.965755
	Cognitive Absorption -> AI Literacy -> Social influence -> Behavioral intention to use AI	0.00434067	0.446524	0.893048
	Computing Thinking -> AI Literacy -> Performance expectancy -> Behavioral intention to use AI	0.0627895	0.00906996	0.0181399
	Digital Divide -> AI Literacy -> Effort expectancy -> Behavioral intention to use AI	0.122553	0.0593017	0.118603
	Computing Thinking -> AI Literacy -> Social influence -> Behavioral intention to use AI	0.010991	0.389289	0.778579
	Digital Divide -> AI Literacy -> Performance expectancy -> Behavioral intention to use AI	-0.0465258	0.889157	0.221686
	Digital Divide -> AI Literacy -> Social influence -> Behavioral intention to use AI	0.0735021	0.160723	0.321445
	AI Literacy -> Social influence -> Behavioral intention to use AI	-0.0518302	0.645856	0.708288
	AI Literacy -> Performance expectancy -> Behavioral intention to use AI	0.175824	0.0164834	0.0329668
	AI Literacy -> Effort expectancy -> Behavioral intention to use AI	-0.125878	0.813698	0.372604
	Parametric test
		Difference (Group_1 - Group_2)	t value (|Group_1 vs Group_2|)	p value (Group_1 vs Group_2)
	Cognitive Absorption -> AI Literacy -> Effort expectancy	0.0464853	0.824722	0.410282
	Cognitive Absorption -> AI Literacy -> Performance expectancy	0.0567474	1.13311	0.25821
	Computing Thinking -> AI Literacy -> Effort expectancy	0.0730247	1.12009	0.263705
	Cognitive Absorption -> AI Literacy -> Social influence	0.032695	0.594959	0.552386
	Computing Thinking -> AI Literacy -> Performance expectancy	0.0820693	1.42646	0.15493
	Digital Divide -> AI Literacy -> Effort expectancy	0.18722	2.63539	0.008907
	Computing Thinking -> AI Literacy -> Social influence	0.0569097	0.874741	0.382519
	Digital Divide -> AI Literacy -> Performance expectancy	0.133533	1.82902	0.0685381
	Digital Divide -> AI Literacy -> Social influence	0.20618	2.91973	0.00380928
	Cognitive Absorption -> AI Literacy -> Effort expectancy -> Behavioral intention to use AI	-0.0079036	0.199551	0.841987
	Cognitive Absorption -> AI Literacy -> Performance expectancy -> Behavioral intention to use AI	0.052129	2.00587	0.0459018
	Computing Thinking -> AI Literacy -> Effort expectancy -> Behavioral intention to use AI	-0.000918087	0.0208445	0.983386
	Cognitive Absorption -> AI Literacy -> Social influence -> Behavioral intention to use AI	0.00434067	0.117032	0.906925
	Computing Thinking -> AI Literacy -> Performance expectancy -> Behavioral intention to use AI	0.0627895	2.07452	0.0390109
	Digital Divide -> AI Literacy -> Effort expectancy -> Behavioral intention to use AI	0.122553	1.35909	0.17529
	Computing Thinking -> AI Literacy -> Social influence -> Behavioral intention to use AI	0.010991	0.25983	0.7952
	Digital Divide -> AI Literacy -> Performance expectancy -> Behavioral intention to use AI	-0.0465258	1.17755	0.240048
	Digital Divide -> AI Literacy -> Social influence -> Behavioral intention to use AI	0.0735021	0.856395	0.392565
	AI Literacy -> Social influence -> Behavioral intention to use AI	-0.0518302	0.338357	0.735367
	AI Literacy -> Performance expectancy -> Behavioral intention to use AI	0.175824	2.11605	0.0352873
	AI Literacy -> Effort expectancy -> Behavioral intention to use AI	-0.125878	0.819158	0.413443
	Welch-Satterthwaite test
		Difference (Group_1 - Group_2)	t value (|Group_1 vs Group_2|)	p value (Group_1 vs Group_2)
	Cognitive Absorption -> AI Literacy -> Effort expectancy	0.0464853	0.81716	0.415355
	Cognitive Absorption -> AI Literacy -> Performance expectancy	0.0567474	1.11754	0.265873
	Computing Thinking -> AI Literacy -> Effort expectancy	0.0730247	1.10521	0.271159
	Cognitive Absorption -> AI Literacy -> Social influence	0.032695	0.590111	0.556156
	Computing Thinking -> AI Literacy -> Performance expectancy	0.0820693	1.40071	0.163738
	Digital Divide -> AI Literacy -> Effort expectancy	0.18722	2.64427	0.00920289
	Computing Thinking -> AI Literacy -> Social influence	0.0569097	0.863651	0.389408
	Digital Divide -> AI Literacy -> Performance expectancy	0.133533	1.8334	0.0690491
	Digital Divide -> AI Literacy -> Social influence	0.20618	2.93131	0.00399405
	Cognitive Absorption -> AI Literacy -> Effort expectancy -> Behavioral intention to use AI	-0.0079036	0.200703	0.841245
	Cognitive Absorption -> AI Literacy -> Performance expectancy -> Behavioral intention to use AI	0.052129	1.93047	0.0558316
	Computing Thinking -> AI Literacy -> Effort expectancy -> Behavioral intention to use AI	-0.000918087	0.0207917	0.983444
	Cognitive Absorption -> AI Literacy -> Social influence -> Behavioral intention to use AI	0.00434067	0.117736	0.906459
	Computing Thinking -> AI Literacy -> Performance expectancy -> Behavioral intention to use AI	0.0627895	1.99141	0.0486336
	Digital Divide -> AI Literacy -> Effort expectancy -> Behavioral intention to use AI	0.122553	1.41449	0.159538
	Computing Thinking -> AI Literacy -> Social influence -> Behavioral intention to use AI	0.010991	0.259974	0.795298
	Digital Divide -> AI Literacy -> Performance expectancy -> Behavioral intention to use AI	-0.0465258	1.17606	0.241735
	Digital Divide -> AI Literacy -> Social influence -> Behavioral intention to use AI	0.0735021	0.891459	0.374269
	AI Literacy -> Social influence -> Behavioral intention to use AI	-0.0518302	0.346717	0.729356
	AI Literacy -> Performance expectancy -> Behavioral intention to use AI	0.175824	2.07248	0.0402598
	AI Literacy -> Effort expectancy -> Behavioral intention to use AI	-0.125878	0.838355	0.403347
	Confidence intervals (bias corrected)
		2.5% (Group_1)	97.5% (Group_1)	2.5% (Group_2)	97.5% (Group_2)
	Cognitive Absorption -> AI Literacy -> Effort expectancy	0.0712891	0.247075	0.0405975	0.180949
	Cognitive Absorption -> AI Literacy -> Performance expectancy	0.0691759	0.23525	0.0332376	0.150892
	Computing Thinking -> AI Literacy -> Effort expectancy	0.0824183	0.290522	0.0395758	0.190638
	Cognitive Absorption -> AI Literacy -> Social influence	0.0627868	0.231381	0.0401863	0.177626
	Computing Thinking -> AI Literacy -> Performance expectancy	0.0791244	0.27309	0.032519	0.15747
	Digital Divide -> AI Literacy -> Effort expectancy	-0.265768	-0.069158	-0.451224	-0.252558
	Computing Thinking -> AI Literacy -> Social influence	0.0704443	0.278118	0.0394859	0.191455
	Digital Divide -> AI Literacy -> Performance expectancy	-0.259228	-0.0606223	-0.389765	-0.185734
	Digital Divide -> AI Literacy -> Social influence	-0.255314	-0.0621235	-0.453989	-0.255063
	Cognitive Absorption -> AI Literacy -> Effort expectancy -> Behavioral intention to use AI	0.00421676	0.108987	0.0109305	0.130393
	Cognitive Absorption -> AI Literacy -> Performance expectancy -> Behavioral intention to use AI	0.0177431	0.125158	-0.0114426	0.0245453
	Computing Thinking -> AI Literacy -> Effort expectancy -> Behavioral intention to use AI	0.00340741	0.129922	0.00989635	0.129086
	Cognitive Absorption -> AI Literacy -> Social influence -> Behavioral intention to use AI	0.00123973	0.103882	-0.00488993	0.102315
	Computing Thinking -> AI Literacy -> Performance expectancy -> Behavioral intention to use AI	0.0199491	0.14165	-0.0118814	0.0249156
	Digital Divide -> AI Literacy -> Effort expectancy -> Behavioral intention to use AI	-0.117885	-0.00530788	-0.354124	-0.0310047
	Computing Thinking -> AI Literacy -> Social influence -> Behavioral intention to use AI	0.000118564	0.121131	-0.00398805	0.105711
	Digital Divide -> AI Literacy -> Performance expectancy -> Behavioral intention to use AI	-0.137016	-0.0171571	-0.0678111	0.0393577
	Digital Divide -> AI Literacy -> Social influence -> Behavioral intention to use AI	-0.116381	-0.00457653	-0.272666	0.0281517
	AI Literacy -> Social influence -> Behavioral intention to use AI	-0.00251401	0.299089	-0.0528614	0.431583
	AI Literacy -> Performance expectancy -> Behavioral intention to use AI	0.0660948	0.349718	-0.0665766	0.11018
	AI Literacy -> Effort expectancy -> Behavioral intention to use AI	0.00253282	0.316088	0.0462404	0.547296
	Bootstrapping results
		Original (Group_1)	Original (Group_2)	Mean (Group_1)	Mean (Group_2)	STDEV (Group_1)	STDEV (Group_2)	t value (Group_1)	t value (Group_2)	p value (Group_1)	p value (Group_2)
	Cognitive Absorption -> AI Literacy -> Effort expectancy	0.152899	0.106414	0.156031	0.108162	0.0448441	0.0353583	3.40958	3.00959	0.000655787	0.00262902
	Cognitive Absorption -> AI Literacy -> Performance expectancy	0.143811	0.0870631	0.145613	0.0882552	0.0414774	0.0296354	3.46721	2.93781	0.000530327	0.00332048
	Computing Thinking -> AI Literacy -> Effort expectancy	0.18238	0.109355	0.187114	0.111358	0.0537873	0.0388159	3.39076	2.81727	0.000702403	0.00486238
	Cognitive Absorption -> AI Literacy -> Social influence	0.141132	0.108437	0.143922	0.110407	0.0433142	0.0348914	3.25833	3.10784	0.0011282	0.0018952
	Computing Thinking -> AI Literacy -> Performance expectancy	0.171538	0.089469	0.17459	0.0906795	0.0493764	0.0319655	3.4741	2.79893	0.000516923	0.00514691
	Digital Divide -> AI Literacy -> Effort expectancy	-0.160473	-0.347694	-0.160158	-0.348591	0.0498006	0.0507084	3.22231	6.85673	0.00127975	7.90124e-12
	Computing Thinking -> AI Literacy -> Social influence	0.168343	0.111433	0.173099	0.113841	0.0533951	0.0390498	3.15278	2.85362	0.00162681	0.00434018
	Digital Divide -> AI Literacy -> Performance expectancy	-0.150934	-0.284467	-0.151418	-0.285183	0.0517406	0.0516565	2.91713	5.5069	0.00354838	3.83573e-08
	Digital Divide -> AI Literacy -> Social influence	-0.148123	-0.354302	-0.148221	-0.356794	0.0491694	0.0506716	3.0125	6.99213	0.00260403	3.0127e-12
	Cognitive Absorption -> AI Literacy -> Effort expectancy -> Behavioral intention to use AI	0.0436143	0.0515179	0.0466913	0.052882	0.0270054	0.0288676	1.61502	1.78463	0.10637	0.074382
	Cognitive Absorption -> AI Literacy -> Performance expectancy -> Behavioral intention to use AI	0.0558198	0.00369072	0.0558579	0.00351539	0.025656	0.00876188	2.1757	0.421225	0.0296242	0.673609
	Computing Thinking -> AI Literacy -> Effort expectancy -> Behavioral intention to use AI	0.0520235	0.0529416	0.0564864	0.0540615	0.032884	0.0297236	1.58203	1.78113	0.113706	0.0749523
	Cognitive Absorption -> AI Literacy -> Social influence -> Behavioral intention to use AI	0.0395362	0.0351956	0.0399842	0.0366824	0.0252165	0.0270881	1.56787	1.2993	0.116975	0.193901
	Computing Thinking -> AI Literacy -> Performance expectancy -> Behavioral intention to use AI	0.0665822	0.00379271	0.0668313	0.00340551	0.030354	0.00898573	2.19353	0.422082	0.0283154	0.672983
	Digital Divide -> AI Literacy -> Effort expectancy -> Behavioral intention to use AI	-0.0457747	-0.168328	-0.0480101	-0.172848	0.0284069	0.0821897	1.61139	2.04804	0.107157	0.0406082
	Computing Thinking -> AI Literacy -> Social influence -> Behavioral intention to use AI	0.0471591	0.0361682	0.0480084	0.0384627	0.0305836	0.0294237	1.54198	1.22922	0.123143	0.219047
	Digital Divide -> AI Literacy -> Performance expectancy -> Behavioral intention to use AI	-0.0585848	-0.0120589	-0.0580658	-0.0107424	0.0291181	0.0270047	2.01197	0.44655	0.0442761	0.655219
	Digital Divide -> AI Literacy -> Social influence -> Behavioral intention to use AI	-0.0414947	-0.114997	-0.0409509	-0.117264	0.0267889	0.0782992	1.54895	1.46868	0.121457	0.141981
	AI Literacy -> Social influence -> Behavioral intention to use AI	0.138683	0.190513	0.13848	0.195998	0.0784578	0.127902	1.76762	1.48953	0.077186	0.136412
	AI Literacy -> Performance expectancy -> Behavioral intention to use AI	0.195802	0.0199779	0.193508	0.0178378	0.0727557	0.0442783	2.69122	0.451189	0.00714271	0.651873
	AI Literacy -> Effort expectancy -> Behavioral intention to use AI	0.152988	0.278866	0.161453	0.285634	0.0806761	0.127301	1.89632	2.1906	0.0579747	0.0285264
	Total effects
	Bootstrap MGA
		Difference (Group_1 - Group_2)	1-tailed (Group_1 vs Group_2) p value	2-tailed (Group_1 vs Group_2) p value
	AI Literacy -> Behavioral intention to use AI	-0.00188426	0.509986	0.980028
	AI Literacy -> Effort expectancy	-0.0396861	0.670922	0.658157
	AI Literacy -> Performance expectancy	0.0331794	0.355083	0.710166
	AI Literacy -> Social influence	-0.0919125	0.836706	0.326587
	Cognitive Absorption -> AI Literacy	0.100342	0.128505	0.25701
	Cognitive Absorption -> Behavioral intention to use AI	0.0485661	0.161709	0.323417
	Cognitive Absorption -> Effort expectancy	0.0464853	0.206709	0.413418
	Cognitive Absorption -> Performance expectancy	0.0567474	0.130822	0.261645
	Cognitive Absorption -> Social influence	0.032695	0.280761	0.561523
	Computing Thinking -> AI Literacy	0.150203	0.0782941	0.156588
	Computing Thinking -> Behavioral intention to use AI	0.0728624	0.106306	0.212611
	Computing Thinking -> Effort expectancy	0.0730247	0.134219	0.268439
	Computing Thinking -> Performance expectancy	0.0820693	0.0800434	0.160087
	Computing Thinking -> Social influence	0.0569097	0.194887	0.389774
	Digital Divide -> AI Literacy	0.30441	0.00257568	0.00515136
	Digital Divide -> Behavioral intention to use AI	0.149529	0.0114973	0.0229946
	Digital Divide -> Effort expectancy	0.18722	0.00447008	0.00894016
	Digital Divide -> Performance expectancy	0.133533	0.0356043	0.0712086
	Digital Divide -> Social influence	0.20618	0.001749	0.003498
	Effort expectancy -> Behavioral intention to use AI	-0.198878	0.801472	0.397055
	Performance expectancy -> Behavioral intention to use AI	0.345757	0.0165004	0.0330007
	Social influence -> Behavioral intention to use AI	-0.0444353	0.575237	0.849527
	Parametric test
		Difference (Group_1 - Group_2)	t value (|Group_1 vs Group_2|)	p value (Group_1 vs Group_2)
	AI Literacy -> Behavioral intention to use AI	-0.00188426	0.024545	0.980437
	AI Literacy -> Effort expectancy	-0.0396861	0.454121	0.650119
	AI Literacy -> Performance expectancy	0.0331794	0.35562	0.722412
	AI Literacy -> Social influence	-0.0919125	0.999689	0.318387
	Cognitive Absorption -> AI Literacy	0.100342	1.14873	0.251719
	Cognitive Absorption -> Behavioral intention to use AI	0.0485661	0.995461	0.320434
	Cognitive Absorption -> Effort expectancy	0.0464853	0.824722	0.410282
	Cognitive Absorption -> Performance expectancy	0.0567474	1.13311	0.25821
	Cognitive Absorption -> Social influence	0.032695	0.594959	0.552386
	Computing Thinking -> AI Literacy	0.150203	1.44861	0.148646
	Computing Thinking -> Behavioral intention to use AI	0.0728624	1.26011	0.208755
	Computing Thinking -> Effort expectancy	0.0730247	1.12009	0.263705
	Computing Thinking -> Performance expectancy	0.0820693	1.42646	0.15493
	Computing Thinking -> Social influence	0.0569097	0.874741	0.382519
	Digital Divide -> AI Literacy	0.30441	2.8293	0.00502728
	Digital Divide -> Behavioral intention to use AI	0.149529	2.28298	0.0232361
	Digital Divide -> Effort expectancy	0.18722	2.63539	0.008907
	Digital Divide -> Performance expectancy	0.133533	1.82902	0.0685381
	Digital Divide -> Social influence	0.20618	2.91973	0.00380928
	Effort expectancy -> Behavioral intention to use AI	-0.198878	0.782746	0.434486
	Performance expectancy -> Behavioral intention to use AI	0.345757	2.23221	0.0264499
	Social influence -> Behavioral intention to use AI	-0.0444353	0.172488	0.863188
	Welch-Satterthwaite test
		Difference (Group_1 - Group_2)	t value (|Group_1 vs Group_2|)	p value (Group_1 vs Group_2)
	AI Literacy -> Behavioral intention to use AI	-0.00188426	0.024429	0.980548
	AI Literacy -> Effort expectancy	-0.0396861	0.450845	0.652864
	AI Literacy -> Performance expectancy	0.0331794	0.353311	0.724436
	AI Literacy -> Social influence	-0.0919125	0.978449	0.329727
	Cognitive Absorption -> AI Literacy	0.100342	1.13842	0.257071
	Cognitive Absorption -> Behavioral intention to use AI	0.0485661	0.984694	0.326647
	Cognitive Absorption -> Effort expectancy	0.0464853	0.81716	0.415355
	Cognitive Absorption -> Performance expectancy	0.0567474	1.11754	0.265873
	Cognitive Absorption -> Social influence	0.032695	0.590111	0.556156
	Computing Thinking -> AI Literacy	0.150203	1.43583	0.15349
	Computing Thinking -> Behavioral intention to use AI	0.0728624	1.24044	0.217099
	Computing Thinking -> Effort expectancy	0.0730247	1.10521	0.271159
	Computing Thinking -> Performance expectancy	0.0820693	1.40071	0.163738
	Computing Thinking -> Social influence	0.0569097	0.863651	0.389408
	Digital Divide -> AI Literacy	0.30441	2.80401	0.00583401
	Digital Divide -> Behavioral intention to use AI	0.149529	2.28896	0.0237073
	Digital Divide -> Effort expectancy	0.18722	2.64427	0.00920289
	Digital Divide -> Performance expectancy	0.133533	1.8334	0.0690491
	Digital Divide -> Social influence	0.20618	2.93131	0.00399405
	Effort expectancy -> Behavioral intention to use AI	-0.198878	0.797552	0.426574
	Performance expectancy -> Behavioral intention to use AI	0.345757	2.20357	0.0293571
	Social influence -> Behavioral intention to use AI	-0.0444353	0.17588	0.86066
	Confidence intervals (bias corrected)
		2.5% (Group_1)	97.5% (Group_1)	2.5% (Group_2)	97.5% (Group_2)
	AI Literacy -> Behavioral intention to use AI	0.362264	0.595026	0.375599	0.57789
	AI Literacy -> Effort expectancy	0.384205	0.654212	0.453042	0.675778
	AI Literacy -> Performance expectancy	0.338487	0.628714	0.342483	0.57853
	AI Literacy -> Social influence	0.300285	0.628974	0.481727	0.671891
	Cognitive Absorption -> AI Literacy	0.141954	0.41476	0.0709086	0.291615
	Cognitive Absorption -> Behavioral intention to use AI	0.0649121	0.22128	0.0329706	0.15082
	Cognitive Absorption -> Effort expectancy	0.0712891	0.247075	0.0405975	0.180949
	Cognitive Absorption -> Performance expectancy	0.0691759	0.23525	0.0332376	0.150892
	Cognitive Absorption -> Social influence	0.0627868	0.231381	0.0401863	0.177626
	Computing Thinking -> AI Literacy	0.165573	0.490951	0.066401	0.320164
	Computing Thinking -> Behavioral intention to use AI	0.0721885	0.261068	0.0310274	0.161234
	Computing Thinking -> Effort expectancy	0.0824183	0.290522	0.0395758	0.190638
	Computing Thinking -> Performance expectancy	0.0791244	0.27309	0.032519	0.15747
	Computing Thinking -> Social influence	0.0704443	0.278118	0.0394859	0.191455
	Digital Divide -> AI Literacy	-0.460497	-0.131236	-0.734263	-0.470355
	Digital Divide -> Behavioral intention to use AI	-0.239826	-0.0607214	-0.383408	-0.205099
	Digital Divide -> Effort expectancy	-0.265768	-0.069158	-0.451224	-0.252558
	Digital Divide -> Performance expectancy	-0.259228	-0.0606223	-0.389765	-0.185734
	Digital Divide -> Social influence	-0.255314	-0.0621235	-0.453989	-0.255063
	Effort expectancy -> Behavioral intention to use AI	0.00187657	0.562325	0.0668364	0.859293
	Performance expectancy -> Behavioral intention to use AI	0.117696	0.614649	-0.139914	0.226856
	Social influence -> Behavioral intention to use AI	-0.013716	0.551189	-0.0879334	0.709273
	Bootstrapping results
		Original (Group_1)	Original (Group_2)	Mean (Group_1)	Mean (Group_2)	STDEV (Group_1)	STDEV (Group_2)	t value (Group_1)	t value (Group_2)	p value (Group_1)	p value (Group_2)
	AI Literacy -> Behavioral intention to use AI	0.487473	0.489358	0.493441	0.49947	0.058575	0.0506393	8.32221	9.66359	5.68434e-14	5.68434e-14
	AI Literacy -> Effort expectancy	0.536333	0.576019	0.538816	0.579251	0.0682867	0.0560859	7.85414	10.2703	5.68434e-14	5.68434e-14
	AI Literacy -> Performance expectancy	0.504452	0.471272	0.504851	0.472663	0.0724102	0.0603671	6.96659	7.80677	3.69482e-12	5.68434e-14
	AI Literacy -> Social influence	0.495055	0.586967	0.49789	0.592354	0.0809146	0.0484392	6.11824	12.1176	1.0188e-09	5.68434e-14
	Cognitive Absorption -> AI Literacy	0.285083	0.184741	0.288232	0.185823	0.0693739	0.0549235	4.10937	3.3636	4.03098e-05	0.000775124
	Cognitive Absorption -> Behavioral intention to use AI	0.13897	0.0904042	0.142533	0.0930798	0.039394	0.0299935	3.5277	3.01412	0.000422948	0.00259016
	Cognitive Absorption -> Effort expectancy	0.152899	0.106414	0.156031	0.108162	0.0448441	0.0353583	3.40958	3.00959	0.000655787	0.00262902
	Cognitive Absorption -> Performance expectancy	0.143811	0.0870631	0.145613	0.0882552	0.0414774	0.0296354	3.46721	2.93781	0.000530327	0.00332048
	Cognitive Absorption -> Social influence	0.141132	0.108437	0.143922	0.110407	0.0433142	0.0348914	3.25833	3.10784	0.0011282	0.0018952
	Computing Thinking -> AI Literacy	0.340049	0.189846	0.345434	0.19271	0.0822359	0.0653123	4.13505	2.90674	3.60707e-05	0.00366826
	Computing Thinking -> Behavioral intention to use AI	0.165765	0.0929024	0.171326	0.0959297	0.0486471	0.0333276	3.4075	2.78756	0.000660787	0.00533078
	Computing Thinking -> Effort expectancy	0.18238	0.109355	0.187114	0.111358	0.0537873	0.0388159	3.39076	2.81727	0.000702403	0.00486238
	Computing Thinking -> Performance expectancy	0.171538	0.089469	0.17459	0.0906795	0.0493764	0.0319655	3.4741	2.79893	0.000516923	0.00514691
	Computing Thinking -> Social influence	0.168343	0.111433	0.173099	0.113841	0.0533951	0.0390498	3.15278	2.85362	0.00162681	0.00434018
	Digital Divide -> AI Literacy	-0.299204	-0.603615	-0.297603	-0.602085	0.0854209	0.0676802	3.50271	8.91863	0.000464583	5.68434e-14
	Digital Divide -> Behavioral intention to use AI	-0.145854	-0.295383	-0.147027	-0.300855	0.0463023	0.0464372	3.15004	6.36093	0.00164208	2.18563e-10
	Digital Divide -> Effort expectancy	-0.160473	-0.347694	-0.160158	-0.348591	0.0498006	0.0507084	3.22231	6.85673	0.00127975	7.90124e-12
	Digital Divide -> Performance expectancy	-0.150934	-0.284467	-0.151418	-0.285183	0.0517406	0.0516565	2.91713	5.5069	0.00354838	3.83573e-08
	Digital Divide -> Social influence	-0.148123	-0.354302	-0.148221	-0.356794	0.0491694	0.0506716	3.0125	6.99213	0.00260403	3.0127e-12
	Effort expectancy -> Behavioral intention to use AI	0.285248	0.484127	0.300487	0.490161	0.144429	0.204428	1.975	2.3682	0.0483226	0.0179126
	Performance expectancy -> Behavioral intention to use AI	0.388148	0.0423914	0.382263	0.0380838	0.127289	0.0927866	3.04934	0.45687	0.00230543	0.647785
	Social influence -> Behavioral intention to use AI	0.280137	0.324572	0.275492	0.328658	0.14463	0.208312	1.93692	1.5581	0.0528108	0.119272
	Outer loadings
	Bootstrap MGA
		Difference (Group_1 - Group_2)	1-tailed (Group_1 vs Group_2) p value	2-tailed (Group_1 vs Group_2) p value
	AI Literacy1 <- AI Literacy	-0.0655314	0.767134	0.465731
	AI Literacy10 <- AI Literacy	-0.123851	0.953416	0.0931679
	AI Literacy11 <- AI Literacy	-0.0604589	0.774745	0.450511
	AI Literacy12 <- AI Literacy	0.0602918	0.238327	0.476653
	AI Literacy13 <- AI Literacy	-0.111326	0.849957	0.300087
	AI Literacy14 <- AI Literacy	-0.146452	0.975778	0.0484438
	AI Literacy15 <- AI Literacy	0.0234144	0.36644	0.732879
	AI Literacy16 <- AI Literacy	-0.041682	0.679203	0.641593
	AI Literacy17 <- AI Literacy	-0.109237	0.909278	0.181443
	AI Literacy18 <- AI Literacy	-0.0408121	0.691926	0.616147
	AI Literacy19 <- AI Literacy	-0.157614	0.978198	0.0436042
	AI Literacy2 <- AI Literacy	-0.0282637	0.623854	0.752292
	AI Literacy20 <- AI Literacy	-0.0775126	0.810128	0.379745
	AI Literacy21 <- AI Literacy	-0.113242	0.933616	0.132768
	AI Literacy22 <- AI Literacy	-0.0292068	0.635152	0.729696
	AI Literacy23 <- AI Literacy	-0.13411	0.953705	0.0925894
	AI Literacy24 <- AI Literacy	-0.0583595	0.778695	0.442611
	AI Literacy25 <- AI Literacy	-0.136194	0.929274	0.141452
	AI Literacy3 <- AI Literacy	0.0356775	0.305125	0.61025
	AI Literacy4 <- AI Literacy	0.0398366	0.331603	0.663206
	AI Literacy5 <- AI Literacy	-0.214115	0.982779	0.0344422
	AI Literacy6 <- AI Literacy	-0.211767	0.99664	0.00672088
	AI Literacy7 <- AI Literacy	-0.0998176	0.890674	0.218652
	AI Literacy8 <- AI Literacy	0.114732	0.132256	0.264511
	AI Literacy9 <- AI Literacy	-0.131165	0.92441	0.15118
	Behavioral intention to use AI1 <- Behavioral intention to use AI	-0.0501665	0.715224	0.569551
	Behavioral intention to use AI2 <- Behavioral intention to use AI	-0.133222	0.924415	0.15117
	Behavioral intention to use AI3 <- Behavioral intention to use AI	-0.0336854	0.656001	0.687999
	Cognitive Absorption1 <- Cognitive Absorption	0.0447207	0.366738	0.733475
	Cognitive Absorption10 <- Cognitive Absorption	0.1157	0.2203	0.440599
	Cognitive Absorption11 <- Cognitive Absorption	-0.216381	0.938254	0.123493
	Cognitive Absorption12 <- Cognitive Absorption	0.0943714	0.229085	0.45817
	Cognitive Absorption13 <- Cognitive Absorption	-0.24262	0.959924	0.0801524
	Cognitive Absorption14 <- Cognitive Absorption	-0.148137	0.821813	0.356375
	Cognitive Absorption15 <- Cognitive Absorption	0.00113092	0.497782	0.995564
	Cognitive Absorption16 <- Cognitive Absorption	-0.120666	0.799784	0.400432
	Cognitive Absorption17 <- Cognitive Absorption	-0.152293	0.854738	0.290525
	Cognitive Absorption18 <- Cognitive Absorption	-0.156866	0.847856	0.304287
	Cognitive Absorption19 <- Cognitive Absorption	0.0470468	0.365454	0.730907
	Cognitive Absorption2 <- Cognitive Absorption	-0.00761016	0.51651	0.96698
	Cognitive Absorption20 <- Cognitive Absorption	-0.118231	0.762112	0.475776
	Cognitive Absorption3 <- Cognitive Absorption	0.189242	0.0954278	0.190856
	Cognitive Absorption4 <- Cognitive Absorption	0.15385	0.129666	0.259333
	Cognitive Absorption5 <- Cognitive Absorption	-0.074111	0.701893	0.596215
	Cognitive Absorption6 <- Cognitive Absorption	0.165402	0.136607	0.273213
	Cognitive Absorption7 <- Cognitive Absorption	0.184545	0.117165	0.234329
	Cognitive Absorption8 <- Cognitive Absorption	-0.144446	0.784433	0.431133
	Cognitive Absorption9 <- Cognitive Absorption	-0.0586301	0.64255	0.714901
	Computing Thinking1 <- Computing Thinking	0.00463721	0.485221	0.970443
	Computing Thinking10 <- Computing Thinking	-0.019039	0.566974	0.866053
	Computing Thinking11 <- Computing Thinking	-0.120292	0.84573	0.308539
	Computing Thinking12 <- Computing Thinking	-0.0525023	0.653584	0.692831
	Computing Thinking13 <- Computing Thinking	0.1317	0.135623	0.271246
	Computing Thinking14 <- Computing Thinking	-0.176534	0.937547	0.124907
	Computing Thinking15 <- Computing Thinking	-0.145526	0.885767	0.228466
	Computing Thinking16 <- Computing Thinking	0.0381595	0.362862	0.725724
	Computing Thinking17 <- Computing Thinking	0.0295388	0.417189	0.834377
	Computing Thinking18 <- Computing Thinking	-0.171811	0.928209	0.143582
	Computing Thinking19 <- Computing Thinking	0.0130625	0.447339	0.894679
	Computing Thinking2 <- Computing Thinking	0.170468	0.0907834	0.181567
	Computing Thinking20 <- Computing Thinking	-0.0719936	0.694368	0.611265
	Computing Thinking21 <- Computing Thinking	0.00961032	0.456986	0.913972
	Computing Thinking22 <- Computing Thinking	0.113371	0.189293	0.378586
	Computing Thinking23 <- Computing Thinking	0.0246676	0.413625	0.82725
	Computing Thinking24 <- Computing Thinking	0.0735073	0.249376	0.498753
	Computing Thinking25 <- Computing Thinking	0.0256021	0.393045	0.78609
	Computing Thinking26 <- Computing Thinking	-0.0492314	0.612936	0.774129
	Computing Thinking27 <- Computing Thinking	-0.056233	0.668724	0.662553
	Computing Thinking28 <- Computing Thinking	-0.0201012	0.568627	0.862745
	Computing Thinking29 <- Computing Thinking	-0.221953	0.923909	0.152182
	Computing Thinking3 <- Computing Thinking	-0.141567	0.868155	0.26369
	Computing Thinking4 <- Computing Thinking	0.273247	0.00775048	0.015501
	Computing Thinking5 <- Computing Thinking	-0.0445082	0.620383	0.759234
	Computing Thinking6 <- Computing Thinking	0.121305	0.141419	0.282838
	Computing Thinking7 <- Computing Thinking	-0.063099	0.702438	0.595125
	Computing Thinking8 <- Computing Thinking	0.0389371	0.382345	0.764689
	Computing Thinking9 <- Computing Thinking	-0.104299	0.807334	0.385333
	Digital Divide1 <- Digital Divide	0.13583	0.117434	0.234868
	Digital Divide10 <- Digital Divide	0.0236922	0.382172	0.764343
	Digital Divide11 <- Digital Divide	0.241497	0.0196897	0.0393794
	Digital Divide12 <- Digital Divide	-0.149948	0.877044	0.245912
	Digital Divide13 <- Digital Divide	0.0788079	0.255978	0.511955
	Digital Divide14 <- Digital Divide	-0.0678802	0.692542	0.614916
	Digital Divide15 <- Digital Divide	-0.068334	0.743985	0.51203
	Digital Divide16 <- Digital Divide	-0.340897	0.998875	0.00224992
	Digital Divide17 <- Digital Divide	-0.0198466	0.566845	0.86631
	Digital Divide18 <- Digital Divide	-0.0251712	0.550234	0.899533
	Digital Divide19 <- Digital Divide	-0.134067	0.839439	0.321121
	Digital Divide2 <- Digital Divide	-0.111333	0.839704	0.320593
	Digital Divide20 <- Digital Divide	-0.0502325	0.646965	0.706069
	Digital Divide21 <- Digital Divide	-0.201951	0.944717	0.110566
	Digital Divide22 <- Digital Divide	-0.101164	0.801569	0.396861
	Digital Divide23 <- Digital Divide	-0.0866174	0.729426	0.541148
	Digital Divide24 <- Digital Divide	-0.149064	0.930367	0.139266
	Digital Divide25 <- Digital Divide	-0.0145766	0.557563	0.884874
	Digital Divide26 <- Digital Divide	-0.0718841	0.666558	0.666885
	Digital Divide27 <- Digital Divide	-0.0114434	0.513791	0.972417
	Digital Divide28 <- Digital Divide	0.00477171	0.474308	0.948615
	Digital Divide29 <- Digital Divide	-0.0105574	0.535507	0.928986
	Digital Divide3 <- Digital Divide	-0.0601308	0.677805	0.64439
	Digital Divide30 <- Digital Divide	-0.0134334	0.505876	0.988249
	Digital Divide31 <- Digital Divide	-0.161639	0.897864	0.204271
	Digital Divide32 <- Digital Divide	-0.00121904	0.479198	0.958396
	Digital Divide33 <- Digital Divide	-0.0753931	0.702877	0.594247
	Digital Divide34 <- Digital Divide	0.0470029	0.305183	0.610367
	Digital Divide35 <- Digital Divide	-0.0397059	0.638694	0.722613
	Digital Divide36 <- Digital Divide	-0.0584071	0.662293	0.675415
	Digital Divide4 <- Digital Divide	-0.057172	0.643233	0.713534
	Digital Divide5 <- Digital Divide	-0.172067	0.92279	0.154419
	Digital Divide6 <- Digital Divide	0.135819	0.10001	0.20002
	Digital Divide7 <- Digital Divide	-0.04546	0.638241	0.723519
	Digital Divide8 <- Digital Divide	-0.341968	0.982155	0.035691
	Digital Divide9 <- Digital Divide	-0.014028	0.522907	0.954186
	Effort expectancy1 <- Effort expectancy	0.0459013	0.307792	0.615584
	Effort expectancy2 <- Effort expectancy	0.0820384	0.185532	0.371063
	Effort expectancy3 <- Effort expectancy	0.0750484	0.210786	0.421573
	Effort expectancy4 <- Effort expectancy	-0.0493374	0.717009	0.565982
	Performance expectancy1 <- Performance expectancy	-0.00572922	0.533188	0.933624
	Performance expectancy2 <- Performance expectancy	0.0172679	0.429275	0.858549
	Performance expectancy3 <- Performance expectancy	-0.028312	0.641847	0.716306
	Performance expectancy4 <- Performance expectancy	0.0194686	0.390445	0.780891
	Social influence1 <- Social influence	0.219027	0.0193293	0.0386586
	Social influence2 <- Social influence	-0.00496184	0.505502	0.988997
	Social influence3 <- Social influence	-0.141467	0.898646	0.202709
	Social influence4 <- Social influence	0.0654073	0.213583	0.427166
	Parametric test
		Difference (Group_1 - Group_2)	t value (|Group_1 vs Group_2|)	p value (Group_1 vs Group_2)
	AI Literacy1 <- AI Literacy	-0.0655314	0.75089	0.453395
	AI Literacy10 <- AI Literacy	-0.123851	1.64379	0.101424
	AI Literacy11 <- AI Literacy	-0.0604589	0.771203	0.441284
	AI Literacy12 <- AI Literacy	0.0602918	0.700662	0.484138
	AI Literacy13 <- AI Literacy	-0.111326	1.04754	0.295821
	AI Literacy14 <- AI Literacy	-0.146452	1.89205	0.0595906
	AI Literacy15 <- AI Literacy	0.0234144	0.323789	0.746357
	AI Literacy16 <- AI Literacy	-0.041682	0.490578	0.624137
	AI Literacy17 <- AI Literacy	-0.109237	1.32764	0.185458
	AI Literacy18 <- AI Literacy	-0.0408121	0.507137	0.612487
	AI Literacy19 <- AI Literacy	-0.157614	1.96703	0.0502392
	AI Literacy2 <- AI Literacy	-0.0282637	0.312382	0.754999
	AI Literacy20 <- AI Literacy	-0.0775126	0.879463	0.379959
	AI Literacy21 <- AI Literacy	-0.113242	1.46173	0.145018
	AI Literacy22 <- AI Literacy	-0.0292068	0.363631	0.716428
	AI Literacy23 <- AI Literacy	-0.13411	1.59515	0.111888
	AI Literacy24 <- AI Literacy	-0.0583595	0.787882	0.431481
	AI Literacy25 <- AI Literacy	-0.136194	1.43113	0.153589
	AI Literacy3 <- AI Literacy	0.0356775	0.470634	0.638295
	AI Literacy4 <- AI Literacy	0.0398366	0.408644	0.683136
	AI Literacy5 <- AI Literacy	-0.214115	1.91798	0.0562051
	AI Literacy6 <- AI Literacy	-0.211767	2.5707	0.0107044
	AI Literacy7 <- AI Literacy	-0.0998176	1.24795	0.213166
	AI Literacy8 <- AI Literacy	0.114732	1.127	0.260776
	AI Literacy9 <- AI Literacy	-0.131165	1.42393	0.15566
	Behavioral intention to use AI1 <- Behavioral intention to use AI	-0.0501665	0.569976	0.569184
	Behavioral intention to use AI2 <- Behavioral intention to use AI	-0.133222	1.42025	0.156729
	Behavioral intention to use AI3 <- Behavioral intention to use AI	-0.0336854	0.412918	0.680006
	Cognitive Absorption1 <- Cognitive Absorption	0.0447207	0.320152	0.749109
	Cognitive Absorption10 <- Cognitive Absorption	0.1157	0.742535	0.458431
	Cognitive Absorption11 <- Cognitive Absorption	-0.216381	1.47222	0.142167
	Cognitive Absorption12 <- Cognitive Absorption	0.0943714	0.706746	0.480355
	Cognitive Absorption13 <- Cognitive Absorption	-0.24262	1.68388	0.0934013
	Cognitive Absorption14 <- Cognitive Absorption	-0.148137	0.912531	0.362331
	Cognitive Absorption15 <- Cognitive Absorption	0.00113092	0.00739215	0.994108
	Cognitive Absorption16 <- Cognitive Absorption	-0.120666	0.837963	0.402818
	Cognitive Absorption17 <- Cognitive Absorption	-0.152293	1.05114	0.294167
	Cognitive Absorption18 <- Cognitive Absorption	-0.156866	1.01492	0.311082
	Cognitive Absorption19 <- Cognitive Absorption	0.0470468	0.320228	0.749052
	Cognitive Absorption2 <- Cognitive Absorption	-0.00761016	0.0556887	0.955632
	Cognitive Absorption20 <- Cognitive Absorption	-0.118231	0.729905	0.466103
	Cognitive Absorption3 <- Cognitive Absorption	0.189242	1.29255	0.197311
	Cognitive Absorption4 <- Cognitive Absorption	0.15385	1.12331	0.262339
	Cognitive Absorption5 <- Cognitive Absorption	-0.074111	0.531849	0.595283
	Cognitive Absorption6 <- Cognitive Absorption	0.165402	1.09342	0.275219
	Cognitive Absorption7 <- Cognitive Absorption	0.184545	1.18581	0.236774
	Cognitive Absorption8 <- Cognitive Absorption	-0.144446	0.808761	0.419389
	Cognitive Absorption9 <- Cognitive Absorption	-0.0586301	0.403847	0.686656
	Computing Thinking1 <- Computing Thinking	0.00463721	0.0386061	0.969234
	Computing Thinking10 <- Computing Thinking	-0.019039	0.162586	0.87097
	Computing Thinking11 <- Computing Thinking	-0.120292	1.01032	0.313277
	Computing Thinking12 <- Computing Thinking	-0.0525023	0.412208	0.680525
	Computing Thinking13 <- Computing Thinking	0.1317	1.09101	0.276274
	Computing Thinking14 <- Computing Thinking	-0.176534	1.53181	0.12678
	Computing Thinking15 <- Computing Thinking	-0.145526	1.20455	0.229466
	Computing Thinking16 <- Computing Thinking	0.0381595	0.332647	0.739668
	Computing Thinking17 <- Computing Thinking	0.0295388	0.204935	0.837783
	Computing Thinking18 <- Computing Thinking	-0.171811	1.45403	0.14714
	Computing Thinking19 <- Computing Thinking	0.0130625	0.11417	0.909191
	Computing Thinking2 <- Computing Thinking	0.170468	1.32331	0.18689
	Computing Thinking20 <- Computing Thinking	-0.0719936	0.53184	0.595289
	Computing Thinking21 <- Computing Thinking	0.00961032	0.0713247	0.943194
	Computing Thinking22 <- Computing Thinking	0.113371	0.869005	0.385643
	Computing Thinking23 <- Computing Thinking	0.0246676	0.209379	0.834316
	Computing Thinking24 <- Computing Thinking	0.0735073	0.63758	0.524306
	Computing Thinking25 <- Computing Thinking	0.0256021	0.222052	0.824447
	Computing Thinking26 <- Computing Thinking	-0.0492314	0.325939	0.744731
	Computing Thinking27 <- Computing Thinking	-0.056233	0.434827	0.664047
	Computing Thinking28 <- Computing Thinking	-0.0201012	0.170569	0.864695
	Computing Thinking29 <- Computing Thinking	-0.221953	1.40871	0.160112
	Computing Thinking3 <- Computing Thinking	-0.141567	1.09728	0.273531
	Computing Thinking4 <- Computing Thinking	0.273247	2.44357	0.0152058
	Computing Thinking5 <- Computing Thinking	-0.0445082	0.31547	0.752657
	Computing Thinking6 <- Computing Thinking	0.121305	1.07129	0.285029
	Computing Thinking7 <- Computing Thinking	-0.063099	0.531876	0.595264
	Computing Thinking8 <- Computing Thinking	0.0389371	0.290433	0.771716
	Computing Thinking9 <- Computing Thinking	-0.104299	0.863961	0.388402
	Digital Divide1 <- Digital Divide	0.13583	1.17805	0.239848
	Digital Divide10 <- Digital Divide	0.0236922	0.255482	0.798552
	Digital Divide11 <- Digital Divide	0.241497	2.15957	0.0317169
	Digital Divide12 <- Digital Divide	-0.149948	1.11594	0.265473
	Digital Divide13 <- Digital Divide	0.0788079	0.641758	0.521594
	Digital Divide14 <- Digital Divide	-0.0678802	0.530545	0.596185
	Digital Divide15 <- Digital Divide	-0.068334	0.667899	0.504788
	Digital Divide16 <- Digital Divide	-0.340897	2.2277	0.0267534
	Digital Divide17 <- Digital Divide	-0.0198466	0.181883	0.855816
	Digital Divide18 <- Digital Divide	-0.0251712	0.21868	0.82707
	Digital Divide19 <- Digital Divide	-0.134067	0.977631	0.329162
	Digital Divide2 <- Digital Divide	-0.111333	0.987751	0.32419
	Digital Divide20 <- Digital Divide	-0.0502325	0.417912	0.676355
	Digital Divide21 <- Digital Divide	-0.201951	1.46809	0.143284
	Digital Divide22 <- Digital Divide	-0.101164	0.853396	0.394222
	Digital Divide23 <- Digital Divide	-0.0866174	0.637618	0.524281
	Digital Divide24 <- Digital Divide	-0.149064	1.42806	0.154469
	Digital Divide25 <- Digital Divide	-0.0145766	0.150812	0.88024
	Digital Divide26 <- Digital Divide	-0.0718841	0.512251	0.608909
	Digital Divide27 <- Digital Divide	-0.0114434	0.100924	0.919689
	Digital Divide28 <- Digital Divide	0.00477171	0.0399946	0.968128
	Digital Divide29 <- Digital Divide	-0.0105574	0.107037	0.914842
	Digital Divide3 <- Digital Divide	-0.0601308	0.511497	0.609436
	Digital Divide30 <- Digital Divide	-0.0134334	0.0977682	0.922191
	Digital Divide31 <- Digital Divide	-0.161639	1.22537	0.22154
	Digital Divide32 <- Digital Divide	-0.00121904	0.0106343	0.991523
	Digital Divide33 <- Digital Divide	-0.0753931	0.579718	0.562605
	Digital Divide34 <- Digital Divide	0.0470029	0.422895	0.67272
	Digital Divide35 <- Digital Divide	-0.0397059	0.329614	0.741956
	Digital Divide36 <- Digital Divide	-0.0584071	0.478828	0.632462
	Digital Divide4 <- Digital Divide	-0.057172	0.397391	0.691404
	Digital Divide5 <- Digital Divide	-0.172067	1.33969	0.181512
	Digital Divide6 <- Digital Divide	0.135819	1.25728	0.209778
	Digital Divide7 <- Digital Divide	-0.04546	0.402222	0.68785
	Digital Divide8 <- Digital Divide	-0.341968	1.78013	0.0762178
	Digital Divide9 <- Digital Divide	-0.014028	0.118973	0.905388
	Effort expectancy1 <- Effort expectancy	0.0459013	0.485978	0.627391
	Effort expectancy2 <- Effort expectancy	0.0820384	0.878408	0.38053
	Effort expectancy3 <- Effort expectancy	0.0750484	0.791152	0.429574
	Effort expectancy4 <- Effort expectancy	-0.0493374	0.576576	0.564723
	Performance expectancy1 <- Performance expectancy	-0.00572922	0.0686172	0.945347
	Performance expectancy2 <- Performance expectancy	0.0172679	0.191025	0.848655
	Performance expectancy3 <- Performance expectancy	-0.028312	0.331752	0.740343
	Performance expectancy4 <- Performance expectancy	0.0194686	0.269465	0.787785
	Social influence1 <- Social influence	0.219027	2.1063	0.0361336
	Social influence2 <- Social influence	-0.00496184	0.0517019	0.958806
	Social influence3 <- Social influence	-0.141467	1.26098	0.208441
	Social influence4 <- Social influence	0.0654073	0.773225	0.440089
	Welch-Satterthwaite test
		Difference (Group_1 - Group_2)	t value (|Group_1 vs Group_2|)	p value (Group_1 vs Group_2)
	AI Literacy1 <- AI Literacy	-0.0655314	0.732648	0.465134
	AI Literacy10 <- AI Literacy	-0.123851	1.60936	0.110041
	AI Literacy11 <- AI Literacy	-0.0604589	0.758919	0.449307
	AI Literacy12 <- AI Literacy	0.0602918	0.690898	0.49089
	AI Literacy13 <- AI Literacy	-0.111326	1.01669	0.311266
	AI Literacy14 <- AI Literacy	-0.146452	1.84243	0.0677626
	AI Literacy15 <- AI Literacy	0.0234144	0.32106	0.748689
	AI Literacy16 <- AI Literacy	-0.041682	0.476913	0.634257
	AI Literacy17 <- AI Literacy	-0.109237	1.30288	0.194974
	AI Literacy18 <- AI Literacy	-0.0408121	0.505249	0.614253
	AI Literacy19 <- AI Literacy	-0.157614	1.93143	0.0556578
	AI Literacy2 <- AI Literacy	-0.0282637	0.309464	0.757472
	AI Literacy20 <- AI Literacy	-0.0775126	0.87341	0.384075
	AI Literacy21 <- AI Literacy	-0.113242	1.43895	0.152625
	AI Literacy22 <- AI Literacy	-0.0292068	0.359809	0.719583
	AI Literacy23 <- AI Literacy	-0.13411	1.54771	0.12422
	AI Literacy24 <- AI Literacy	-0.0583595	0.769592	0.442983
	AI Literacy25 <- AI Literacy	-0.136194	1.40334	0.162976
	AI Literacy3 <- AI Literacy	0.0356775	0.464767	0.642894
	AI Literacy4 <- AI Literacy	0.0398366	0.399364	0.690301
	AI Literacy5 <- AI Literacy	-0.214115	1.85072	0.0665705
	AI Literacy6 <- AI Literacy	-0.211767	2.50052	0.0136952
	AI Literacy7 <- AI Literacy	-0.0998176	1.22046	0.22457
	AI Literacy8 <- AI Literacy	0.114732	1.11883	0.265308
	AI Literacy9 <- AI Literacy	-0.131165	1.42983	0.155183
	Behavioral intention to use AI1 <- Behavioral intention to use AI	-0.0501665	0.568285	0.570837
	Behavioral intention to use AI2 <- Behavioral intention to use AI	-0.133222	1.39675	0.164924
	Behavioral intention to use AI3 <- Behavioral intention to use AI	-0.0336854	0.408788	0.683378
	Cognitive Absorption1 <- Cognitive Absorption	0.0447207	0.316342	0.752262
	Cognitive Absorption10 <- Cognitive Absorption	0.1157	0.731509	0.465816
	Cognitive Absorption11 <- Cognitive Absorption	-0.216381	1.43448	0.153914
	Cognitive Absorption12 <- Cognitive Absorption	0.0943714	0.700647	0.484795
	Cognitive Absorption13 <- Cognitive Absorption	-0.24262	1.64942	0.101553
	Cognitive Absorption14 <- Cognitive Absorption	-0.148137	0.892726	0.373706
	Cognitive Absorption15 <- Cognitive Absorption	0.00113092	0.00728109	0.994202
	Cognitive Absorption16 <- Cognitive Absorption	-0.120666	0.822914	0.412099
	Cognitive Absorption17 <- Cognitive Absorption	-0.152293	1.03804	0.301222
	Cognitive Absorption18 <- Cognitive Absorption	-0.156866	0.99768	0.320332
	Cognitive Absorption19 <- Cognitive Absorption	0.0470468	0.315462	0.752929
	Cognitive Absorption2 <- Cognitive Absorption	-0.00761016	0.0548936	0.956309
	Cognitive Absorption20 <- Cognitive Absorption	-0.118231	0.713561	0.476819
	Cognitive Absorption3 <- Cognitive Absorption	0.189242	1.29088	0.199053
	Cognitive Absorption4 <- Cognitive Absorption	0.15385	1.10946	0.269328
	Cognitive Absorption5 <- Cognitive Absorption	-0.074111	0.52317	0.601767
	Cognitive Absorption6 <- Cognitive Absorption	0.165402	1.06888	0.287169
	Cognitive Absorption7 <- Cognitive Absorption	0.184545	1.16294	0.247052
	Cognitive Absorption8 <- Cognitive Absorption	-0.144446	0.785935	0.433393
	Cognitive Absorption9 <- Cognitive Absorption	-0.0586301	0.394792	0.693664
	Computing Thinking1 <- Computing Thinking	0.00463721	0.038276	0.969527
	Computing Thinking10 <- Computing Thinking	-0.019039	0.161103	0.872266
	Computing Thinking11 <- Computing Thinking	-0.120292	0.998177	0.320092
	Computing Thinking12 <- Computing Thinking	-0.0525023	0.405605	0.685716
	Computing Thinking13 <- Computing Thinking	0.1317	1.08557	0.279708
	Computing Thinking14 <- Computing Thinking	-0.176534	1.50177	0.135658
	Computing Thinking15 <- Computing Thinking	-0.145526	1.19185	0.235524
	Computing Thinking16 <- Computing Thinking	0.0381595	0.328264	0.743252
	Computing Thinking17 <- Computing Thinking	0.0295388	0.203743	0.838878
	Computing Thinking18 <- Computing Thinking	-0.171811	1.44266	0.15156
	Computing Thinking19 <- Computing Thinking	0.0130625	0.11261	0.910518
	Computing Thinking2 <- Computing Thinking	0.170468	1.31082	0.192266
	Computing Thinking20 <- Computing Thinking	-0.0719936	0.525072	0.600449
	Computing Thinking21 <- Computing Thinking	0.00961032	0.0703662	0.944013
	Computing Thinking22 <- Computing Thinking	0.113371	0.870905	0.385424
	Computing Thinking23 <- Computing Thinking	0.0246676	0.207436	0.835999
	Computing Thinking24 <- Computing Thinking	0.0735073	0.633761	0.527368
	Computing Thinking25 <- Computing Thinking	0.0256021	0.21965	0.826496
	Computing Thinking26 <- Computing Thinking	-0.0492314	0.318319	0.75077
	Computing Thinking27 <- Computing Thinking	-0.056233	0.432288	0.666259
	Computing Thinking28 <- Computing Thinking	-0.0201012	0.168381	0.866551
	Computing Thinking29 <- Computing Thinking	-0.221953	1.36695	0.174096
	Computing Thinking3 <- Computing Thinking	-0.141567	1.08387	0.280477
	Computing Thinking4 <- Computing Thinking	0.273247	2.42465	0.0167193
	Computing Thinking5 <- Computing Thinking	-0.0445082	0.312532	0.755145
	Computing Thinking6 <- Computing Thinking	0.121305	1.05413	0.293824
	Computing Thinking7 <- Computing Thinking	-0.063099	0.528514	0.598058
	Computing Thinking8 <- Computing Thinking	0.0389371	0.289632	0.772563
	Computing Thinking9 <- Computing Thinking	-0.104299	0.853837	0.394803
	Digital Divide1 <- Digital Divide	0.13583	1.13899	0.256886
	Digital Divide10 <- Digital Divide	0.0236922	0.247208	0.805153
	Digital Divide11 <- Digital Divide	0.241497	2.11169	0.0366885
	Digital Divide12 <- Digital Divide	-0.149948	1.07944	0.282468
	Digital Divide13 <- Digital Divide	0.0788079	0.62258	0.534695
	Digital Divide14 <- Digital Divide	-0.0678802	0.509624	0.611221
	Digital Divide15 <- Digital Divide	-0.068334	0.643911	0.520823
	Digital Divide16 <- Digital Divide	-0.340897	2.12904	0.0352449
	Digital Divide17 <- Digital Divide	-0.0198466	0.17601	0.860571
	Digital Divide18 <- Digital Divide	-0.0251712	0.210395	0.833704
	Digital Divide19 <- Digital Divide	-0.134067	0.937193	0.350481
	Digital Divide2 <- Digital Divide	-0.111333	0.949717	0.344103
	Digital Divide20 <- Digital Divide	-0.0502325	0.402732	0.687839
	Digital Divide21 <- Digital Divide	-0.201951	1.41365	0.159971
	Digital Divide22 <- Digital Divide	-0.101164	0.82343	0.411832
	Digital Divide23 <- Digital Divide	-0.0866174	0.617321	0.538146
	Digital Divide24 <- Digital Divide	-0.149064	1.37403	0.171911
	Digital Divide25 <- Digital Divide	-0.0145766	0.145706	0.884389
	Digital Divide26 <- Digital Divide	-0.0718841	0.491623	0.623855
	Digital Divide27 <- Digital Divide	-0.0114434	0.0979469	0.922131
	Digital Divide28 <- Digital Divide	0.00477171	0.0389035	0.969029
	Digital Divide29 <- Digital Divide	-0.0105574	0.103019	0.918114
	Digital Divide3 <- Digital Divide	-0.0601308	0.494893	0.621544
	Digital Divide30 <- Digital Divide	-0.0134334	0.0946623	0.924735
	Digital Divide31 <- Digital Divide	-0.161639	1.17566	0.241985
	Digital Divide32 <- Digital Divide	-0.00121904	0.0102827	0.991812
	Digital Divide33 <- Digital Divide	-0.0753931	0.559748	0.576653
	Digital Divide34 <- Digital Divide	0.0470029	0.408556	0.683565
	Digital Divide35 <- Digital Divide	-0.0397059	0.317008	0.75177
	Digital Divide36 <- Digital Divide	-0.0584071	0.461208	0.645458
	Digital Divide4 <- Digital Divide	-0.057172	0.381127	0.703761
	Digital Divide5 <- Digital Divide	-0.172067	1.29045	0.199296
	Digital Divide6 <- Digital Divide	0.135819	1.2131	0.227377
	Digital Divide7 <- Digital Divide	-0.04546	0.388211	0.69852
	Digital Divide8 <- Digital Divide	-0.341968	1.70721	0.0902863
	Digital Divide9 <- Digital Divide	-0.014028	0.114708	0.908862
	Effort expectancy1 <- Effort expectancy	0.0459013	0.484473	0.628878
	Effort expectancy2 <- Effort expectancy	0.0820384	0.892576	0.373721
	Effort expectancy3 <- Effort expectancy	0.0750484	0.791288	0.430228
	Effort expectancy4 <- Effort expectancy	-0.0493374	0.575166	0.566181
	Performance expectancy1 <- Performance expectancy	-0.00572922	0.06992	0.944364
	Performance expectancy2 <- Performance expectancy	0.0172679	0.194183	0.846334
	Performance expectancy3 <- Performance expectancy	-0.028312	0.336865	0.736758
	Performance expectancy4 <- Performance expectancy	0.0194686	0.275922	0.783039
	Social influence1 <- Social influence	0.219027	2.10527	0.0372074
	Social influence2 <- Social influence	-0.00496184	0.051017	0.959392
	Social influence3 <- Social influence	-0.141467	1.2286	0.221511
	Social influence4 <- Social influence	0.0654073	0.781725	0.435798
	Confidence intervals (bias corrected)
		2.5% (Group_1)	97.5% (Group_1)	2.5% (Group_2)	97.5% (Group_2)
	AI Literacy1 <- AI Literacy	0.61709	0.923727	0.753926	0.92185
	AI Literacy10 <- AI Literacy	0.633491	0.882148	0.810984	0.965461
	AI Literacy11 <- AI Literacy	0.606363	0.863293	0.71607	0.891569
	AI Literacy12 <- AI Literacy	0.702433	0.978196	0.678246	0.876542
	AI Literacy13 <- AI Literacy	0.435938	0.826866	0.681032	0.867392
	AI Literacy14 <- AI Literacy	0.63065	0.898868	0.854381	0.996429
	AI Literacy15 <- AI Literacy	0.70517	0.930801	0.706861	0.885077
	AI Literacy16 <- AI Literacy	0.655167	0.95594	0.767279	0.917593
	AI Literacy17 <- AI Literacy	0.538402	0.819853	0.712559	0.88809
	AI Literacy18 <- AI Literacy	0.670599	0.906189	0.732822	0.942882
	AI Literacy19 <- AI Literacy	0.541807	0.810074	0.757801	0.932636
	AI Literacy2 <- AI Literacy	0.656154	0.931897	0.693397	0.91663
	AI Literacy20 <- AI Literacy	0.564983	0.833814	0.671051	0.892607
	AI Literacy21 <- AI Literacy	0.611917	0.861212	0.77958	0.952326
	AI Literacy22 <- AI Literacy	0.647155	0.899486	0.709612	0.897544
	AI Literacy23 <- AI Literacy	0.60524	0.905053	0.83944	0.983383
	AI Literacy24 <- AI Literacy	0.688283	0.947915	0.796835	0.943778
	AI Literacy25 <- AI Literacy	0.541878	0.871234	0.769467	0.969723
	AI Literacy3 <- AI Literacy	0.701703	0.936679	0.701756	0.88392
	AI Literacy4 <- AI Literacy	0.648506	0.988041	0.687615	0.883233
	AI Literacy5 <- AI Literacy	0.37894	0.813365	0.775053	0.937397
	AI Literacy6 <- AI Literacy	0.479994	0.774861	0.780466	0.930234
	AI Literacy7 <- AI Literacy	0.620306	0.893892	0.777673	0.938392
	AI Literacy8 <- AI Literacy	0.620549	0.928174	0.529865	0.786406
	AI Literacy9 <- AI Literacy	0.585447	0.83834	0.705923	0.968765
	Behavioral intention to use AI1 <- Behavioral intention to use AI	0.606059	0.860969	0.671479	0.89934
	Behavioral intention to use AI2 <- Behavioral intention to use AI	0.418113	0.735098	0.622823	0.832373
	Behavioral intention to use AI3 <- Behavioral intention to use AI	0.589147	0.846136	0.647736	0.84799
	Cognitive Absorption1 <- Cognitive Absorption	0.549827	0.980033	0.55367	0.883421
	Cognitive Absorption10 <- Cognitive Absorption	0.500458	1.00532	0.458234	0.811952
	Cognitive Absorption11 <- Cognitive Absorption	0.473514	0.969902	0.823398	1.10195
	Cognitive Absorption12 <- Cognitive Absorption	0.636294	1.02729	0.576577	0.912936
	Cognitive Absorption13 <- Cognitive Absorption	0.567036	1.05552	0.938625	1.25412
	Cognitive Absorption14 <- Cognitive Absorption	0.278146	0.83786	0.587553	0.913732
	Cognitive Absorption15 <- Cognitive Absorption	0.67019	1.18062	0.728403	1.07605
	Cognitive Absorption16 <- Cognitive Absorption	0.545935	1.00827	0.753853	1.05929
	Cognitive Absorption17 <- Cognitive Absorption	0.324161	0.787253	0.541609	0.874478
	Cognitive Absorption18 <- Cognitive Absorption	0.312814	0.824348	0.578697	0.919848
	Cognitive Absorption19 <- Cognitive Absorption	0.612775	1.08278	0.632215	0.966783
	Cognitive Absorption2 <- Cognitive Absorption	0.643265	1.08237	0.707572	1.0254
	Cognitive Absorption20 <- Cognitive Absorption	0.298964	0.844709	0.540393	0.863575
	Cognitive Absorption3 <- Cognitive Absorption	0.723558	1.1494	0.52681	0.914471
	Cognitive Absorption4 <- Cognitive Absorption	0.710628	1.14639	0.607008	0.926633
	Cognitive Absorption5 <- Cognitive Absorption	0.480662	0.948741	0.633561	0.948449
	Cognitive Absorption6 <- Cognitive Absorption	0.673919	1.17948	0.629657	0.93017
	Cognitive Absorption7 <- Cognitive Absorption	0.68017	1.23825	0.555244	0.888174
	Cognitive Absorption8 <- Cognitive Absorption	0.323162	0.955395	0.682446	0.996003
	Cognitive Absorption9 <- Cognitive Absorption	0.508652	0.993383	0.692831	0.988301
	Computing Thinking1 <- Computing Thinking	0.62748	0.991158	0.641531	0.937165
	Computing Thinking10 <- Computing Thinking	0.726182	1.09304	0.774035	1.06418
	Computing Thinking11 <- Computing Thinking	0.507112	0.873247	0.694081	0.970014
	Computing Thinking12 <- Computing Thinking	0.570746	0.995925	0.697488	0.98327
	Computing Thinking13 <- Computing Thinking	0.760143	1.13372	0.637239	0.944919
	Computing Thinking14 <- Computing Thinking	0.489844	0.887186	0.748149	0.995213
	Computing Thinking15 <- Computing Thinking	0.530223	0.902004	0.720018	1.00794
	Computing Thinking16 <- Computing Thinking	0.639183	1.00799	0.650081	0.917952
	Computing Thinking17 <- Computing Thinking	0.688303	1.12749	0.684145	1.0552
	Computing Thinking18 <- Computing Thinking	0.547579	0.909651	0.754216	1.04909
	Computing Thinking19 <- Computing Thinking	0.639552	1.00454	0.673982	0.935363
	Computing Thinking2 <- Computing Thinking	0.75973	1.16391	0.614033	0.93443
	Computing Thinking20 <- Computing Thinking	0.395722	0.822801	0.539068	0.857546
	Computing Thinking21 <- Computing Thinking	0.427406	0.854653	0.495876	0.807225
	Computing Thinking22 <- Computing Thinking	0.626467	0.980728	0.492654	0.853813
	Computing Thinking23 <- Computing Thinking	0.552867	0.916512	0.562044	0.848954
	Computing Thinking24 <- Computing Thinking	0.696721	1.02549	0.642829	0.933628
	Computing Thinking25 <- Computing Thinking	0.602761	0.948122	0.629871	0.903362
	Computing Thinking26 <- Computing Thinking	0.377774	0.893744	0.557655	0.852589
	Computing Thinking27 <- Computing Thinking	0.486863	0.87163	0.569771	0.896095
	Computing Thinking28 <- Computing Thinking	0.615449	0.996509	0.688337	0.960303
	Computing Thinking29 <- Computing Thinking	0.277371	0.851635	0.686246	0.956819
	Computing Thinking3 <- Computing Thinking	0.35498	0.765576	0.572564	0.875085
	Computing Thinking4 <- Computing Thinking	0.820666	1.17592	0.553584	0.832905
	Computing Thinking5 <- Computing Thinking	0.446726	0.881281	0.53704	0.883442
	Computing Thinking6 <- Computing Thinking	0.747258	1.12988	0.669627	0.918699
	Computing Thinking7 <- Computing Thinking	0.651505	1.00603	0.739881	1.0414
	Computing Thinking8 <- Computing Thinking	0.592724	0.979173	0.560401	0.921251
	Computing Thinking9 <- Computing Thinking	0.481322	0.859128	0.634637	0.917152
	Digital Divide1 <- Digital Divide	0.758698	1.20761	0.723234	0.899537
	Digital Divide10 <- Digital Divide	0.717763	1.05337	0.777659	0.925459
	Digital Divide11 <- Digital Divide	0.841223	1.23991	0.640713	0.870832
	Digital Divide12 <- Digital Divide	0.326569	0.825013	0.659866	0.869869
	Digital Divide13 <- Digital Divide	0.688297	1.15093	0.706491	0.919361
	Digital Divide14 <- Digital Divide	0.549286	1.03971	0.789126	0.944542
	Digital Divide15 <- Digital Divide	0.59874	0.996979	0.802255	0.946028
	Digital Divide16 <- Digital Divide	0.215369	0.804752	0.872799	0.998962
	Digital Divide17 <- Digital Divide	0.612478	1.01663	0.7341	0.90527
	Digital Divide18 <- Digital Divide	0.552986	0.987708	0.750345	0.899583
	Digital Divide19 <- Digital Divide	0.450052	0.99276	0.806365	0.953658
	Digital Divide2 <- Digital Divide	0.604736	1.04005	0.860769	1.00258
	Digital Divide20 <- Digital Divide	0.582868	1.03545	0.786184	0.956395
	Digital Divide21 <- Digital Divide	0.315976	0.846714	0.732235	0.917249
	Digital Divide22 <- Digital Divide	0.504742	0.93662	0.760454	0.93339
	Digital Divide23 <- Digital Divide	0.447628	0.926189	0.703407	0.926567
	Digital Divide24 <- Digital Divide	0.558106	0.956439	0.851726	0.988743
	Digital Divide25 <- Digital Divide	0.693627	1.05598	0.797497	0.946843
	Digital Divide26 <- Digital Divide	0.428819	0.9476	0.739454	0.89988
	Digital Divide27 <- Digital Divide	0.615581	1.00662	0.726731	0.924261
	Digital Divide28 <- Digital Divide	0.660406	1.09919	0.74787	0.968312
	Digital Divide29 <- Digital Divide	0.738635	1.12436	0.868808	0.999244
	Digital Divide3 <- Digital Divide	0.55874	0.98703	0.769739	0.956509
	Digital Divide30 <- Digital Divide	0.492854	0.982562	0.657051	0.878712
	Digital Divide31 <- Digital Divide	0.422576	0.930897	0.792594	0.938253
	Digital Divide32 <- Digital Divide	0.56158	0.982111	0.691866	0.870762
	Digital Divide33 <- Digital Divide	0.468629	0.940346	0.709857	0.903835
	Digital Divide34 <- Digital Divide	0.661883	1.06614	0.735655	0.904533
	Digital Divide35 <- Digital Divide	0.649677	1.12887	0.814454	0.968504
	Digital Divide36 <- Digital Divide	0.536253	0.966309	0.749914	0.918117
	Digital Divide4 <- Digital Divide	0.510292	1.07951	0.783174	0.940451
	Digital Divide5 <- Digital Divide	0.388984	0.869325	0.741013	0.915976
	Digital Divide6 <- Digital Divide	0.807912	1.22092	0.765349	0.923918
	Digital Divide7 <- Digital Divide	0.540835	0.95993	0.725153	0.891005
	Digital Divide8 <- Digital Divide	-0.015579	0.725171	0.677112	0.888875
	Digital Divide9 <- Digital Divide	0.539848	0.980661	0.698403	0.868787
	Effort expectancy1 <- Effort expectancy	0.567437	0.843126	0.542633	0.792731
	Effort expectancy2 <- Effort expectancy	0.613347	0.828736	0.484286	0.778282
	Effort expectancy3 <- Effort expectancy	0.678033	0.94968	0.6149	0.871471
	Effort expectancy4 <- Effort expectancy	0.609495	0.857925	0.674613	0.899076
	Performance expectancy1 <- Performance expectancy	0.757476	0.944179	0.724311	0.98912
	Performance expectancy2 <- Performance expectancy	0.738713	0.948578	0.668583	0.954914
	Performance expectancy3 <- Performance expectancy	0.716046	0.917496	0.713914	0.97568
	Performance expectancy4 <- Performance expectancy	0.843266	0.988934	0.782375	1.0182
	Social influence1 <- Social influence	0.612443	0.909529	0.397091	0.682394
	Social influence2 <- Social influence	0.581519	0.88662	0.63718	0.862309
	Social influence3 <- Social influence	0.439993	0.848799	0.711855	0.923056
	Social influence4 <- Social influence	0.698897	0.914494	0.622796	0.872005
	Bootstrapping results
		Original (Group_1)	Original (Group_2)	Mean (Group_1)	Mean (Group_2)	STDEV (Group_1)	STDEV (Group_2)	t value (Group_1)	t value (Group_2)	p value (Group_1)	p value (Group_2)
	AI Literacy1 <- AI Literacy	0.778752	0.844283	0.772643	0.841403	0.0785958	0.0434294	9.90832	19.4403	5.68434e-14	5.68434e-14
	AI Literacy10 <- AI Literacy	0.769063	0.892914	0.760213	0.888853	0.0661542	0.0399062	11.6253	22.3753	5.68434e-14	5.68434e-14
	AI Literacy11 <- AI Literacy	0.752491	0.81295	0.744989	0.80977	0.0661301	0.0449766	11.379	18.075	5.68434e-14	5.68434e-14
	AI Literacy12 <- AI Literacy	0.846137	0.785845	0.837258	0.784813	0.0713853	0.0507828	11.8531	15.4746	5.68434e-14	5.68434e-14
	AI Literacy13 <- AI Literacy	0.674049	0.785375	0.670876	0.784238	0.0993348	0.0470912	6.78562	16.6777	1.29035e-11	5.68434e-14
	AI Literacy14 <- AI Literacy	0.77913	0.925582	0.769843	0.92108	0.0707049	0.0370016	11.0195	25.0147	5.68434e-14	5.68434e-14
	AI Literacy15 <- AI Literacy	0.827665	0.804251	0.820556	0.801553	0.057145	0.0457637	14.4836	17.574	5.68434e-14	5.68434e-14
	AI Literacy16 <- AI Literacy	0.810515	0.852197	0.800072	0.848995	0.0785268	0.0391491	10.3215	21.768	5.68434e-14	5.68434e-14
	AI Literacy17 <- AI Literacy	0.698191	0.807428	0.692585	0.804949	0.0709528	0.0452822	9.84021	17.831	5.68434e-14	5.68434e-14
	AI Literacy18 <- AI Literacy	0.803942	0.844754	0.798928	0.841193	0.0608032	0.0536488	13.222	15.746	5.68434e-14	5.68434e-14
	AI Literacy19 <- AI Literacy	0.696629	0.854242	0.692678	0.851456	0.068794	0.0444849	10.1263	19.203	5.68434e-14	5.68434e-14
	AI Literacy2 <- AI Literacy	0.796603	0.824866	0.788052	0.821738	0.0720987	0.0566391	11.0488	14.5636	5.68434e-14	5.68434e-14
	AI Literacy20 <- AI Literacy	0.716096	0.793608	0.70909	0.791662	0.0686542	0.0567778	10.4305	13.9774	5.68434e-14	5.68434e-14
	AI Literacy21 <- AI Literacy	0.756059	0.869302	0.746901	0.864892	0.065165	0.0446688	11.6022	19.461	5.68434e-14	5.68434e-14
	AI Literacy22 <- AI Literacy	0.78259	0.811797	0.773341	0.80904	0.0646792	0.0495675	12.0996	16.3776	5.68434e-14	5.68434e-14
	AI Literacy23 <- AI Literacy	0.77904	0.91315	0.768632	0.909262	0.0787434	0.0369763	9.89341	24.6955	5.68434e-14	5.68434e-14
	AI Literacy24 <- AI Literacy	0.817741	0.8761	0.811921	0.875174	0.0661716	0.037644	12.3579	23.2733	5.68434e-14	5.68434e-14
	AI Literacy25 <- AI Literacy	0.74449	0.880684	0.739451	0.876485	0.0825692	0.0517202	9.01656	17.0278	5.68434e-14	5.68434e-14
	AI Literacy3 <- AI Literacy	0.83713	0.801452	0.826321	0.799684	0.0621023	0.0456291	13.4798	17.5645	5.68434e-14	5.68434e-14
	AI Literacy4 <- AI Literacy	0.836904	0.797067	0.828716	0.794636	0.0867569	0.0500166	9.64654	15.9361	5.68434e-14	5.68434e-14
	AI Literacy5 <- AI Literacy	0.647901	0.862016	0.645046	0.858173	0.108409	0.0417002	5.97643	20.6718	2.44012e-09	5.68434e-14
	AI Literacy6 <- AI Literacy	0.647414	0.85918	0.645314	0.857048	0.0758321	0.0384503	8.53746	22.3452	5.68434e-14	5.68434e-14
	AI Literacy7 <- AI Literacy	0.764992	0.86481	0.759839	0.861349	0.0708171	0.0415532	10.8024	20.8121	5.68434e-14	5.68434e-14
	AI Literacy8 <- AI Literacy	0.786959	0.672227	0.779498	0.671353	0.0795749	0.0653081	9.88955	10.2932	5.68434e-14	5.68434e-14
	AI Literacy9 <- AI Literacy	0.728484	0.859649	0.723453	0.855196	0.0640106	0.0661996	11.3807	12.9857	5.68434e-14	5.68434e-14
	Behavioral intention to use AI1 <- Behavioral intention to use AI	0.744398	0.794565	0.737808	0.788597	0.0659994	0.0591363	11.2789	13.4361	5.68434e-14	5.68434e-14
	Behavioral intention to use AI2 <- Behavioral intention to use AI	0.603414	0.736635	0.603311	0.735902	0.0795265	0.0533297	7.58757	13.8129	5.68434e-14	5.68434e-14
	Behavioral intention to use AI3 <- Behavioral intention to use AI	0.723032	0.756718	0.717366	0.757227	0.0653939	0.0506627	11.0566	14.9364	5.68434e-14	5.68434e-14
	Cognitive Absorption1 <- Cognitive Absorption	0.763422	0.718701	0.743373	0.711387	0.113871	0.0846998	6.70424	8.48527	2.24532e-11	5.68434e-14
	Cognitive Absorption10 <- Cognitive Absorption	0.766485	0.650784	0.745298	0.643248	0.130264	0.0907929	5.88407	7.16779	4.26559e-09	8.52651e-13
	Cognitive Absorption11 <- Cognitive Absorption	0.739731	0.956112	0.7123	0.94542	0.133682	0.071152	5.53353	13.4376	3.29938e-08	5.68434e-14
	Cognitive Absorption12 <- Cognitive Absorption	0.850906	0.756535	0.829303	0.74718	0.105715	0.0843036	8.04904	8.97393	5.68434e-14	5.68434e-14
	Cognitive Absorption13 <- Cognitive Absorption	0.826433	1.06905	0.80559	1.06252	0.126036	0.0769516	6.55711	13.8925	6.04246e-11	5.68434e-14
	Cognitive Absorption14 <- Cognitive Absorption	0.61873	0.766867	0.59521	0.757408	0.14337	0.0848353	4.31562	9.03948	1.62231e-05	5.68434e-14
	Cognitive Absorption15 <- Cognitive Absorption	0.89652	0.895389	0.880035	0.890714	0.128086	0.0889244	6.99934	10.0691	2.89901e-12	5.68434e-14
	Cognitive Absorption16 <- Cognitive Absorption	0.797817	0.918484	0.775835	0.906725	0.123495	0.0801182	6.46034	11.4641	1.14539e-10	5.68434e-14
	Cognitive Absorption17 <- Cognitive Absorption	0.571265	0.723558	0.556454	0.714158	0.118683	0.087214	4.81335	8.29635	1.52803e-06	5.68434e-14
	Cognitive Absorption18 <- Cognitive Absorption	0.602869	0.759735	0.5845	0.753158	0.131517	0.0872839	4.58397	8.70419	4.67368e-06	5.68434e-14
	Cognitive Absorption19 <- Cognitive Absorption	0.849723	0.802677	0.826148	0.792047	0.122858	0.0855644	6.91629	9.38096	5.17275e-12	5.68434e-14
	Cognitive Absorption2 <- Cognitive Absorption	0.855259	0.862869	0.837529	0.856056	0.113697	0.0802668	7.52228	10.75	5.68434e-14	5.68434e-14
	Cognitive Absorption20 <- Cognitive Absorption	0.600223	0.718454	0.581679	0.710771	0.14381	0.0835959	4.17373	8.59437	3.04752e-05	5.68434e-14
	Cognitive Absorption3 <- Cognitive Absorption	0.925062	0.73582	0.905458	0.725841	0.107923	0.100048	8.57147	7.3547	5.68434e-14	1.7053e-13
	Cognitive Absorption4 <- Cognitive Absorption	0.923414	0.769564	0.901753	0.759895	0.112066	0.0825886	8.23994	9.31803	5.68434e-14	5.68434e-14
	Cognitive Absorption5 <- Cognitive Absorption	0.704009	0.77812	0.693289	0.772078	0.11792	0.0794899	5.9702	9.78891	2.53436e-09	5.68434e-14
	Cognitive Absorption6 <- Cognitive Absorption	0.93843	0.773028	0.913394	0.767912	0.134354	0.0779945	6.98475	9.91131	3.24007e-12	5.68434e-14
	Cognitive Absorption7 <- Cognitive Absorption	0.91617	0.731626	0.90579	0.72213	0.134889	0.0847616	6.79202	8.63157	1.2335e-11	5.68434e-14
	Cognitive Absorption8 <- Cognitive Absorption	0.695146	0.839592	0.668934	0.83158	0.165502	0.0815759	4.20023	10.2922	2.71288e-05	5.68434e-14
	Cognitive Absorption9 <- Cognitive Absorption	0.773426	0.832056	0.748588	0.825145	0.12892	0.0748869	5.99926	11.1108	2.12282e-09	5.68434e-14
	Computing Thinking1 <- Computing Thinking	0.801951	0.797314	0.790421	0.788828	0.0950265	0.075906	8.43924	10.504	5.68434e-14	5.68434e-14
	Computing Thinking10 <- Computing Thinking	0.890418	0.909457	0.879202	0.902316	0.0931255	0.0735018	9.56149	12.3733	5.68434e-14	5.68434e-14
	Computing Thinking11 <- Computing Thinking	0.712889	0.833181	0.695321	0.826157	0.0971609	0.0720834	7.33721	11.5586	2.84217e-13	5.68434e-14
	Computing Thinking12 <- Computing Thinking	0.797717	0.85022	0.784651	0.842218	0.107521	0.0729768	7.41919	11.6506	1.7053e-13	5.68434e-14
	Computing Thinking13 <- Computing Thinking	0.922894	0.791195	0.913991	0.781968	0.092338	0.079408	9.99474	9.96366	5.68434e-14	5.68434e-14
	Computing Thinking14 <- Computing Thinking	0.694287	0.870821	0.681183	0.863889	0.100139	0.0624397	6.9332	13.9466	4.60432e-12	5.68434e-14
	Computing Thinking15 <- Computing Thinking	0.721933	0.867459	0.708457	0.857967	0.0973155	0.074527	7.41848	11.6395	1.7053e-13	5.68434e-14
	Computing Thinking16 <- Computing Thinking	0.825428	0.787269	0.811442	0.780968	0.094552	0.0683999	8.72989	11.5098	5.68434e-14	5.68434e-14
	Computing Thinking17 <- Computing Thinking	0.894209	0.86467	0.88202	0.858169	0.111147	0.0939602	8.04525	9.20251	5.68434e-14	5.68434e-14
	Computing Thinking18 <- Computing Thinking	0.736102	0.907913	0.723644	0.900754	0.0928545	0.0753081	7.92748	12.056	5.68434e-14	5.68434e-14
	Computing Thinking19 <- Computing Thinking	0.825274	0.812212	0.810925	0.804582	0.0946965	0.0677723	8.71494	11.9844	5.68434e-14	5.68434e-14
	Computing Thinking2 <- Computing Thinking	0.938171	0.767703	0.923279	0.76257	0.102742	0.0805462	9.13129	9.53121	5.68434e-14	5.68434e-14
	Computing Thinking20 <- Computing Thinking	0.630525	0.702519	0.616144	0.696129	0.111143	0.0811999	5.67308	8.65171	1.48195e-08	5.68434e-14
	Computing Thinking21 <- Computing Thinking	0.665642	0.656032	0.654366	0.651371	0.111308	0.0800568	5.9802	8.19458	2.38475e-09	5.68434e-14
	Computing Thinking22 <- Computing Thinking	0.804832	0.691461	0.791283	0.687865	0.0926692	0.0921324	8.685	7.50508	5.68434e-14	5.68434e-14
	Computing Thinking23 <- Computing Thinking	0.737182	0.712514	0.725981	0.704031	0.0938286	0.0738057	7.85669	9.65392	5.68434e-14	5.68434e-14
	Computing Thinking24 <- Computing Thinking	0.877308	0.803801	0.858889	0.79569	0.0890493	0.0750144	9.85194	10.7153	5.68434e-14	5.68434e-14
	Computing Thinking25 <- Computing Thinking	0.799392	0.773789	0.779736	0.765797	0.0930977	0.0708832	8.58659	10.9164	5.68434e-14	5.68434e-14
	Computing Thinking26 <- Computing Thinking	0.661882	0.711113	0.643443	0.7028	0.135103	0.0765207	4.89908	9.29309	9.93337e-07	5.68434e-14
	Computing Thinking27 <- Computing Thinking	0.69399	0.750223	0.680332	0.740916	0.0997438	0.0842831	6.95773	8.90123	3.9222e-12	5.68434e-14
	Computing Thinking28 <- Computing Thinking	0.801343	0.821444	0.793248	0.812653	0.0968457	0.0705936	8.27443	11.6362	5.68434e-14	5.68434e-14
	Computing Thinking29 <- Computing Thinking	0.601892	0.823845	0.591649	0.816664	0.147472	0.0694647	4.0814	11.8599	4.54641e-05	5.68434e-14
	Computing Thinking3 <- Computing Thinking	0.594968	0.736535	0.582224	0.728672	0.105469	0.0779038	5.64114	9.45442	1.78275e-08	5.68434e-14
	Computing Thinking4 <- Computing Thinking	0.972996	0.699749	0.958322	0.694321	0.0878071	0.071335	11.0811	9.80934	5.68434e-14	5.68434e-14
	Computing Thinking5 <- Computing Thinking	0.685598	0.730106	0.674059	0.719991	0.112394	0.0883537	6.09997	8.26345	1.14136e-09	5.68434e-14
	Computing Thinking6 <- Computing Thinking	0.919361	0.798056	0.910492	0.790863	0.0955844	0.0648821	9.61831	12.3001	5.68434e-14	5.68434e-14
	Computing Thinking7 <- Computing Thinking	0.829834	0.892933	0.813922	0.885143	0.0919217	0.076907	9.02762	11.6106	5.68434e-14	5.68434e-14
	Computing Thinking8 <- Computing Thinking	0.796649	0.757711	0.784749	0.748519	0.100319	0.0902713	7.94118	8.39371	5.68434e-14	5.68434e-14
	Computing Thinking9 <- Computing Thinking	0.683377	0.787676	0.670319	0.778347	0.0982552	0.0733723	6.95513	10.7353	4.03588e-12	5.68434e-14
	Digital Divide1 <- Digital Divide	0.952082	0.816252	0.94167	0.813259	0.110554	0.0459641	8.61192	17.7585	5.68434e-14	5.68434e-14
	Digital Divide10 <- Digital Divide	0.883132	0.85944	0.86548	0.856664	0.0884531	0.03787	9.98419	22.6945	5.68434e-14	5.68434e-14
	Digital Divide11 <- Digital Divide	1.01746	0.77596	1.00331	0.772571	0.0991161	0.0579449	10.2653	13.3914	5.68434e-14	5.68434e-14
	Digital Divide12 <- Digital Divide	0.624595	0.774543	0.604586	0.771739	0.128441	0.054338	4.86288	14.2542	1.19249e-06	5.68434e-14
	Digital Divide13 <- Digital Divide	0.906899	0.828091	0.896086	0.826218	0.115131	0.0538064	7.87711	15.3902	5.68434e-14	5.68434e-14
	Digital Divide14 <- Digital Divide	0.807855	0.875736	0.786331	0.874617	0.127802	0.0393679	6.32115	22.2449	2.82455e-10	5.68434e-14
	Digital Divide15 <- Digital Divide	0.807449	0.875783	0.796875	0.873678	0.0999116	0.0370085	8.08164	23.6644	5.68434e-14	5.68434e-14
	Digital Divide16 <- Digital Divide	0.596405	0.937302	0.562176	0.936371	0.157518	0.0321212	3.78627	29.1802	0.000154721	5.68434e-14
	Digital Divide17 <- Digital Divide	0.810649	0.830496	0.795046	0.826329	0.104012	0.0446876	7.7938	18.5845	5.68434e-14	5.68434e-14
	Digital Divide18 <- Digital Divide	0.806417	0.831588	0.783744	0.829954	0.113849	0.0382864	7.08321	21.7202	1.64846e-12	5.68434e-14
	Digital Divide19 <- Digital Divide	0.755221	0.889287	0.733518	0.885975	0.138651	0.0374632	5.44692	23.7376	5.37164e-08	5.68434e-14
	Digital Divide2 <- Digital Divide	0.819792	0.931124	0.804887	0.928828	0.111927	0.0363929	7.32436	25.5853	2.84217e-13	5.68434e-14
	Digital Divide20 <- Digital Divide	0.823527	0.87376	0.80567	0.872782	0.117691	0.0427819	6.99736	20.4236	3.0127e-12	5.68434e-14
	Digital Divide21 <- Digital Divide	0.63457	0.836521	0.61184	0.836585	0.135359	0.0474279	4.68806	17.6377	2.83157e-06	5.68434e-14
	Digital Divide22 <- Digital Divide	0.75425	0.855415	0.731337	0.853233	0.115153	0.0442037	6.54999	19.3516	6.33804e-11	5.68434e-14
	Digital Divide23 <- Digital Divide	0.744491	0.831108	0.716244	0.827747	0.129086	0.0563975	5.76742	14.7366	8.53657e-09	5.68434e-14
	Digital Divide24 <- Digital Divide	0.767078	0.916141	0.753418	0.914794	0.103211	0.0347957	7.43212	26.3292	1.7053e-13	5.68434e-14
	Digital Divide25 <- Digital Divide	0.866058	0.880634	0.856089	0.877924	0.0931114	0.037658	9.3013	23.3851	5.68434e-14	5.68434e-14
	Digital Divide26 <- Digital Divide	0.752748	0.824633	0.721876	0.82362	0.140915	0.0411549	5.34185	20.0373	9.60993e-08	5.68434e-14
	Digital Divide27 <- Digital Divide	0.825139	0.836582	0.799953	0.831913	0.106016	0.0501856	7.78312	16.6698	5.68434e-14	5.68434e-14
	Digital Divide28 <- Digital Divide	0.880337	0.875566	0.866577	0.87413	0.109817	0.0557091	8.01642	15.7168	5.68434e-14	5.68434e-14
	Digital Divide29 <- Digital Divide	0.923288	0.933845	0.908403	0.930755	0.0973402	0.0333317	9.48517	28.0168	5.68434e-14	5.68434e-14
	Digital Divide3 <- Digital Divide	0.812594	0.872724	0.789275	0.87102	0.112188	0.0478975	7.24317	18.2207	5.11591e-13	5.68434e-14
	Digital Divide30 <- Digital Divide	0.77332	0.786753	0.746738	0.782857	0.130505	0.057151	5.92558	13.7662	3.32187e-09	5.68434e-14
	Digital Divide31 <- Digital Divide	0.707365	0.869004	0.686854	0.866658	0.132712	0.0379731	5.33007	22.8847	1.02507e-07	5.68434e-14
	Digital Divide32 <- Digital Divide	0.790758	0.791977	0.774717	0.790077	0.109842	0.0458398	7.19907	17.2771	7.38964e-13	5.68434e-14
	Digital Divide33 <- Digital Divide	0.746962	0.822355	0.72224	0.820887	0.125777	0.0496617	5.93878	16.5592	3.06699e-09	5.68434e-14
	Digital Divide34 <- Digital Divide	0.878761	0.831758	0.85613	0.828018	0.107105	0.0432382	8.20466	19.2367	5.68434e-14	5.68434e-14
	Digital Divide35 <- Digital Divide	0.85682	0.896526	0.851446	0.893921	0.119422	0.0393922	7.17473	22.759	8.52651e-13	5.68434e-14
	Digital Divide36 <- Digital Divide	0.785577	0.843984	0.759772	0.842531	0.119806	0.0425686	6.55708	19.8265	6.04246e-11	5.68434e-14
	Digital Divide4 <- Digital Divide	0.809802	0.866974	0.793557	0.864413	0.145064	0.0404859	5.58239	21.4142	2.49831e-08	5.68434e-14
	Digital Divide5 <- Digital Divide	0.66638	0.838447	0.645768	0.834582	0.126113	0.0449082	5.284	18.6702	1.31782e-07	5.68434e-14
	Digital Divide6 <- Digital Divide	0.988949	0.85313	0.976617	0.850052	0.10495	0.0402533	9.42304	21.1941	5.68434e-14	5.68434e-14
	Digital Divide7 <- Digital Divide	0.774076	0.819536	0.756032	0.815866	0.109587	0.0425748	7.06359	19.2493	1.87583e-12	5.68434e-14
	Digital Divide8 <- Digital Divide	0.452498	0.794465	0.419609	0.79353	0.193746	0.0539172	2.33551	14.7349	0.0195559	5.68434e-14
	Digital Divide9 <- Digital Divide	0.77884	0.792868	0.760808	0.79098	0.115088	0.0427725	6.76733	18.5369	1.46088e-11	5.68434e-14
	Effort expectancy1 <- Effort expectancy	0.71946	0.673558	0.712815	0.671042	0.0709171	0.0633771	10.1451	10.6278	5.68434e-14	5.68434e-14
	Effort expectancy2 <- Effort expectancy	0.727437	0.645399	0.727873	0.641637	0.0554676	0.0737235	13.1146	8.75432	5.68434e-14	5.68434e-14
	Effort expectancy3 <- Effort expectancy	0.825488	0.75044	0.820975	0.748376	0.0688643	0.0657436	11.9872	11.4146	5.68434e-14	5.68434e-14
	Effort expectancy4 <- Effort expectancy	0.746991	0.796329	0.742779	0.793128	0.0638294	0.057799	11.7029	13.7775	5.68434e-14	5.68434e-14
	Performance expectancy1 <- Performance expectancy	0.860646	0.866376	0.859433	0.862861	0.0474072	0.0672115	18.1543	12.8903	5.68434e-14	5.68434e-14
	Performance expectancy2 <- Performance expectancy	0.851451	0.834183	0.84705	0.832376	0.0533601	0.0715576	15.9567	11.6575	5.68434e-14	5.68434e-14
	Performance expectancy3 <- Performance expectancy	0.830971	0.859283	0.829794	0.853853	0.0512315	0.0670266	16.2199	12.82	5.68434e-14	5.68434e-14
	Performance expectancy4 <- Performance expectancy	0.922558	0.90309	0.919915	0.901001	0.0375498	0.0600493	24.569	15.0391	5.68434e-14	5.68434e-14
	Social influence1 <- Social influence	0.772221	0.553194	0.767527	0.551215	0.0760189	0.0716127	10.1583	7.72479	5.68434e-14	5.68434e-14
	Social influence2 <- Social influence	0.757073	0.762035	0.746727	0.757618	0.0791505	0.0571684	9.56498	13.3296	5.68434e-14	5.68434e-14
	Social influence3 <- Social influence	0.678751	0.820219	0.672047	0.815668	0.102072	0.0542613	6.64971	15.1161	3.25713e-11	5.68434e-14
	Social influence4 <- Social influence	0.81496	0.749553	0.809921	0.743833	0.0540272	0.064305	15.0842	11.6562	5.68434e-14	5.68434e-14
	Outer weights
	Bootstrap MGA
		Difference (Group_1 - Group_2)	1-tailed (Group_1 vs Group_2) p value	2-tailed (Group_1 vs Group_2) p value
	AI Literacy1 <- AI Literacy	0.00471017	0.221184	0.442368
	AI Literacy10 <- AI Literacy	0.00130571	0.392979	0.785958
	AI Literacy11 <- AI Literacy	0.00471331	0.147953	0.295906
	AI Literacy12 <- AI Literacy	0.0125577	0.0145062	0.0290124
	AI Literacy13 <- AI Literacy	0.000987298	0.427447	0.854894
	AI Literacy14 <- AI Literacy	0.000135747	0.499153	0.998305
	AI Literacy15 <- AI Literacy	0.0102715	0.0144839	0.0289678
	AI Literacy16 <- AI Literacy	0.00640293	0.141075	0.28215
	AI Literacy17 <- AI Literacy	0.00136645	0.386023	0.772046
	AI Literacy18 <- AI Literacy	0.0063811	0.103012	0.206024
	AI Literacy19 <- AI Literacy	-0.00138759	0.62049	0.759021
	AI Literacy2 <- AI Literacy	0.00701176	0.141299	0.282597
	AI Literacy20 <- AI Literacy	0.00335499	0.252784	0.505567
	AI Literacy21 <- AI Literacy	0.00176537	0.354679	0.709357
	AI Literacy22 <- AI Literacy	0.00680692	0.0877068	0.175414
	AI Literacy23 <- AI Literacy	0.000833105	0.427775	0.85555
	AI Literacy24 <- AI Literacy	0.00553742	0.168041	0.336081
	AI Literacy25 <- AI Literacy	0.000341696	0.467953	0.935906
	AI Literacy3 <- AI Literacy	0.0110677	0.0106786	0.0213571
	AI Literacy4 <- AI Literacy	0.0113005	0.0509867	0.101973
	AI Literacy5 <- AI Literacy	-0.00511122	0.746877	0.506245
	AI Literacy6 <- AI Literacy	-0.0049836	0.83679	0.32642
	AI Literacy7 <- AI Literacy	0.0026215	0.331795	0.66359
	AI Literacy8 <- AI Literacy	0.0149983	0.00861196	0.0172239
	AI Literacy9 <- AI Literacy	0.000453233	0.475615	0.95123
	Behavioral intention to use AI1 <- Behavioral intention to use AI	0.0356137	0.225849	0.451699
	Behavioral intention to use AI2 <- Behavioral intention to use AI	-0.0187611	0.65495	0.6901
	Behavioral intention to use AI3 <- Behavioral intention to use AI	0.0423318	0.171949	0.343899
	Cognitive Absorption1 <- Cognitive Absorption	0.00616934	0.284713	0.569426
	Cognitive Absorption10 <- Cognitive Absorption	0.0115458	0.151121	0.302242
	Cognitive Absorption11 <- Cognitive Absorption	-0.0136537	0.893326	0.213347
	Cognitive Absorption12 <- Cognitive Absorption	0.010242	0.1513	0.302599
	Cognitive Absorption13 <- Cognitive Absorption	-0.0153203	0.890367	0.219267
	Cognitive Absorption14 <- Cognitive Absorption	-0.0089372	0.770906	0.458188
	Cognitive Absorption15 <- Cognitive Absorption	0.00336065	0.422334	0.844667
	Cognitive Absorption16 <- Cognitive Absorption	-0.0062065	0.707481	0.585038
	Cognitive Absorption17 <- Cognitive Absorption	-0.00942474	0.81272	0.37456
	Cognitive Absorption18 <- Cognitive Absorption	-0.00965498	0.801415	0.39717
	Cognitive Absorption19 <- Cognitive Absorption	0.00666044	0.288991	0.577983
	Cognitive Absorption2 <- Cognitive Absorption	0.00254919	0.421851	0.843702
	Cognitive Absorption20 <- Cognitive Absorption	-0.00674421	0.704197	0.591605
	Cognitive Absorption3 <- Cognitive Absorption	0.0176841	0.0640648	0.12813
	Cognitive Absorption4 <- Cognitive Absorption	0.0150028	0.0928996	0.185799
	Cognitive Absorption5 <- Cognitive Absorption	-0.0030301	0.618152	0.763696
	Cognitive Absorption6 <- Cognitive Absorption	0.0159309	0.09907	0.19814
	Cognitive Absorption7 <- Cognitive Absorption	0.0172965	0.0987323	0.197465
	Cognitive Absorption8 <- Cognitive Absorption	-0.00837902	0.719951	0.560098
	Cognitive Absorption9 <- Cognitive Absorption	-0.00160632	0.543472	0.913056
	Computing Thinking1 <- Computing Thinking	0.00132429	0.424001	0.848002
	Computing Thinking10 <- Computing Thinking	0.000156106	0.502911	0.994177
	Computing Thinking11 <- Computing Thinking	-0.00558298	0.811442	0.377116
	Computing Thinking12 <- Computing Thinking	-0.00178612	0.594057	0.811885
	Computing Thinking13 <- Computing Thinking	0.0083901	0.132739	0.265478
	Computing Thinking14 <- Computing Thinking	-0.00866385	0.908974	0.182053
	Computing Thinking15 <- Computing Thinking	-0.00694201	0.845399	0.309203
	Computing Thinking16 <- Computing Thinking	0.00317716	0.318878	0.637756
	Computing Thinking17 <- Computing Thinking	0.00280071	0.37686	0.75372
	Computing Thinking18 <- Computing Thinking	-0.00835127	0.895492	0.209016
	Computing Thinking19 <- Computing Thinking	0.00181327	0.397165	0.794331
	Computing Thinking2 <- Computing Thinking	0.0105171	0.0751038	0.150208
	Computing Thinking20 <- Computing Thinking	-0.00306876	0.660496	0.679009
	Computing Thinking21 <- Computing Thinking	0.00141225	0.412625	0.825251
	Computing Thinking22 <- Computing Thinking	0.00723631	0.14716	0.294319
	Computing Thinking23 <- Computing Thinking	0.00232606	0.355345	0.710691
	Computing Thinking24 <- Computing Thinking	0.0051672	0.191405	0.382811
	Computing Thinking25 <- Computing Thinking	0.00246002	0.328705	0.65741
	Computing Thinking26 <- Computing Thinking	-0.00179002	0.572363	0.855273
	Computing Thinking27 <- Computing Thinking	-0.00212753	0.624804	0.750393
	Computing Thinking28 <- Computing Thinking	-2.07143e-05	0.515708	0.968585
	Computing Thinking29 <- Computing Thinking	-0.0112553	0.902142	0.195715
	Computing Thinking3 <- Computing Thinking	-0.00689668	0.86111	0.277781
	Computing Thinking4 <- Computing Thinking	0.0161482	0.0055264	0.0110528
	Computing Thinking5 <- Computing Thinking	-0.00150167	0.577992	0.844015
	Computing Thinking6 <- Computing Thinking	0.00782058	0.132666	0.265333
	Computing Thinking7 <- Computing Thinking	-0.00231895	0.633125	0.73375
	Computing Thinking8 <- Computing Thinking	0.00318093	0.338695	0.677389
	Computing Thinking9 <- Computing Thinking	-0.00475342	0.779388	0.441224
	Digital Divide1 <- Digital Divide	0.00970623	0.0277682	0.0555365
	Digital Divide10 <- Digital Divide	0.00509255	0.111883	0.223767
	Digital Divide11 <- Digital Divide	0.0140556	0.00167076	0.00334152
	Digital Divide12 <- Digital Divide	-0.00277102	0.696682	0.606635
	Digital Divide13 <- Digital Divide	0.00731218	0.100237	0.200475
	Digital Divide14 <- Digital Divide	0.00123506	0.418946	0.837892
	Digital Divide15 <- Digital Divide	0.00121579	0.420225	0.84045
	Digital Divide16 <- Digital Divide	-0.0102042	0.982845	0.0343104
	Digital Divide17 <- Digital Divide	0.00308452	0.277418	0.554836
	Digital Divide18 <- Digital Divide	0.00286091	0.255447	0.510893
	Digital Divide19 <- Digital Divide	-0.00154464	0.617252	0.765495
	Digital Divide2 <- Digital Divide	-0.000369451	0.554334	0.891331
	Digital Divide20 <- Digital Divide	0.00198399	0.366332	0.732665
	Digital Divide21 <- Digital Divide	-0.00471172	0.798762	0.402476
	Digital Divide22 <- Digital Divide	-0.000291463	0.513645	0.972711
	Digital Divide23 <- Digital Divide	0.000218367	0.448262	0.896525
	Digital Divide24 <- Digital Divide	-0.00206173	0.690165	0.61967
	Digital Divide25 <- Digital Divide	0.00354867	0.244868	0.489736
	Digital Divide26 <- Digital Divide	0.000820739	0.387378	0.774755
	Digital Divide27 <- Digital Divide	0.00347445	0.212451	0.424903
	Digital Divide28 <- Digital Divide	0.00435601	0.222802	0.445603
	Digital Divide29 <- Digital Divide	0.00397364	0.222649	0.445299
	Digital Divide3 <- Digital Divide	0.00155376	0.363648	0.727296
	Digital Divide30 <- Digital Divide	0.00315271	0.24342	0.48684
	Digital Divide31 <- Digital Divide	-0.00282556	0.69841	0.603181
	Digital Divide32 <- Digital Divide	0.00370231	0.214233	0.428466
	Digital Divide33 <- Digital Divide	0.000659167	0.426231	0.852462
	Digital Divide34 <- Digital Divide	0.00596294	0.0894218	0.178844
	Digital Divide35 <- Digital Divide	0.00254424	0.385073	0.770146
	Digital Divide36 <- Digital Divide	0.00149157	0.356345	0.712691
	Digital Divide4 <- Digital Divide	0.00165363	0.418375	0.83675
	Digital Divide5 <- Digital Divide	-0.00341851	0.748769	0.502462
	Digital Divide6 <- Digital Divide	0.00988057	0.0229636	0.0459271
	Digital Divide7 <- Digital Divide	0.00193199	0.33639	0.67278
	Digital Divide8 <- Digital Divide	-0.0109274	0.944121	0.111758
	Digital Divide9 <- Digital Divide	0.00315615	0.259605	0.519211
	Effort expectancy1 <- Effort expectancy	-0.00495502	0.547802	0.904396
	Effort expectancy2 <- Effort expectancy	0.010549	0.398907	0.797813
	Effort expectancy3 <- Effort expectancy	0.00408931	0.458106	0.916213
	Effort expectancy4 <- Effort expectancy	-0.0475029	0.920875	0.15825
	Performance expectancy1 <- Performance expectancy	-0.00227139	0.536874	0.926252
	Performance expectancy2 <- Performance expectancy	0.00510019	0.424022	0.848044
	Performance expectancy3 <- Performance expectancy	-0.00949054	0.647949	0.704102
	Performance expectancy4 <- Performance expectancy	0.00576913	0.399876	0.799751
	Social influence1 <- Social influence	0.0720396	0.0372924	0.0745849
	Social influence2 <- Social influence	-0.0237209	0.751182	0.497636
	Social influence3 <- Social influence	-0.0801099	0.971758	0.0564844
	Social influence4 <- Social influence	0.00484845	0.454938	0.909876
	Parametric test
		Difference (Group_1 - Group_2)	t value (|Group_1 vs Group_2|)	p value (Group_1 vs Group_2)
	AI Literacy1 <- AI Literacy	0.00471017	0.791735	0.429234
	AI Literacy10 <- AI Literacy	0.00130571	0.282001	0.778166
	AI Literacy11 <- AI Literacy	0.00471331	1.03853	0.299983
	AI Literacy12 <- AI Literacy	0.0125577	2.11652	0.0352469
	AI Literacy13 <- AI Literacy	0.000987298	0.145484	0.884441
	AI Literacy14 <- AI Literacy	0.000135747	0.025339	0.979804
	AI Literacy15 <- AI Literacy	0.0102715	2.09329	0.037289
	AI Literacy16 <- AI Literacy	0.00640293	1.07239	0.284537
	AI Literacy17 <- AI Literacy	0.00136645	0.289204	0.772655
	AI Literacy18 <- AI Literacy	0.0063811	1.2453	0.214139
	AI Literacy19 <- AI Literacy	-0.00138759	0.296536	0.767056
	AI Literacy2 <- AI Literacy	0.00701176	1.06186	0.28928
	AI Literacy20 <- AI Literacy	0.00335499	0.662414	0.508291
	AI Literacy21 <- AI Literacy	0.00176537	0.368782	0.71259
	AI Literacy22 <- AI Literacy	0.00680692	1.34276	0.180515
	AI Literacy23 <- AI Literacy	0.000833105	0.162787	0.870812
	AI Literacy24 <- AI Literacy	0.00553742	0.970349	0.332771
	AI Literacy25 <- AI Literacy	0.000341696	0.0574186	0.954256
	AI Literacy3 <- AI Literacy	0.0110677	2.27141	0.023937
	AI Literacy4 <- AI Literacy	0.0113005	1.62318	0.105759
	AI Literacy5 <- AI Literacy	-0.00511122	0.700416	0.484292
	AI Literacy6 <- AI Literacy	-0.0049836	0.987844	0.324144
	AI Literacy7 <- AI Literacy	0.0026215	0.475049	0.635149
	AI Literacy8 <- AI Literacy	0.0149983	2.33206	0.0204585
	AI Literacy9 <- AI Literacy	0.000453233	0.0832617	0.933707
	Behavioral intention to use AI1 <- Behavioral intention to use AI	0.0356137	0.756239	0.450188
	Behavioral intention to use AI2 <- Behavioral intention to use AI	-0.0187611	0.415812	0.677889
	Behavioral intention to use AI3 <- Behavioral intention to use AI	0.0423318	0.952746	0.3416
	Cognitive Absorption1 <- Cognitive Absorption	0.00616934	0.56256	0.574217
	Cognitive Absorption10 <- Cognitive Absorption	0.0115458	1.00721	0.314766
	Cognitive Absorption11 <- Cognitive Absorption	-0.0136537	1.1996	0.231382
	Cognitive Absorption12 <- Cognitive Absorption	0.010242	1.01699	0.310099
	Cognitive Absorption13 <- Cognitive Absorption	-0.0153203	1.1991	0.231575
	Cognitive Absorption14 <- Cognitive Absorption	-0.0089372	0.736804	0.461903
	Cognitive Absorption15 <- Cognitive Absorption	0.00336065	0.234922	0.814454
	Cognitive Absorption16 <- Cognitive Absorption	-0.0062065	0.53245	0.594867
	Cognitive Absorption17 <- Cognitive Absorption	-0.00942474	0.874972	0.382393
	Cognitive Absorption18 <- Cognitive Absorption	-0.00965498	0.83229	0.406006
	Cognitive Absorption19 <- Cognitive Absorption	0.00666044	0.551911	0.581482
	Cognitive Absorption2 <- Cognitive Absorption	0.00254919	0.218595	0.827137
	Cognitive Absorption20 <- Cognitive Absorption	-0.00674421	0.549894	0.582862
	Cognitive Absorption3 <- Cognitive Absorption	0.0176841	1.45685	0.14636
	Cognitive Absorption4 <- Cognitive Absorption	0.0150028	1.28557	0.199734
	Cognitive Absorption5 <- Cognitive Absorption	-0.0030301	0.259565	0.795404
	Cognitive Absorption6 <- Cognitive Absorption	0.0159309	1.26594	0.206662
	Cognitive Absorption7 <- Cognitive Absorption	0.0172965	1.19789	0.232047
	Cognitive Absorption8 <- Cognitive Absorption	-0.00837902	0.5999	0.549093
	Cognitive Absorption9 <- Cognitive Absorption	-0.00160632	0.137971	0.89037
	Computing Thinking1 <- Computing Thinking	0.00132429	0.200437	0.841295
	Computing Thinking10 <- Computing Thinking	0.000156106	0.0202124	0.983889
	Computing Thinking11 <- Computing Thinking	-0.00558298	0.876934	0.381329
	Computing Thinking12 <- Computing Thinking	-0.00178612	0.232949	0.815984
	Computing Thinking13 <- Computing Thinking	0.0083901	1.08433	0.27922
	Computing Thinking14 <- Computing Thinking	-0.00866385	1.32084	0.187711
	Computing Thinking15 <- Computing Thinking	-0.00694201	1.01048	0.313201
	Computing Thinking16 <- Computing Thinking	0.00317716	0.47315	0.636501
	Computing Thinking17 <- Computing Thinking	0.00280071	0.316904	0.75157
	Computing Thinking18 <- Computing Thinking	-0.00835127	1.23747	0.217026
	Computing Thinking19 <- Computing Thinking	0.00181327	0.267162	0.789556
	Computing Thinking2 <- Computing Thinking	0.0105171	1.40112	0.162365
	Computing Thinking20 <- Computing Thinking	-0.00306876	0.432711	0.665582
	Computing Thinking21 <- Computing Thinking	0.00141225	0.193288	0.846884
	Computing Thinking22 <- Computing Thinking	0.00723631	1.03083	0.303576
	Computing Thinking23 <- Computing Thinking	0.00232606	0.374444	0.708378
	Computing Thinking24 <- Computing Thinking	0.0051672	0.846052	0.398299
	Computing Thinking25 <- Computing Thinking	0.00246002	0.403711	0.686756
	Computing Thinking26 <- Computing Thinking	-0.00179002	0.226021	0.821362
	Computing Thinking27 <- Computing Thinking	-0.00212753	0.313872	0.753869
	Computing Thinking28 <- Computing Thinking	-2.07143e-05	0.00293297	0.997662
	Computing Thinking29 <- Computing Thinking	-0.0112553	1.2733	0.204044
	Computing Thinking3 <- Computing Thinking	-0.00689668	1.05259	0.293504
	Computing Thinking4 <- Computing Thinking	0.0161482	2.42284	0.0160808
	Computing Thinking5 <- Computing Thinking	-0.00150167	0.203877	0.838608
	Computing Thinking6 <- Computing Thinking	0.00782058	1.07951	0.281357
	Computing Thinking7 <- Computing Thinking	-0.00231895	0.3397	0.734356
	Computing Thinking8 <- Computing Thinking	0.00318093	0.417826	0.676418
	Computing Thinking9 <- Computing Thinking	-0.00475342	0.760769	0.447482
	Digital Divide1 <- Digital Divide	0.00970623	1.59327	0.11231
	Digital Divide10 <- Digital Divide	0.00509255	1.12421	0.261956
	Digital Divide11 <- Digital Divide	0.0140556	2.46044	0.0145248
	Digital Divide12 <- Digital Divide	-0.00277102	0.508224	0.611726
	Digital Divide13 <- Digital Divide	0.00731218	1.15108	0.250754
	Digital Divide14 <- Digital Divide	0.00123506	0.217464	0.828016
	Digital Divide15 <- Digital Divide	0.00121579	0.250334	0.802526
	Digital Divide16 <- Digital Divide	-0.0102042	1.62915	0.104487
	Digital Divide17 <- Digital Divide	0.00308452	0.606129	0.544956
	Digital Divide18 <- Digital Divide	0.00286091	0.604383	0.546114
	Digital Divide19 <- Digital Divide	-0.00154464	0.25696	0.797412
	Digital Divide2 <- Digital Divide	-0.000369451	0.0669803	0.946649
	Digital Divide20 <- Digital Divide	0.00198399	0.355563	0.722455
	Digital Divide21 <- Digital Divide	-0.00471172	0.812153	0.417444
	Digital Divide22 <- Digital Divide	-0.000291463	0.0591694	0.952862
	Digital Divide23 <- Digital Divide	0.000218367	0.041625	0.966829
	Digital Divide24 <- Digital Divide	-0.00206173	0.429848	0.667661
	Digital Divide25 <- Digital Divide	0.00354867	0.719814	0.472284
	Digital Divide26 <- Digital Divide	0.000820739	0.148911	0.881739
	Digital Divide27 <- Digital Divide	0.00347445	0.745862	0.456422
	Digital Divide28 <- Digital Divide	0.00435601	0.764113	0.44549
	Digital Divide29 <- Digital Divide	0.00397364	0.742058	0.45872
	Digital Divide3 <- Digital Divide	0.00155376	0.313653	0.754035
	Digital Divide30 <- Digital Divide	0.00315271	0.594882	0.552438
	Digital Divide31 <- Digital Divide	-0.00282556	0.502322	0.615864
	Digital Divide32 <- Digital Divide	0.00370231	0.744826	0.457047
	Digital Divide33 <- Digital Divide	0.000659167	0.128343	0.897977
	Digital Divide34 <- Digital Divide	0.00596294	1.26134	0.208313
	Digital Divide35 <- Digital Divide	0.00254424	0.385719	0.700019
	Digital Divide36 <- Digital Divide	0.00149157	0.301194	0.763507
	Digital Divide4 <- Digital Divide	0.00165363	0.23632	0.813369
	Digital Divide5 <- Digital Divide	-0.00341851	0.643043	0.520761
	Digital Divide6 <- Digital Divide	0.00988057	1.64489	0.101197
	Digital Divide7 <- Digital Divide	0.00193199	0.403029	0.687257
	Digital Divide8 <- Digital Divide	-0.0109274	1.32207	0.187302
	Digital Divide9 <- Digital Divide	0.00315615	0.619067	0.536412
	Effort expectancy1 <- Effort expectancy	-0.00495502	0.128965	0.897484
	Effort expectancy2 <- Effort expectancy	0.010549	0.276765	0.78218
	Effort expectancy3 <- Effort expectancy	0.00408931	0.106485	0.915279
	Effort expectancy4 <- Effort expectancy	-0.0475029	1.38617	0.166877
	Performance expectancy1 <- Performance expectancy	-0.00227139	0.0880802	0.92988
	Performance expectancy2 <- Performance expectancy	0.00510019	0.187103	0.851725
	Performance expectancy3 <- Performance expectancy	-0.00949054	0.360602	0.718688
	Performance expectancy4 <- Performance expectancy	0.00576913	0.229451	0.818698
	Social influence1 <- Social influence	0.0720396	1.72129	0.0863824
	Social influence2 <- Social influence	-0.0237209	0.667454	0.505072
	Social influence3 <- Social influence	-0.0801099	1.89134	0.0596858
	Social influence4 <- Social influence	0.00484845	0.121202	0.903624
	Welch-Satterthwaite test
		Difference (Group_1 - Group_2)	t value (|Group_1 vs Group_2|)	p value (Group_1 vs Group_2)
	AI Literacy1 <- AI Literacy	0.00471017	0.767059	0.444493
	AI Literacy10 <- AI Literacy	0.00130571	0.275512	0.783374
	AI Literacy11 <- AI Literacy	0.00471331	1.01894	0.310183
	AI Literacy12 <- AI Literacy	0.0125577	2.05728	0.0417393
	AI Literacy13 <- AI Literacy	0.000987298	0.140357	0.888604
	AI Literacy14 <- AI Literacy	0.000135747	0.0246908	0.980341
	AI Literacy15 <- AI Literacy	0.0102715	2.0427	0.0431682
	AI Literacy16 <- AI Literacy	0.00640293	1.03385	0.303218
	AI Literacy17 <- AI Literacy	0.00136645	0.282291	0.778183
	AI Literacy18 <- AI Literacy	0.0063811	1.22417	0.223156
	AI Literacy19 <- AI Literacy	-0.00138759	0.289876	0.772387
	AI Literacy2 <- AI Literacy	0.00701176	1.03525	0.302534
	AI Literacy20 <- AI Literacy	0.00335499	0.654355	0.514066
	AI Literacy21 <- AI Literacy	0.00176537	0.362028	0.717932
	AI Literacy22 <- AI Literacy	0.00680692	1.31405	0.191216
	AI Literacy23 <- AI Literacy	0.000833105	0.158463	0.874346
	AI Literacy24 <- AI Literacy	0.00553742	0.94305	0.347474
	AI Literacy25 <- AI Literacy	0.000341696	0.056035	0.955403
	AI Literacy3 <- AI Literacy	0.0110677	2.22438	0.0279035
	AI Literacy4 <- AI Literacy	0.0113005	1.56429	0.120298
	AI Literacy5 <- AI Literacy	-0.00511122	0.675108	0.500864
	AI Literacy6 <- AI Literacy	-0.0049836	0.963394	0.337195
	AI Literacy7 <- AI Literacy	0.0026215	0.4614	0.645313
	AI Literacy8 <- AI Literacy	0.0149983	2.28549	0.0239549
	AI Literacy9 <- AI Literacy	0.000453233	0.0831884	0.933831
	Behavioral intention to use AI1 <- Behavioral intention to use AI	0.0356137	0.747794	0.455967
	Behavioral intention to use AI2 <- Behavioral intention to use AI	-0.0187611	0.406552	0.685026
	Behavioral intention to use AI3 <- Behavioral intention to use AI	0.0423318	0.934366	0.351902
	Cognitive Absorption1 <- Cognitive Absorption	0.00616934	0.553835	0.580665
	Cognitive Absorption10 <- Cognitive Absorption	0.0115458	0.986986	0.325541
	Cognitive Absorption11 <- Cognitive Absorption	-0.0136537	1.17444	0.242434
	Cognitive Absorption12 <- Cognitive Absorption	0.010242	1.00139	0.318543
	Cognitive Absorption13 <- Cognitive Absorption	-0.0153203	1.18393	0.238651
	Cognitive Absorption14 <- Cognitive Absorption	-0.0089372	0.720745	0.472402
	Cognitive Absorption15 <- Cognitive Absorption	0.00336065	0.230157	0.818343
	Cognitive Absorption16 <- Cognitive Absorption	-0.0062065	0.522705	0.60209
	Cognitive Absorption17 <- Cognitive Absorption	-0.00942474	0.860755	0.390995
	Cognitive Absorption18 <- Cognitive Absorption	-0.00965498	0.818526	0.41459
	Cognitive Absorption19 <- Cognitive Absorption	0.00666044	0.539989	0.590158
	Cognitive Absorption2 <- Cognitive Absorption	0.00254919	0.214754	0.830304
	Cognitive Absorption20 <- Cognitive Absorption	-0.00674421	0.535915	0.592962
	Cognitive Absorption3 <- Cognitive Absorption	0.0176841	1.43561	0.153573
	Cognitive Absorption4 <- Cognitive Absorption	0.0150028	1.25553	0.21161
	Cognitive Absorption5 <- Cognitive Absorption	-0.0030301	0.254064	0.79986
	Cognitive Absorption6 <- Cognitive Absorption	0.0159309	1.23453	0.219303
	Cognitive Absorption7 <- Cognitive Absorption	0.0172965	1.16068	0.247983
	Cognitive Absorption8 <- Cognitive Absorption	-0.00837902	0.582326	0.561396
	Cognitive Absorption9 <- Cognitive Absorption	-0.00160632	0.135062	0.892778
	Computing Thinking1 <- Computing Thinking	0.00132429	0.198513	0.842959
	Computing Thinking10 <- Computing Thinking	0.000156106	0.0199702	0.984099
	Computing Thinking11 <- Computing Thinking	-0.00558298	0.872217	0.384723
	Computing Thinking12 <- Computing Thinking	-0.00178612	0.228469	0.819652
	Computing Thinking13 <- Computing Thinking	0.0083901	1.06644	0.288249
	Computing Thinking14 <- Computing Thinking	-0.00866385	1.30597	0.193923
	Computing Thinking15 <- Computing Thinking	-0.00694201	0.997631	0.320355
	Computing Thinking16 <- Computing Thinking	0.00317716	0.465925	0.642067
	Computing Thinking17 <- Computing Thinking	0.00280071	0.314631	0.753554
	Computing Thinking18 <- Computing Thinking	-0.00835127	1.23049	0.220769
	Computing Thinking19 <- Computing Thinking	0.00181327	0.262228	0.793571
	Computing Thinking2 <- Computing Thinking	0.0105171	1.38123	0.169633
	Computing Thinking20 <- Computing Thinking	-0.00306876	0.427497	0.669742
	Computing Thinking21 <- Computing Thinking	0.00141225	0.190942	0.848876
	Computing Thinking22 <- Computing Thinking	0.00723631	1.03394	0.303098
	Computing Thinking23 <- Computing Thinking	0.00232606	0.369011	0.712734
	Computing Thinking24 <- Computing Thinking	0.0051672	0.83969	0.402648
	Computing Thinking25 <- Computing Thinking	0.00246002	0.400402	0.689528
	Computing Thinking26 <- Computing Thinking	-0.00179002	0.220678	0.8257
	Computing Thinking27 <- Computing Thinking	-0.00212753	0.311871	0.755646
	Computing Thinking28 <- Computing Thinking	-2.07143e-05	0.00287763	0.997709
	Computing Thinking29 <- Computing Thinking	-0.0112553	1.23849	0.217855
	Computing Thinking3 <- Computing Thinking	-0.00689668	1.04253	0.299132
	Computing Thinking4 <- Computing Thinking	0.0161482	2.3758	0.0190177
	Computing Thinking5 <- Computing Thinking	-0.00150167	0.20132	0.84077
	Computing Thinking6 <- Computing Thinking	0.00782058	1.05101	0.295266
	Computing Thinking7 <- Computing Thinking	-0.00231895	0.338596	0.735469
	Computing Thinking8 <- Computing Thinking	0.00318093	0.414097	0.679496
	Computing Thinking9 <- Computing Thinking	-0.00475342	0.75107	0.454
	Digital Divide1 <- Digital Divide	0.00970623	1.52854	0.128927
	Digital Divide10 <- Digital Divide	0.00509255	1.07912	0.282627
	Digital Divide11 <- Digital Divide	0.0140556	2.37079	0.019291
	Digital Divide12 <- Digital Divide	-0.00277102	0.489795	0.625144
	Digital Divide13 <- Digital Divide	0.00731218	1.10648	0.27066
	Digital Divide14 <- Digital Divide	0.00123506	0.208459	0.835212
	Digital Divide15 <- Digital Divide	0.00121579	0.240705	0.810181
	Digital Divide16 <- Digital Divide	-0.0102042	1.56021	0.121259
	Digital Divide17 <- Digital Divide	0.00308452	0.58152	0.561946
	Digital Divide18 <- Digital Divide	0.00286091	0.579844	0.563072
	Digital Divide19 <- Digital Divide	-0.00154464	0.245775	0.806263
	Digital Divide2 <- Digital Divide	-0.000369451	0.0642739	0.948856
	Digital Divide20 <- Digital Divide	0.00198399	0.341882	0.733018
	Digital Divide21 <- Digital Divide	-0.00471172	0.783221	0.434991
	Digital Divide22 <- Digital Divide	-0.000291463	0.0570218	0.95462
	Digital Divide23 <- Digital Divide	0.000218367	0.0402666	0.967945
	Digital Divide24 <- Digital Divide	-0.00206173	0.413595	0.679885
	Digital Divide25 <- Digital Divide	0.00354867	0.690708	0.49104
	Digital Divide26 <- Digital Divide	0.000820739	0.143134	0.886416
	Digital Divide27 <- Digital Divide	0.00347445	0.720181	0.472758
	Digital Divide28 <- Digital Divide	0.00435601	0.73751	0.462194
	Digital Divide29 <- Digital Divide	0.00397364	0.711678	0.478001
	Digital Divide3 <- Digital Divide	0.00155376	0.304049	0.761596
	Digital Divide30 <- Digital Divide	0.00315271	0.574418	0.566717
	Digital Divide31 <- Digital Divide	-0.00282556	0.481751	0.630832
	Digital Divide32 <- Digital Divide	0.00370231	0.71558	0.475596
	Digital Divide33 <- Digital Divide	0.000659167	0.12364	0.9018
	Digital Divide34 <- Digital Divide	0.00596294	1.21266	0.227566
	Digital Divide35 <- Digital Divide	0.00254424	0.368757	0.712938
	Digital Divide36 <- Digital Divide	0.00149157	0.290089	0.772232
	Digital Divide4 <- Digital Divide	0.00165363	0.225943	0.821618
	Digital Divide5 <- Digital Divide	-0.00341851	0.617383	0.538114
	Digital Divide6 <- Digital Divide	0.00988057	1.5747	0.117873
	Digital Divide7 <- Digital Divide	0.00193199	0.386822	0.699551
	Digital Divide8 <- Digital Divide	-0.0109274	1.26542	0.208094
	Digital Divide9 <- Digital Divide	0.00315615	0.594999	0.552928
	Effort expectancy1 <- Effort expectancy	-0.00495502	0.129721	0.896988
	Effort expectancy2 <- Effort expectancy	0.010549	0.279983	0.779935
	Effort expectancy3 <- Effort expectancy	0.00408931	0.106552	0.91531
	Effort expectancy4 <- Effort expectancy	-0.0475029	1.39724	0.164721
	Performance expectancy1 <- Performance expectancy	-0.00227139	0.0895622	0.928772
	Performance expectancy2 <- Performance expectancy	0.00510019	0.191084	0.848754
	Performance expectancy3 <- Performance expectancy	-0.00949054	0.367115	0.714125
	Performance expectancy4 <- Performance expectancy	0.00576913	0.234363	0.815066
	Social influence1 <- Social influence	0.0720396	1.69934	0.091703
	Social influence2 <- Social influence	-0.0237209	0.663176	0.50841
	Social influence3 <- Social influence	-0.0801099	1.86171	0.0649554
	Social influence4 <- Social influence	0.00484845	0.121998	0.903089
	Confidence intervals (bias corrected)
		2.5% (Group_1)	97.5% (Group_1)	2.5% (Group_2)	97.5% (Group_2)
	AI Literacy1 <- AI Literacy	0.043407	0.0656908	0.0430435	0.0529722
	AI Literacy10 <- AI Literacy	0.0442988	0.0603122	0.0463176	0.0557332
	AI Literacy11 <- AI Literacy	0.0433743	0.0589513	0.0413282	0.0511189
	AI Literacy12 <- AI Literacy	0.047662	0.0697934	0.0393142	0.0499211
	AI Literacy13 <- AI Literacy	0.0300315	0.0566237	0.039487	0.0493721
	AI Literacy14 <- AI Literacy	0.0439103	0.0635649	0.0478739	0.0581144
	AI Literacy15 <- AI Literacy	0.0484444	0.0663283	0.040888	0.0505202
	AI Literacy16 <- AI Literacy	0.0451414	0.0693884	0.0441494	0.0525709
	AI Literacy17 <- AI Literacy	0.0388714	0.0554917	0.0410458	0.0503939
	AI Literacy18 <- AI Literacy	0.0466765	0.0638837	0.0422282	0.0537246
	AI Literacy19 <- AI Literacy	0.0388833	0.0553334	0.0439115	0.0534459
	AI Literacy2 <- AI Literacy	0.0440093	0.0680572	0.0397993	0.0526574
	AI Literacy20 <- AI Literacy	0.0403775	0.0566719	0.0386577	0.050741
	AI Literacy21 <- AI Literacy	0.0432317	0.0595699	0.0444671	0.0550415
	AI Literacy22 <- AI Literacy	0.0449893	0.0630944	0.0406348	0.0512543
	AI Literacy23 <- AI Literacy	0.0427502	0.0615591	0.0474346	0.0572299
	AI Literacy24 <- AI Literacy	0.0467114	0.0677681	0.0449207	0.0550957
	AI Literacy25 <- AI Literacy	0.0381334	0.0596961	0.0438802	0.0557274
	AI Literacy3 <- AI Literacy	0.049155	0.0663006	0.0405057	0.0506762
	AI Literacy4 <- AI Literacy	0.0444089	0.0717272	0.0401467	0.0498809
	AI Literacy5 <- AI Literacy	0.026589	0.055535	0.0442236	0.054823
	AI Literacy6 <- AI Literacy	0.034196	0.05209	0.044139	0.0539301
	AI Literacy7 <- AI Literacy	0.0431655	0.063065	0.04419	0.054059
	AI Literacy8 <- AI Literacy	0.0431047	0.0655417	0.0306947	0.044353
	AI Literacy9 <- AI Literacy	0.0417191	0.0574217	0.0409484	0.0555106
	Behavioral intention to use AI1 <- Behavioral intention to use AI	0.376645	0.528006	0.354861	0.471008
	Behavioral intention to use AI2 <- Behavioral intention to use AI	0.268856	0.432878	0.335891	0.427584
	Behavioral intention to use AI3 <- Behavioral intention to use AI	0.364062	0.51628	0.342735	0.439272
	Cognitive Absorption1 <- Cognitive Absorption	0.0438555	0.0803754	0.0423662	0.0671281
	Cognitive Absorption10 <- Cognitive Absorption	0.0405852	0.0802682	0.0360351	0.060522
	Cognitive Absorption11 <- Cognitive Absorption	0.0378991	0.0768893	0.0616122	0.0853328
	Cognitive Absorption12 <- Cognitive Absorption	0.0506513	0.0840988	0.04511	0.0682545
	Cognitive Absorption13 <- Cognitive Absorption	0.0455116	0.0878376	0.0684897	0.0992084
	Cognitive Absorption14 <- Cognitive Absorption	0.0229555	0.0659159	0.045169	0.0696018
	Cognitive Absorption15 <- Cognitive Absorption	0.0517751	0.101435	0.0538806	0.0842155
	Cognitive Absorption16 <- Cognitive Absorption	0.0432205	0.0828121	0.0571648	0.0826526
	Cognitive Absorption17 <- Cognitive Absorption	0.0257741	0.0619393	0.0418261	0.0657467
	Cognitive Absorption18 <- Cognitive Absorption	0.0259479	0.0649238	0.0443216	0.0704228
	Cognitive Absorption19 <- Cognitive Absorption	0.0485919	0.090397	0.0487195	0.0738869
	Cognitive Absorption2 <- Cognitive Absorption	0.0499715	0.0894705	0.0530367	0.0790646
	Cognitive Absorption20 <- Cognitive Absorption	0.0231166	0.0671402	0.0417077	0.0656125
	Cognitive Absorption3 <- Cognitive Absorption	0.0561109	0.0964904	0.0407905	0.0688706
	Cognitive Absorption4 <- Cognitive Absorption	0.0548374	0.0961325	0.0468609	0.0702814
	Cognitive Absorption5 <- Cognitive Absorption	0.0380306	0.0782444	0.0486299	0.0729905
	Cognitive Absorption6 <- Cognitive Absorption	0.0534907	0.0971972	0.0477526	0.0721925
	Cognitive Absorption7 <- Cognitive Absorption	0.0526625	0.105765	0.0433053	0.067584
	Cognitive Absorption8 <- Cognitive Absorption	0.0254944	0.0775623	0.0519623	0.0767018
	Cognitive Absorption9 <- Cognitive Absorption	0.0400417	0.0804297	0.0521896	0.0764495
	Computing Thinking1 <- Computing Thinking	0.0349628	0.0559234	0.0358593	0.0519506
	Computing Thinking10 <- Computing Thinking	0.0394398	0.0643408	0.0418287	0.0604478
	Computing Thinking11 <- Computing Thinking	0.0293412	0.0481308	0.0378978	0.0542686
	Computing Thinking12 <- Computing Thinking	0.0311034	0.0575824	0.0382614	0.0548654
	Computing Thinking13 <- Computing Thinking	0.0408734	0.0664008	0.0345748	0.0517778
	Computing Thinking14 <- Computing Thinking	0.0279738	0.0490794	0.0402817	0.0559332
	Computing Thinking15 <- Computing Thinking	0.0296569	0.0515966	0.0394823	0.0557564
	Computing Thinking16 <- Computing Thinking	0.0354725	0.0576026	0.0356772	0.0513226
	Computing Thinking17 <- Computing Thinking	0.0383022	0.0650162	0.0368277	0.0593024
	Computing Thinking18 <- Computing Thinking	0.0309118	0.0514618	0.0412054	0.0587235
	Computing Thinking19 <- Computing Thinking	0.0350786	0.0580656	0.0370922	0.0521323
	Computing Thinking2 <- Computing Thinking	0.0419988	0.0666516	0.0338828	0.0514146
	Computing Thinking20 <- Computing Thinking	0.0225572	0.0453024	0.0296232	0.0465167
	Computing Thinking21 <- Computing Thinking	0.0241291	0.0475598	0.0271255	0.0444023
	Computing Thinking22 <- Computing Thinking	0.0354722	0.0551682	0.0267812	0.0470084
	Computing Thinking23 <- Computing Thinking	0.0313972	0.0516954	0.0314126	0.046091
	Computing Thinking24 <- Computing Thinking	0.0389987	0.0578302	0.0358247	0.0512127
	Computing Thinking25 <- Computing Thinking	0.0340061	0.0530548	0.0347696	0.049741
	Computing Thinking26 <- Computing Thinking	0.0208653	0.048798	0.0309726	0.0466229
	Computing Thinking27 <- Computing Thinking	0.0270714	0.0484534	0.0314942	0.0490278
	Computing Thinking28 <- Computing Thinking	0.033819	0.058301	0.0376032	0.0530487
	Computing Thinking29 <- Computing Thinking	0.0151724	0.0471903	0.0371415	0.0533593
	Computing Thinking3 <- Computing Thinking	0.0200446	0.0412747	0.0316501	0.0477461
	Computing Thinking4 <- Computing Thinking	0.0445723	0.0677172	0.0306315	0.0450449
	Computing Thinking5 <- Computing Thinking	0.0253035	0.0489044	0.0303887	0.0480369
	Computing Thinking6 <- Computing Thinking	0.0404627	0.0661345	0.0370494	0.0504812
	Computing Thinking7 <- Computing Thinking	0.036241	0.057008	0.0405553	0.0587642
	Computing Thinking8 <- Computing Thinking	0.0328314	0.0567744	0.0315089	0.0505501
	Computing Thinking9 <- Computing Thinking	0.0275706	0.047563	0.0351685	0.0501075
	Digital Divide1 <- Digital Divide	0.0328331	0.0576305	0.0278838	0.0348591
	Digital Divide10 <- Digital Divide	0.0311266	0.0494479	0.0302481	0.0355531
	Digital Divide11 <- Digital Divide	0.0360484	0.0581142	0.0250045	0.0330656
	Digital Divide12 <- Digital Divide	0.015197	0.0363343	0.0256135	0.0333023
	Digital Divide13 <- Digital Divide	0.02982	0.054652	0.0273583	0.035395
	Digital Divide14 <- Digital Divide	0.0249924	0.0481406	0.0305149	0.036692
	Digital Divide15 <- Digital Divide	0.0263648	0.0450391	0.0306022	0.0367216
	Digital Divide16 <- Digital Divide	0.00906304	0.0334376	0.0331426	0.0393527
	Digital Divide17 <- Digital Divide	0.0264426	0.0466439	0.0287407	0.0344507
	Digital Divide18 <- Digital Divide	0.025478	0.0445	0.0291502	0.0345895
	Digital Divide19 <- Digital Divide	0.0204482	0.0453321	0.0314271	0.0368564
	Digital Divide2 <- Digital Divide	0.0258366	0.0473386	0.0328919	0.0391285
	Digital Divide20 <- Digital Divide	0.0255092	0.0478923	0.0300894	0.0371655
	Digital Divide21 <- Digital Divide	0.0139339	0.0369527	0.027677	0.0360541
	Digital Divide22 <- Digital Divide	0.0225244	0.0414474	0.0293254	0.0362899
	Digital Divide23 <- Digital Divide	0.0209263	0.0401523	0.0270838	0.0355411
	Digital Divide24 <- Digital Divide	0.0245398	0.0435073	0.0323628	0.0386929
	Digital Divide25 <- Digital Divide	0.0295904	0.0487274	0.0310849	0.0367399
	Digital Divide26 <- Digital Divide	0.0195683	0.0403431	0.0282287	0.0352441
	Digital Divide27 <- Digital Divide	0.0272325	0.0453834	0.0283831	0.0354824
	Digital Divide28 <- Digital Divide	0.0292216	0.05083	0.0287852	0.0374045
	Digital Divide29 <- Digital Divide	0.0317471	0.0535733	0.0331946	0.0391955
	Digital Divide3 <- Digital Divide	0.0259619	0.0445573	0.0291625	0.037506
	Digital Divide30 <- Digital Divide	0.0220496	0.0425214	0.0254015	0.0334221
	Digital Divide31 <- Digital Divide	0.0187531	0.0411341	0.0304097	0.0365517
	Digital Divide32 <- Digital Divide	0.024924	0.0442994	0.0269718	0.0330747
	Digital Divide33 <- Digital Divide	0.0211614	0.0412726	0.0275921	0.0347359
	Digital Divide34 <- Digital Divide	0.029787	0.048918	0.0287432	0.0347028
	Digital Divide35 <- Digital Divide	0.0275242	0.0533813	0.0316674	0.0374527
	Digital Divide36 <- Digital Divide	0.0242925	0.0432412	0.0286815	0.0355556
	Digital Divide4 <- Digital Divide	0.0219514	0.0504741	0.0304132	0.0364881
	Digital Divide5 <- Digital Divide	0.0173675	0.038244	0.0289942	0.0352869
	Digital Divide6 <- Digital Divide	0.0341375	0.0573067	0.0296682	0.0356152
	Digital Divide7 <- Digital Divide	0.0241747	0.04346	0.0284674	0.0340665
	Digital Divide8 <- Digital Divide	-0.00191674	0.0303384	0.0261984	0.0342291
	Digital Divide9 <- Digital Divide	0.0241545	0.0442631	0.0271743	0.0335019
	Effort expectancy1 <- Effort expectancy	0.239342	0.341022	0.242354	0.352726
	Effort expectancy2 <- Effort expectancy	0.251435	0.34533	0.223191	0.338658
	Effort expectancy3 <- Effort expectancy	0.280395	0.38924	0.276623	0.383077
	Effort expectancy4 <- Effort expectancy	0.255265	0.34643	0.301805	0.404104
	Performance expectancy1 <- Performance expectancy	0.246899	0.307888	0.238478	0.320119
	Performance expectancy2 <- Performance expectancy	0.24438	0.303021	0.220716	0.309153
	Performance expectancy3 <- Performance expectancy	0.235011	0.294193	0.234517	0.317484
	Performance expectancy4 <- Performance expectancy	0.272362	0.326762	0.251804	0.335496
	Social influence1 <- Social influence	0.251872	0.390093	0.184425	0.283391
	Social influence2 <- Social influence	0.250316	0.358628	0.281702	0.374168
	Social influence3 <- Social influence	0.196429	0.339649	0.30857	0.404094
	Social influence4 <- Social influence	0.282188	0.388027	0.269261	0.385359
	Bootstrapping results
		Original (Group_1)	Original (Group_2)	Mean (Group_1)	Mean (Group_2)	STDEV (Group_1)	STDEV (Group_2)	t value (Group_1)	t value (Group_2)	p value (Group_1)	p value (Group_2)
	AI Literacy1 <- AI Literacy	0.0524801	0.0477699	0.052686	0.0478288	0.00562737	0.00251761	9.32586	18.9743	5.68434e-14	5.68434e-14
	AI Literacy10 <- AI Literacy	0.0518272	0.0505215	0.0517851	0.0505277	0.00413005	0.00236212	12.5488	21.3882	5.68434e-14	5.68434e-14
	AI Literacy11 <- AI Literacy	0.0507104	0.0459971	0.0507291	0.0460241	0.00392044	0.00248899	12.9349	18.4802	5.68434e-14	5.68434e-14
	AI Literacy12 <- AI Literacy	0.0570212	0.0444635	0.0571235	0.0445988	0.00548899	0.00272492	10.3883	16.3174	5.68434e-14	5.68434e-14
	AI Literacy13 <- AI Literacy	0.0454242	0.0444369	0.0456898	0.0445671	0.0065979	0.00251836	6.88464	17.6452	6.53699e-12	5.68434e-14
	AI Literacy14 <- AI Literacy	0.0525056	0.0523699	0.0524747	0.0523773	0.00487071	0.00259643	10.7799	20.17	5.68434e-14	5.68434e-14
	AI Literacy15 <- AI Literacy	0.0557764	0.0455049	0.0559704	0.0455523	0.00441489	0.00244804	12.6337	18.5883	5.68434e-14	5.68434e-14
	AI Literacy16 <- AI Literacy	0.0546206	0.0482177	0.0545768	0.0482548	0.0058314	0.00215811	9.36665	22.3425	5.68434e-14	5.68434e-14
	AI Literacy17 <- AI Literacy	0.0470511	0.0456846	0.0471471	0.0457429	0.00424277	0.00236954	11.0897	19.2799	5.68434e-14	5.68434e-14
	AI Literacy18 <- AI Literacy	0.0541777	0.0477966	0.054473	0.047804	0.00435944	0.00289471	12.4277	16.5117	5.68434e-14	5.68434e-14
	AI Literacy19 <- AI Literacy	0.0469458	0.0483334	0.0471609	0.0483914	0.0041565	0.002412	11.2946	20.0388	5.68434e-14	5.68434e-14
	AI Literacy2 <- AI Literacy	0.0536831	0.0466713	0.0538152	0.0467085	0.00598065	0.00323533	8.97613	14.4255	5.68434e-14	5.68434e-14
	AI Literacy20 <- AI Literacy	0.0482577	0.0449027	0.0482806	0.0449864	0.00413832	0.00306055	11.6612	14.6714	5.68434e-14	5.68434e-14
	AI Literacy21 <- AI Literacy	0.0509509	0.0491855	0.0508811	0.0491671	0.00411698	0.00264868	12.3758	18.5698	5.68434e-14	5.68434e-14
	AI Literacy22 <- AI Literacy	0.0527388	0.0459318	0.0527164	0.0459773	0.004466	0.00266445	11.809	17.2388	5.68434e-14	5.68434e-14
	AI Literacy23 <- AI Literacy	0.0524996	0.0516664	0.0523193	0.0516979	0.00468628	0.00242848	11.2028	21.2752	5.68434e-14	5.68434e-14
	AI Literacy24 <- AI Literacy	0.0551076	0.0495702	0.0554087	0.0497682	0.00528469	0.00261212	10.4278	18.977	5.68434e-14	5.68434e-14
	AI Literacy25 <- AI Literacy	0.0501712	0.0498295	0.0503675	0.0498218	0.00535153	0.00297301	9.37511	16.7606	5.68434e-14	5.68434e-14
	AI Literacy3 <- AI Literacy	0.0564142	0.0453465	0.056326	0.0454543	0.00427029	0.00259152	13.2109	17.498	5.68434e-14	5.68434e-14
	AI Literacy4 <- AI Literacy	0.056399	0.0450984	0.0565779	0.0451461	0.00681477	0.00248239	8.27599	18.1673	5.68434e-14	5.68434e-14
	AI Literacy5 <- AI Literacy	0.043662	0.0487733	0.0439044	0.0487918	0.00713629	0.00261722	6.11831	18.6355	1.01835e-09	5.68434e-14
	AI Literacy6 <- AI Literacy	0.0436292	0.0486128	0.0439141	0.0487301	0.00455882	0.00248753	9.5703	19.5426	5.68434e-14	5.68434e-14
	AI Literacy7 <- AI Literacy	0.0515528	0.0489313	0.0518182	0.0489664	0.0051321	0.00248959	10.0452	19.6544	5.68434e-14	5.68434e-14
	AI Literacy8 <- AI Literacy	0.0530332	0.0380349	0.0531469	0.038135	0.00560417	0.00346358	9.46317	10.9814	5.68434e-14	5.68434e-14
	AI Literacy9 <- AI Literacy	0.0490925	0.0486393	0.0492798	0.0486057	0.00399572	0.00373452	12.2863	13.0242	5.68434e-14	5.68434e-14
	Behavioral intention to use AI1 <- Behavioral intention to use AI	0.444498	0.408884	0.44394	0.407308	0.0381437	0.0288246	11.6532	14.1852	5.68434e-14	5.68434e-14
	Behavioral intention to use AI2 <- Behavioral intention to use AI	0.360313	0.379074	0.362095	0.37993	0.04002	0.0233386	9.00333	16.2423	5.68434e-14	5.68434e-14
	Behavioral intention to use AI3 <- Behavioral intention to use AI	0.43174	0.389408	0.431701	0.391108	0.0385107	0.0241993	11.2109	16.0917	5.68434e-14	5.68434e-14
	Cognitive Absorption1 <- Cognitive Absorption	0.0604954	0.054326	0.0605182	0.0543462	0.00921858	0.00633024	6.56233	8.58198	5.83782e-11	5.68434e-14
	Cognitive Absorption10 <- Cognitive Absorption	0.0607381	0.0491923	0.0605562	0.0490481	0.00999748	0.00616196	6.07534	7.98322	1.32962e-09	5.68434e-14
	Cognitive Absorption11 <- Cognitive Absorption	0.058618	0.0722717	0.0577865	0.0722998	0.0099959	0.00602508	5.86421	11.9951	4.80469e-09	5.68434e-14
	Cognitive Absorption12 <- Cognitive Absorption	0.0674279	0.0571859	0.0675217	0.0570318	0.00845399	0.00582714	7.97587	9.81371	5.68434e-14	5.68434e-14
	Cognitive Absorption13 <- Cognitive Absorption	0.0654885	0.0808089	0.0656256	0.0813485	0.0104835	0.00767146	6.24685	10.5337	4.53895e-10	5.68434e-14
	Cognitive Absorption14 <- Cognitive Absorption	0.0490296	0.0579669	0.0481129	0.057862	0.0107201	0.00632837	4.57363	9.15983	4.90953e-06	5.68434e-14
	Cognitive Absorption15 <- Cognitive Absorption	0.0710424	0.0676817	0.0719437	0.0681593	0.012496	0.00766366	5.68522	8.83152	1.38105e-08	5.68434e-14
	Cognitive Absorption16 <- Cognitive Absorption	0.063221	0.0694274	0.063151	0.0693221	0.0100241	0.00645054	6.30688	10.763	3.09512e-10	5.68434e-14
	Cognitive Absorption17 <- Cognitive Absorption	0.0452684	0.0546931	0.0451639	0.0545142	0.00911017	0.00615077	4.96899	8.89207	6.95532e-07	5.68434e-14
	Cognitive Absorption18 <- Cognitive Absorption	0.0477728	0.0574278	0.0472963	0.0575458	0.00983452	0.00659595	4.85767	8.70652	1.22414e-06	5.68434e-14
	Cognitive Absorption19 <- Cognitive Absorption	0.0673341	0.0606737	0.0673556	0.0605031	0.0106496	0.0063182	6.32267	9.603	2.79613e-10	5.68434e-14
	Cognitive Absorption2 <- Cognitive Absorption	0.0677728	0.0652236	0.0683005	0.0654595	0.00996992	0.00652751	6.79772	9.99211	1.18803e-11	5.68434e-14
	Cognitive Absorption20 <- Cognitive Absorption	0.0475631	0.0543073	0.0471347	0.0542666	0.0111376	0.00596436	4.27051	9.1053	1.98649e-05	5.68434e-14
	Cognitive Absorption3 <- Cognitive Absorption	0.0733041	0.05562	0.0739114	0.0553903	0.010125	0.00709981	7.23988	7.83402	5.11591e-13	5.68434e-14
	Cognitive Absorption4 <- Cognitive Absorption	0.0731735	0.0581707	0.0736121	0.0580307	0.0104373	0.00591402	7.01076	9.83608	2.67164e-12	5.68434e-14
	Cognitive Absorption5 <- Cognitive Absorption	0.0557874	0.0588175	0.0565511	0.0590094	0.0102694	0.00615635	5.4324	9.55395	5.8248e-08	5.68434e-14
	Cognitive Absorption6 <- Cognitive Absorption	0.0743634	0.0584326	0.0744147	0.0587082	0.011377	0.00619692	6.5363	9.42929	6.94058e-11	5.68434e-14
	Cognitive Absorption7 <- Cognitive Absorption	0.0725995	0.055303	0.0741466	0.0551427	0.0136482	0.00612864	5.31935	9.0237	1.08699e-07	5.68434e-14
	Cognitive Absorption8 <- Cognitive Absorption	0.0550851	0.0634641	0.0542536	0.0635482	0.0130411	0.00621361	4.22395	10.2137	2.44336e-05	5.68434e-14
	Cognitive Absorption9 <- Cognitive Absorption	0.0612882	0.0628945	0.0608734	0.0630999	0.0102333	0.00615132	5.98906	10.2246	2.25924e-09	5.68434e-14
	Computing Thinking1 <- Computing Thinking	0.0446473	0.043323	0.0448045	0.0433339	0.0052771	0.00412325	8.46059	10.507	5.68434e-14	5.68434e-14
	Computing Thinking10 <- Computing Thinking	0.0495726	0.0494165	0.0499677	0.0496301	0.00630065	0.00467792	7.86785	10.5638	5.68434e-14	5.68434e-14
	Computing Thinking11 <- Computing Thinking	0.039689	0.0452719	0.0393341	0.0454084	0.00488867	0.0041701	8.11856	10.8563	5.68434e-14	5.68434e-14
	Computing Thinking12 <- Computing Thinking	0.0444116	0.0461977	0.0445618	0.0462875	0.00664257	0.00418011	6.68591	11.0518	2.55227e-11	5.68434e-14
	Computing Thinking13 <- Computing Thinking	0.0513806	0.0429905	0.0519699	0.0429649	0.00655761	0.00440208	7.83527	9.76596	5.68434e-14	5.68434e-14
	Computing Thinking14 <- Computing Thinking	0.0386533	0.0473172	0.0385671	0.0475089	0.00531712	0.00401015	7.2696	11.7994	3.97904e-13	5.68434e-14
	Computing Thinking15 <- Computing Thinking	0.0401925	0.0471345	0.0401796	0.0471407	0.00564017	0.0041215	7.12611	11.4362	1.19371e-12	5.68434e-14
	Computing Thinking16 <- Computing Thinking	0.0459544	0.0427772	0.0460428	0.0429195	0.0056335	0.00388927	8.15734	10.9988	5.68434e-14	5.68434e-14
	Computing Thinking17 <- Computing Thinking	0.0497836	0.0469829	0.0500806	0.0472028	0.00690298	0.00567464	7.2119	8.27946	6.25278e-13	5.68434e-14
	Computing Thinking18 <- Computing Thinking	0.0409813	0.0493326	0.0410197	0.0495123	0.00519491	0.00440816	7.88873	11.1912	5.68434e-14	5.68434e-14
	Computing Thinking19 <- Computing Thinking	0.0459458	0.0441325	0.0460355	0.0442069	0.00584442	0.00374611	7.86149	11.7809	5.68434e-14	5.68434e-14
	Computing Thinking2 <- Computing Thinking	0.0522311	0.0417141	0.0523942	0.0418931	0.00624081	0.00441382	8.36929	9.45078	5.68434e-14	5.68434e-14
	Computing Thinking20 <- Computing Thinking	0.0351035	0.0381722	0.0348329	0.0382265	0.00578891	0.00429187	6.06392	8.89407	1.42694e-09	5.68434e-14
	Computing Thinking21 <- Computing Thinking	0.0370586	0.0356463	0.0370268	0.035789	0.00596833	0.00441691	6.2092	8.07041	5.75994e-10	5.68434e-14
	Computing Thinking22 <- Computing Thinking	0.0448077	0.0375714	0.0448297	0.0377799	0.00494037	0.00499514	9.0697	7.52159	5.68434e-14	5.68434e-14
	Computing Thinking23 <- Computing Thinking	0.0410414	0.0387154	0.0411406	0.0386375	0.00517846	0.00363702	7.9254	10.6448	5.68434e-14	5.68434e-14
	Computing Thinking24 <- Computing Thinking	0.0488427	0.0436755	0.0486733	0.0436954	0.00478589	0.00390603	10.2056	11.1816	5.68434e-14	5.68434e-14
	Computing Thinking25 <- Computing Thinking	0.0445048	0.0420448	0.0441512	0.0420713	0.00480499	0.00386682	9.26221	10.8732	5.68434e-14	5.68434e-14
	Computing Thinking26 <- Computing Thinking	0.0368492	0.0386392	0.0363455	0.0385887	0.00709755	0.00399233	5.19182	9.67836	2.16529e-07	5.68434e-14
	Computing Thinking27 <- Computing Thinking	0.0386368	0.0407643	0.0385078	0.0406779	0.00525479	0.00439149	7.35268	9.28256	1.7053e-13	5.68434e-14
	Computing Thinking28 <- Computing Thinking	0.0446135	0.0446342	0.0450525	0.0446484	0.00610095	0.00387318	7.31255	11.5239	2.84217e-13	5.68434e-14
	Computing Thinking29 <- Computing Thinking	0.0335094	0.0447646	0.0334526	0.044896	0.00813961	0.00412185	4.11683	10.8603	3.90319e-05	5.68434e-14
	Computing Thinking3 <- Computing Thinking	0.0331239	0.0400205	0.0328582	0.0400123	0.00523128	0.00409106	6.33188	9.78244	2.63583e-10	5.68434e-14
	Computing Thinking4 <- Computing Thinking	0.05417	0.0380217	0.0544215	0.0381168	0.00578242	0.00362282	9.36805	10.4951	5.68434e-14	5.68434e-14
	Computing Thinking5 <- Computing Thinking	0.0381695	0.0396712	0.0381503	0.0395031	0.00603796	0.00442889	6.3216	8.95737	2.81545e-10	5.68434e-14
	Computing Thinking6 <- Computing Thinking	0.0511839	0.0433633	0.0517593	0.0434423	0.00662606	0.00344988	7.72464	12.5695	5.68434e-14	5.68434e-14
	Computing Thinking7 <- Computing Thinking	0.0461997	0.0485186	0.0461412	0.0486613	0.00513344	0.00457332	8.99975	10.6091	5.68434e-14	5.68434e-14
	Computing Thinking8 <- Computing Thinking	0.0443521	0.0411712	0.0445373	0.0411003	0.00604346	0.00478978	7.33886	8.59564	2.84217e-13	5.68434e-14
	Computing Thinking9 <- Computing Thinking	0.0380459	0.0427993	0.0379393	0.0427367	0.00513114	0.00374677	7.41471	11.423	1.7053e-13	5.68434e-14
	Digital Divide1 <- Digital Divide	0.0409097	0.0312035	0.0416677	0.0311936	0.00613129	0.00174725	6.67229	17.8586	2.79101e-11	5.68434e-14
	Digital Divide10 <- Digital Divide	0.0379471	0.0328545	0.0382317	0.032855	0.00454414	0.00134144	8.35078	24.4921	5.68434e-14	5.68434e-14
	Digital Divide11 <- Digital Divide	0.0437188	0.0296633	0.0443717	0.0296191	0.00559766	0.00202371	7.8102	14.6579	5.68434e-14	5.68434e-14
	Digital Divide12 <- Digital Divide	0.0268381	0.0296091	0.026525	0.0295923	0.00533647	0.00194544	5.02918	15.2198	5.0987e-07	5.68434e-14
	Digital Divide13 <- Digital Divide	0.0389683	0.0316561	0.0396612	0.0316891	0.00631766	0.00202694	6.16815	15.6177	7.45842e-10	5.68434e-14
	Digital Divide14 <- Digital Divide	0.0347125	0.0334775	0.0346505	0.03355	0.00574381	0.0015466	6.04346	21.6459	1.61862e-09	5.68434e-14
	Digital Divide15 <- Digital Divide	0.0346951	0.0334793	0.0351842	0.0335192	0.00482143	0.00157147	7.19601	21.3045	7.38964e-13	5.68434e-14
	Digital Divide16 <- Digital Divide	0.0256268	0.035831	0.024464	0.0359314	0.00637035	0.00159289	4.02282	22.4944	5.83542e-05	5.68434e-14
	Digital Divide17 <- Digital Divide	0.0348326	0.031748	0.0351195	0.0316833	0.00512073	0.00146232	6.80227	21.7108	1.15392e-11	5.68434e-14
	Digital Divide18 <- Digital Divide	0.0346507	0.0317898	0.0344971	0.0318304	0.00476329	0.00136004	7.27454	23.3742	3.97904e-13	5.68434e-14
	Digital Divide19 <- Digital Divide	0.0324509	0.0339955	0.0323026	0.0339813	0.00615913	0.00137129	5.26874	24.7909	1.43155e-07	5.68434e-14
	Digital Divide2 <- Digital Divide	0.0352254	0.0355948	0.0355585	0.0356366	0.00554361	0.00160411	6.35423	22.1898	2.28226e-10	5.68434e-14
	Digital Divide20 <- Digital Divide	0.0353859	0.0334019	0.0355618	0.0334864	0.00553991	0.00180411	6.38745	18.5144	1.84116e-10	5.68434e-14
	Digital Divide21 <- Digital Divide	0.0272667	0.0319784	0.0268365	0.0321081	0.00565455	0.00212241	4.82208	15.067	1.46298e-06	5.68434e-14
	Digital Divide22 <- Digital Divide	0.0324092	0.0327006	0.0321801	0.0327312	0.00482225	0.00175525	6.72075	18.6302	2.00657e-11	5.68434e-14
	Digital Divide23 <- Digital Divide	0.0319898	0.0317714	0.0313975	0.0317478	0.00501223	0.00212612	6.38235	14.9434	1.90369e-10	5.68434e-14
	Digital Divide24 <- Digital Divide	0.0329604	0.0350221	0.0332348	0.0351007	0.00474182	0.00160085	6.95099	21.8772	4.14957e-12	5.68434e-14
	Digital Divide25 <- Digital Divide	0.0372134	0.0336647	0.0378493	0.0336746	0.00495572	0.00143124	7.50918	23.5214	5.68434e-14	5.68434e-14
	Digital Divide26 <- Digital Divide	0.0323446	0.0315239	0.0316123	0.0316013	0.00548311	0.0017543	5.89896	17.9695	3.90042e-09	5.68434e-14
	Digital Divide27 <- Digital Divide	0.0354552	0.0319807	0.0352355	0.0319016	0.00450467	0.00177994	7.87075	17.9673	5.68434e-14	5.68434e-14
	Digital Divide28 <- Digital Divide	0.037827	0.033471	0.038288	0.0335303	0.00552682	0.00214881	6.84426	15.5765	8.58336e-12	5.68434e-14
	Digital Divide29 <- Digital Divide	0.0396725	0.0356989	0.0401795	0.0357106	0.00539984	0.00150553	7.34698	23.7118	2.84217e-13	5.68434e-14
	Digital Divide3 <- Digital Divide	0.0349161	0.0333624	0.0347387	0.0334277	0.00466813	0.00212842	7.47967	15.6747	5.68434e-14	5.68434e-14
	Digital Divide30 <- Digital Divide	0.0332286	0.0300759	0.0327776	0.0300167	0.00512385	0.0020273	6.48508	14.8354	9.73728e-11	5.68434e-14
	Digital Divide31 <- Digital Divide	0.0303946	0.0332201	0.0301948	0.0332487	0.00567266	0.00158014	5.35808	21.0236	8.79007e-08	5.68434e-14
	Digital Divide32 <- Digital Divide	0.0339779	0.0302756	0.0341567	0.0302938	0.00495997	0.00154327	6.85043	19.6178	8.2423e-12	5.68434e-14
	Digital Divide33 <- Digital Divide	0.032096	0.0314368	0.031728	0.0314811	0.00503919	0.00180455	6.36928	17.4208	2.07081e-10	5.68434e-14
	Digital Divide34 <- Digital Divide	0.0377592	0.0317963	0.0377248	0.0317539	0.00469716	0.00151963	8.03873	20.9238	5.68434e-14	5.68434e-14
	Digital Divide35 <- Digital Divide	0.0368165	0.0342722	0.0377408	0.0342856	0.00677691	0.00143492	5.43264	23.8844	5.81724e-08	5.68434e-14
	Digital Divide36 <- Digital Divide	0.0337552	0.0322636	0.0333967	0.0323223	0.00486609	0.00172333	6.93682	18.7217	4.49063e-12	5.68434e-14
	Digital Divide4 <- Digital Divide	0.0347962	0.0331425	0.0350984	0.033156	0.0071865	0.00153282	4.84187	21.6219	1.32508e-06	5.68434e-14
	Digital Divide5 <- Digital Divide	0.0286335	0.032052	0.0283756	0.0320057	0.00532607	0.00159299	5.3761	20.1206	7.95951e-08	5.68434e-14
	Digital Divide6 <- Digital Divide	0.0424939	0.0326133	0.0432273	0.0326033	0.00612239	0.00148405	6.94073	21.9759	4.37694e-12	5.68434e-14
	Digital Divide7 <- Digital Divide	0.0332611	0.0313291	0.0333206	0.0312839	0.00481194	0.0014107	6.9122	22.2081	5.40012e-12	5.68434e-14
	Digital Divide8 <- Digital Divide	0.0194432	0.0303707	0.0181105	0.0304336	0.00843382	0.00200987	2.30539	15.1108	0.0211854	5.68434e-14
	Digital Divide9 <- Digital Divide	0.0334658	0.0303096	0.0335286	0.0303387	0.00507471	0.0016154	6.59461	18.7629	4.71232e-11	5.68434e-14
	Effort expectancy1 <- Effort expectancy	0.289191	0.294146	0.288055	0.294297	0.0261699	0.0280242	11.0505	10.4961	5.68434e-14	5.68434e-14
	Effort expectancy2 <- Effort expectancy	0.292397	0.281848	0.294529	0.281015	0.0241381	0.0291159	12.1135	9.68021	5.68434e-14	5.68434e-14
	Effort expectancy3 <- Effort expectancy	0.33181	0.32772	0.332036	0.328016	0.0277437	0.0267306	11.9598	12.2601	5.68434e-14	5.68434e-14
	Effort expectancy4 <- Effort expectancy	0.300257	0.34776	0.300174	0.347831	0.0227481	0.0254399	13.1992	13.6699	5.68434e-14	5.68434e-14
	Performance expectancy1 <- Performance expectancy	0.275264	0.277535	0.275956	0.277543	0.0151534	0.0204555	18.1652	13.5678	5.68434e-14	5.68434e-14
	Performance expectancy2 <- Performance expectancy	0.272323	0.267223	0.27185	0.267752	0.0148872	0.0222743	18.2925	11.9969	5.68434e-14	5.68434e-14
	Performance expectancy3 <- Performance expectancy	0.265773	0.275263	0.266367	0.274691	0.0151683	0.0210543	17.5216	13.074	5.68434e-14	5.68434e-14
	Performance expectancy4 <- Performance expectancy	0.295065	0.289296	0.295456	0.289993	0.0136995	0.0205633	21.5384	14.0686	5.68434e-14	5.68434e-14
	Social influence1 <- Social influence	0.30961	0.23757	0.311541	0.237797	0.034371	0.0250956	9.00788	9.46659	5.68434e-14	5.68434e-14
	Social influence2 <- Social influence	0.303536	0.327257	0.302273	0.327721	0.0275599	0.0230166	11.0137	14.2183	5.68434e-14	5.68434e-14
	Social influence3 <- Social influence	0.272135	0.352245	0.271553	0.353034	0.0356518	0.0243932	7.63312	14.4403	5.68434e-14	5.68434e-14
	Social influence4 <- Social influence	0.326745	0.321897	0.328783	0.322005	0.0270177	0.0293522	12.0938	10.9667	5.68434e-14	5.68434e-14
	Algorithm
	设定
	数据文件
		设定
	Weighting vector	-
	数据文件	310
	PLS-SEM algorithm
		设定
	Initial weights	1.0
	Type of results	标准化
	停止标准	10⁻⁷
	加权方案	路径
	是否使用 Lohmoeller设定？	否
	最大迭代次数	3000
	自助法
		设定
	Save results per sample	否
	Seed	Fixed seed
	复杂性	Most important (faster)
	并行处理	是
	显著性水平	0.05
	样本	5000
	检验类型	Two tailed
	置信区间方法	Percentile bootstrap
	Multigroup analysis
		设定
	A组	[Group_1, Group_2]
	B组	[Group_1, Group_2]
	Construct outer weighting mode
		设定
	AI Literacy	AUTOMATIC
	Behavioral intention to use AI	AUTOMATIC
	Cognitive Absorption	AUTOMATIC
	Computing Thinking	AUTOMATIC
	Digital Divide	AUTOMATIC
	Effort expectancy	AUTOMATIC
	Performance expectancy	AUTOMATIC
	Social influence	AUTOMATIC
	Path coefficients (samples)
	Group_1
		AI Literacy -> Effort expectancy	AI Literacy -> Performance expectancy	AI Literacy -> Social influence	Cognitive Absorption -> AI Literacy	Computing Thinking -> AI Literacy	Digital Divide -> AI Literacy	Effort expectancy -> Behavioral intention to use AI	Performance expectancy -> Behavioral intention to use AI	Social influence -> Behavioral intention to use AI
	Sample 0	0.577338	0.517225	0.522073	0.283093	0.304547	-0.406129	0.395561	0.228131	0.31519
	Sample 1	0.506035	0.500877	0.464977	0.236981	0.366326	-0.302626	0.231532	0.439969	0.333438
	Sample 2	0.562894	0.556967	0.511755	0.349954	0.43319	-0.208372	0.269414	0.327908	0.300272
	Sample 3	0.578548	0.558102	0.593009	0.2343	0.33262	-0.406483	0.289321	0.444925	0.263408
	Sample 4	0.445191	0.351682	0.524764	0.366738	0.320346	-0.317058	0.520638	0.192395	0.250077
	Sample 5	0.589934	0.548607	0.517068	0.355258	0.420286	-0.324948	0.583757	0.33841	0.0624937
	Sample 6	0.545733	0.591744	0.404974	0.240238	0.394887	-0.37602	0.253005	0.447694	0.239101
	Sample 7	0.506295	0.500983	0.554523	0.249572	0.449177	-0.290433	0.396371	0.0776904	0.433633
	Sample 8	0.518051	0.534392	0.513721	0.273509	0.412634	-0.284396	0.302229	0.261011	0.480897
	Sample 9	0.557059	0.542942	0.446009	0.224742	0.266241	-0.444039	0.418503	0.36637	0.17849
	Sample 10	0.408011	0.454974	0.55659	0.372805	0.321265	-0.251878	0.410209	0.414512	0.30515
	Sample 11	0.566407	0.526271	0.5298	0.238385	0.436734	-0.233906	0.141734	0.43864	0.375147
	Sample 12	0.526085	0.488511	0.545239	0.337061	0.375399	-0.224741	0.155462	0.336878	0.413528
	Sample 13	0.580138	0.578598	0.521181	0.277299	0.342001	-0.363222	0.0948676	0.498589	0.370674
	Sample 14	0.517918	0.48525	0.465272	0.200077	0.438918	-0.276444	0.260431	0.495032	0.246192
	Sample 15	0.597803	0.53197	0.594996	0.335139	0.37804	-0.293415	0.371543	0.45348	0.187947
	Sample 16	0.541399	0.615015	0.521657	0.302471	0.297668	-0.38714	0.363167	0.377437	0.0464595
	Sample 17	0.547699	0.502351	0.353602	0.323837	0.170596	-0.354946	0.349127	0.484692	0.242282
	Sample 18	0.526631	0.556034	0.464302	0.347704	0.342439	-0.216187	0.144295	0.531836	0.290068
	Sample 19	0.672374	0.457064	0.667045	0.245775	0.519877	-0.247534	0.25978	0.316779	0.323682
	Sample 20	0.471684	0.460134	0.414778	0.188337	0.526589	-0.204847	0.0906676	0.38509	0.45531
	Sample 21	0.570951	0.592793	0.460601	0.23893	0.305786	-0.409663	0.316219	0.298014	0.334217
	Sample 22	0.518048	0.501308	0.498412	0.174392	0.307858	-0.349843	0.446511	0.31324	0.273559
	Sample 23	0.609896	0.646365	0.621874	0.241515	0.436886	-0.252547	0.396298	0.268902	0.301921
	Sample 24	0.453036	0.549884	0.456992	0.113411	0.36353	-0.316645	0.33666	0.341833	0.31357
	Sample 25	0.432185	0.363786	0.492171	0.360797	0.360973	-0.247129	0.4537	0.0825447	0.269955
	Sample 26	0.671701	0.514387	0.585439	0.16283	0.394219	-0.236564	0.309441	0.201833	0.436918
	Sample 27	0.52284	0.388177	0.473832	0.216009	0.255998	-0.39695	0.309563	0.538648	0.238585
	Sample 28	0.429363	0.415334	0.448115	0.31833	0.284863	-0.333665	0.188506	0.235267	0.546651
	Sample 29	0.464657	0.551706	0.451885	0.245771	0.253838	-0.384221	0.169085	0.445085	0.317715
	Sample 30	0.506889	0.375803	0.438497	0.246532	0.360439	-0.29428	0.189861	0.307758	0.372351
	Sample 31	0.501935	0.47709	0.501294	0.322531	0.223232	-0.309321	0.303014	0.572773	0.252856
	Sample 32	0.540324	0.464351	0.491747	0.343339	0.386529	-0.137279	0.317178	0.249252	0.367651
	Sample 33	0.492355	0.590758	0.678265	0.305822	0.429377	-0.206928	0.313297	0.345794	0.201522
	Sample 34	0.542463	0.524296	0.530702	0.124191	0.589671	-0.184765	0.400558	0.2995	0.22443
	Sample 35	0.572403	0.496262	0.502524	0.357491	0.410984	-0.256594	0.0197862	0.431709	0.486205
	Sample 36	0.532845	0.508655	0.427667	0.253275	0.300343	-0.375071	0.508761	0.325363	0.166804
	Sample 37	0.524436	0.453041	0.485371	0.265175	0.323417	-0.332547	0.25037	0.498634	0.278277
	Sample 38	0.630195	0.62996	0.430192	0.26585	0.478469	-0.262228	0.20124	0.355123	0.407163
	Sample 39	0.568007	0.527684	0.582445	0.370982	0.364999	-0.343974	0.369537	0.32136	0.247824
	Sample 40	0.574534	0.562908	0.563652	0.24673	0.298477	-0.371634	0.510185	0.127846	0.258871
	Sample 41	0.542391	0.509977	0.520252	0.320057	0.376112	-0.168652	0.232168	0.491187	0.308724
	Sample 42	0.544339	0.502523	0.656418	0.216789	0.361732	-0.304066	0.380296	0.187983	0.407702
	Sample 43	0.484936	0.455823	0.39127	0.120476	0.457567	-0.227417	0.271815	0.452973	0.283923
	Sample 44	0.514499	0.475395	0.506151	0.49417	0.277494	-0.159801	0.265846	0.190428	0.509607
	Sample 45	0.459095	0.579582	0.40349	0.156697	0.386247	-0.406368	0.489796	0.197828	0.191753
	Sample 46	0.628242	0.595721	0.47054	0.250622	0.290525	-0.385897	0.176797	0.258352	0.445082
	Sample 47	0.634444	0.479618	0.576516	0.260779	0.249029	-0.358003	0.0149855	0.386342	0.486125
	Sample 48	0.602863	0.555242	0.566733	0.392883	0.38904	-0.210191	0.365295	0.178012	0.237669
	Sample 49	0.601926	0.506735	0.55192	0.378992	0.361327	-0.261917	0.320496	0.290296	0.328738
	Sample 50	0.498668	0.393357	0.432014	0.350269	0.294422	-0.295071	0.339541	0.491098	0.109014
	Sample 51	0.537023	0.548764	0.457777	0.225948	0.335194	-0.364344	0.37836	0.155846	0.388913
	Sample 52	0.515216	0.456882	0.519532	0.285849	0.414996	-0.23027	0.342027	0.406105	0.162125
	Sample 53	0.558813	0.57663	0.589649	0.327937	0.395485	-0.267438	0.307175	0.316268	0.320597
	Sample 54	0.585517	0.424993	0.518528	0.308357	0.433337	-0.280131	0.245829	0.490567	0.195668
	Sample 55	0.504177	0.537476	0.456024	0.318503	0.332639	-0.209204	0.220257	0.376328	0.373871
	Sample 56	0.417816	0.473442	0.379672	0.166741	0.404526	-0.263582	0.150791	0.533132	0.194615
	Sample 57	0.620165	0.516923	0.529312	0.317102	0.337819	-0.288128	0.308182	0.441082	0.265126
	Sample 58	0.536681	0.527619	0.559547	0.236423	0.343421	-0.376909	0.263917	0.480361	0.256344
	Sample 59	0.561251	0.330238	0.541938	0.391422	0.291589	-0.19769	0.384046	0.341781	0.246867
	Sample 60	0.502894	0.498673	0.569791	0.254113	0.402662	-0.342718	0.153672	0.450152	0.373767
	Sample 61	0.582235	0.513565	0.555276	0.416062	0.302651	-0.200024	0.433088	0.178693	0.260103
	Sample 62	0.534339	0.51802	0.422258	0.285692	0.171379	-0.317105	0.39111	0.410323	0.204917
	Sample 63	0.517668	0.611097	0.400601	0.199924	0.394549	-0.319135	0.134162	0.531261	0.301032
	Sample 64	0.543907	0.535496	0.511401	0.205506	0.489039	-0.334775	0.22976	0.275782	0.42847
	Sample 65	0.528273	0.527253	0.526066	0.316023	0.423528	-0.192784	0.266997	0.256478	0.470074
	Sample 66	0.522377	0.588227	0.432876	0.224754	0.358567	-0.304678	0.229076	0.519197	0.243551
	Sample 67	0.588141	0.563488	0.605074	0.42048	0.333498	-0.208626	0.246647	0.306368	0.369196
	Sample 68	0.575137	0.533109	0.637149	0.348618	0.256213	-0.388071	0.556737	0.350558	0.0775841
	Sample 69	0.591223	0.384593	0.575578	0.392555	0.307431	-0.248425	0.175224	0.515151	0.364662
	Sample 70	0.390557	0.44625	0.384058	0.295013	0.461947	-0.24749	0.214802	0.571585	0.223422
	Sample 71	0.553141	0.483857	0.513043	0.312362	0.344403	-0.283012	0.172178	0.426129	0.29756
	Sample 72	0.535901	0.48056	0.567116	0.277755	0.307776	-0.347461	0.29816	0.203128	0.49687
	Sample 73	0.6357	0.506177	0.495107	0.362453	0.392747	-0.186879	0.143319	0.425121	0.335536
	Sample 74	0.461483	0.596425	0.372813	0.274542	0.394399	-0.306689	0.457913	0.49296	-0.00881095
	Sample 75	0.559695	0.486795	0.519676	0.306112	0.399306	-0.225655	0.366179	0.216245	0.441941
	Sample 76	0.626248	0.453678	0.512333	0.302442	0.244531	-0.293966	0.254346	0.5585	0.171517
	Sample 77	0.557446	0.56384	0.570778	0.245969	0.257768	-0.416617	0.265224	0.257277	0.453451
	Sample 78	0.509627	0.570931	0.482349	0.292045	0.409212	-0.320721	0.39294	0.413502	0.250732
	Sample 79	0.632642	0.577551	0.604997	0.339523	0.327447	-0.243489	0.197323	0.388778	0.413096
	Sample 80	0.574253	0.49809	0.50112	0.278795	0.248842	-0.478772	0.150664	0.505807	0.247552
	Sample 81	0.462168	0.439	0.416954	0.312402	0.356876	-0.176769	0.112957	0.332914	0.46611
	Sample 82	0.605408	0.554267	0.421368	0.293189	0.306865	-0.278886	-0.0087562	0.660986	0.276873
	Sample 83	0.450647	0.434203	0.513381	0.30698	0.32087	-0.291983	0.292326	0.438229	0.286482
	Sample 84	0.677345	0.688707	0.562487	0.237318	0.417236	-0.344955	0.0788404	0.516788	0.395933
	Sample 85	0.636735	0.499531	0.430771	0.433638	0.326439	-0.198286	0.306567	0.432744	0.171606
	Sample 86	0.537327	0.537345	0.449808	0.273321	0.282001	-0.395755	0.288291	0.447159	0.226498
	Sample 87	0.618136	0.574522	0.535783	0.372766	0.334995	-0.200051	0.355039	0.380953	0.289186
	Sample 88	0.614204	0.522784	0.500796	0.291898	0.311315	-0.26854	0.160555	0.240074	0.547443
	Sample 89	0.515781	0.454457	0.481892	0.291803	0.353695	-0.251245	0.328711	0.343207	0.368029
	Sample 90	0.558931	0.51539	0.514024	0.262695	0.434298	-0.288885	0.111683	0.345106	0.570663
	Sample 91	0.598412	0.474745	0.575043	0.177789	0.461166	-0.264691	0.230584	0.33341	0.496483
	Sample 92	0.556302	0.496231	0.575427	0.365369	0.327098	-0.230541	0.573086	0.266573	0.179875
	Sample 93	0.511352	0.575879	0.411091	0.438152	0.317724	-0.267255	0.247247	0.542161	0.136039
	Sample 94	0.591138	0.500694	0.51493	0.380849	0.349768	-0.242373	0.410592	0.328219	0.260012
	Sample 95	0.5068	0.48385	0.425609	0.344016	0.34589	-0.339843	0.19946	0.54513	0.197261
	Sample 96	0.524922	0.564714	0.368526	0.182201	0.373146	-0.377236	0.332102	0.567011	0.154223
	Sample 97	0.535884	0.523137	0.537541	0.333906	0.288345	-0.386191	0.3144	0.293181	0.340688
	Sample 98	0.623703	0.490657	0.618572	0.361226	0.472806	-0.157942	0.375958	0.394347	0.232612
	Sample 99	0.450028	0.279556	0.349356	0.181768	0.283281	-0.407474	0.214445	0.564888	0.201685
	Sample 100	0.49411	0.452408	0.612157	0.22144	0.290283	-0.413636	0.458878	0.428229	0.0260768
	Sample 101	0.606752	0.585513	0.482554	0.391253	0.310456	-0.349985	0.201191	0.324951	0.421669
	Sample 102	0.56134	0.531829	0.607518	0.261113	0.376386	-0.283497	0.319894	0.305846	0.390078
	Sample 103	0.541231	0.445184	0.363379	0.31959	0.411304	-0.175458	0.340959	0.278344	0.363124
	Sample 104	0.552012	0.540872	0.287396	0.321114	0.299567	-0.225979	0.256043	0.43913	0.307908
	Sample 105	0.632115	0.57938	0.500127	0.175594	0.260972	-0.51537	0.0767092	0.373898	0.569878
	Sample 106	0.457882	0.531758	0.285041	0.217396	0.16044	-0.49275	0.199221	0.44659	0.300273
	Sample 107	0.549162	0.469057	0.542927	0.190464	0.378899	-0.375261	0.534912	0.18396	0.213573
	Sample 108	0.56574	0.497329	0.623679	0.334714	0.390024	-0.213439	0.130998	0.366695	0.43893
	Sample 109	0.547162	0.541319	0.589752	0.28425	0.336553	-0.310072	0.236444	0.534222	0.110242
	Sample 110	0.315964	0.550552	0.292137	0.29637	0.270541	-0.354416	0.428364	0.555925	0.0468737
	Sample 111	0.533219	0.493079	0.420893	0.328609	0.332528	-0.265882	0.254458	0.346266	0.361668
	Sample 112	0.5268	0.427443	0.514549	0.265345	0.357836	-0.254691	0.351595	0.295095	0.304265
	Sample 113	0.58092	0.48066	0.544971	0.352871	0.344492	-0.258962	0.572958	0.084929	0.275891
	Sample 114	0.648593	0.456896	0.596224	0.282138	0.371553	-0.264014	0.362583	0.359241	0.244122
	Sample 115	0.672695	0.493271	0.616512	0.284879	0.31456	-0.393654	0.312177	0.295534	0.415042
	Sample 116	0.48622	0.350463	0.595607	0.279349	0.395629	-0.255061	0.370313	0.416387	0.2241
	Sample 117	0.501756	0.600235	0.498724	0.2258	0.314564	-0.427846	0.489347	0.450539	0.0572281
	Sample 118	0.443493	0.580557	0.327767	0.199589	0.459571	-0.189401	0.0478521	0.379187	0.54767
	Sample 119	0.470657	0.432322	0.367656	0.240571	0.240042	-0.416302	0.46207	0.440198	0.107621
	Sample 120	0.453098	0.513139	0.409347	0.263349	0.333165	-0.305258	0.220484	0.470282	0.32273
	Sample 121	0.462895	0.46843	0.42812	0.216421	0.36198	-0.412621	0.0488319	0.493827	0.395411
	Sample 122	0.438942	0.509504	0.482139	0.243352	0.243928	-0.392225	0.318838	0.341571	0.282053
	Sample 123	0.444041	0.531926	0.446775	0.393068	0.280957	-0.292217	0.21299	0.520735	0.191269
	Sample 124	0.614139	0.538059	0.57098	0.203165	0.471862	-0.258871	0.257995	0.328643	0.417291
	Sample 125	0.630425	0.537067	0.481147	0.337257	0.259731	-0.339222	-0.00898739	0.706569	0.23599
	Sample 126	0.660526	0.50721	0.479301	0.365901	0.320422	-0.229166	0.270507	0.247377	0.552429
	Sample 127	0.512345	0.514516	0.515649	0.288881	0.302314	-0.34685	0.368664	0.4826	0.0843644
	Sample 128	0.514231	0.559669	0.452718	0.334809	0.307763	-0.307203	0.294069	0.100575	0.609572
	Sample 129	0.662313	0.597359	0.51254	0.228228	0.332841	-0.318765	0.180174	0.522039	0.200622
	Sample 130	0.523695	0.508376	0.629669	0.27769	0.435904	-0.262542	0.380202	0.298092	0.264754
	Sample 131	0.635325	0.614734	0.601304	0.431334	0.384706	-0.247257	0.419205	0.230806	0.131831
	Sample 132	0.435688	0.446352	0.427413	0.305049	0.263165	-0.306796	0.315935	0.413177	0.295622
	Sample 133	0.575797	0.559196	0.494078	0.382769	0.106189	-0.460242	0.206561	0.550029	0.212217
	Sample 134	0.579325	0.557531	0.537157	0.307271	0.300781	-0.334968	0.345847	0.54292	0.131167
	Sample 135	0.494364	0.454733	0.589923	0.438716	0.375709	-0.238031	0.524695	0.445208	0.0558879
	Sample 136	0.584912	0.468209	0.581186	0.183309	0.434057	-0.170412	0.187759	0.172848	0.572442
	Sample 137	0.546109	0.366727	0.540964	0.371714	0.428527	-0.169761	-0.04637	0.386904	0.638943
	Sample 138	0.499762	0.495972	0.560739	0.309483	0.193541	-0.350405	0.360985	0.250619	0.407624
	Sample 139	0.528823	0.555429	0.502177	0.341849	0.258704	-0.348422	0.232583	0.480258	0.235013
	Sample 140	0.571802	0.429811	0.512928	0.33397	0.408225	-0.251981	0.240902	0.242897	0.497969
	Sample 141	0.417077	0.538344	0.475434	0.210295	0.498214	-0.230537	0.545051	0.419417	0.043983
	Sample 142	0.579099	0.519637	0.442095	0.372316	0.287287	-0.373461	-0.0689138	0.601147	0.434857
	Sample 143	0.572517	0.544118	0.510508	0.251789	0.394321	-0.169554	0.537094	0.419264	0.0584423
	Sample 144	0.437134	0.43898	0.451951	0.22187	0.294692	-0.408266	0.147794	0.324198	0.473698
	Sample 145	0.445968	0.456994	0.488679	0.267095	0.25978	-0.431128	0.261456	0.488442	0.127999
	Sample 146	0.5739	0.539968	0.631755	0.254809	0.538575	-0.138968	0.412728	0.286166	0.234738
	Sample 147	0.549352	0.46453	0.5745	0.276692	0.320219	-0.272675	0.409254	0.279423	0.243125
	Sample 148	0.526405	0.437934	0.567031	0.229586	0.379842	-0.354146	0.474881	0.281579	0.252738
	Sample 149	0.483757	0.393886	0.440053	0.293583	0.355717	-0.287404	0.380666	0.286439	0.395446
	Sample 150	0.56726	0.575391	0.567658	0.326486	0.404595	-0.314451	0.483343	0.504181	-0.0623571
	Sample 151	0.599481	0.534437	0.595921	0.341637	0.193444	-0.377422	0.367229	0.325175	0.232761
	Sample 152	0.544877	0.418141	0.506618	0.236908	0.354151	-0.299806	0.452079	0.423509	0.201203
	Sample 153	0.43856	0.496881	0.477453	0.334739	0.278136	-0.282944	0.572388	0.184402	0.165989
	Sample 154	0.639558	0.593354	0.623272	0.293521	0.518646	-0.125617	0.248374	0.411193	0.396224
	Sample 155	0.498607	0.354732	0.553469	0.245958	0.338852	-0.328259	0.463236	0.297996	0.204987
	Sample 156	0.503543	0.468399	0.491062	0.326069	0.279143	-0.365749	0.340437	0.41107	0.231762
	Sample 157	0.596639	0.593479	0.545018	0.401325	0.162032	-0.363215	0.326374	0.219325	0.342975
	Sample 158	0.490861	0.487568	0.531499	0.382197	0.325403	-0.21761	0.372678	0.21946	0.313459
	Sample 159	0.562506	0.580683	0.481681	0.275192	0.38253	-0.25374	0.507436	0.419551	-0.0221498
	Sample 160	0.495663	0.479542	0.57954	0.255961	0.377384	-0.168339	0.43576	0.150611	0.340664
	Sample 161	0.504105	0.42398	0.542764	0.315702	0.328595	-0.269736	0.444381	0.515255	0.0816176
	Sample 162	0.581063	0.501154	0.638872	0.514291	0.356493	-0.130489	0.280464	0.289237	0.364293
	Sample 163	0.482441	0.506827	0.432701	0.336486	0.338889	-0.249314	0.217291	0.351971	0.349063
	Sample 164	0.557487	0.423448	0.559624	0.283554	0.36047	-0.246912	0.332833	0.409093	0.25966
	Sample 165	0.550617	0.603829	0.517413	0.398379	0.283303	-0.24725	0.115965	0.476994	0.311907
	Sample 166	0.47617	0.428487	0.418827	0.278309	0.24531	-0.301938	0.334356	0.236083	0.38609
	Sample 167	0.540439	0.456603	0.516413	0.261785	0.270764	-0.457459	0.435915	0.400895	0.160922
	Sample 168	0.59766	0.543356	0.560189	0.257171	0.319224	-0.356682	0.547295	0.300292	0.121588
	Sample 169	0.600075	0.509755	0.579577	0.228144	0.457964	-0.254198	0.502344	0.317678	0.140916
	Sample 170	0.489042	0.36317	0.530977	0.25262	0.371443	-0.21542	0.217919	0.492057	0.278593
	Sample 171	0.433684	0.488679	0.358324	0.248302	0.330995	-0.322752	0.296857	0.460843	0.183971
	Sample 172	0.549138	0.335128	0.527337	0.32232	0.244941	-0.202805	0.378872	0.174855	0.474884
	Sample 173	0.484087	0.479338	0.333631	0.250166	0.287477	-0.377682	0.256958	0.439619	0.292992
	Sample 174	0.458586	0.355762	0.46159	0.289747	0.388371	-0.234783	0.435863	0.41034	0.188431
	Sample 175	0.455951	0.528693	0.507615	0.152962	0.348701	-0.416323	0.323653	0.399871	0.240503
	Sample 176	0.447731	0.36822	0.520307	0.306028	0.222317	-0.393374	0.390464	0.396222	0.194786
	Sample 177	0.559903	0.501452	0.432519	0.298181	0.216781	-0.38339	0.386125	0.277421	0.344553
	Sample 178	0.580557	0.577286	0.565797	0.385204	0.282543	-0.336666	0.415795	0.224223	0.371343
	Sample 179	0.583386	0.497867	0.49782	0.316148	0.177552	-0.430885	0.21673	0.190088	0.555022
	Sample 180	0.534687	0.612478	0.394976	0.256724	0.210351	-0.482707	0.258752	0.461019	0.153474
	Sample 181	0.657679	0.424297	0.598074	0.340677	0.386953	-0.253181	0.506635	0.284234	0.235655
	Sample 182	0.501003	0.534287	0.429922	0.198059	0.352176	-0.45224	0.229742	0.601062	0.101996
	Sample 183	0.611703	0.48282	0.593655	0.345447	0.531967	-0.0908262	0.534852	0.323098	0.160462
	Sample 184	0.501397	0.485278	0.433992	0.29374	0.216404	-0.355689	0.178439	0.549605	0.248012
	Sample 185	0.649425	0.355006	0.544985	0.213049	0.422761	-0.322932	0.33425	0.400813	0.246411
	Sample 186	0.55457	0.506746	0.495031	0.35964	0.158001	-0.389779	-0.0604202	0.453413	0.52649
	Sample 187	0.58671	0.549906	0.514229	0.257013	0.35787	-0.38191	0.416312	0.300897	0.186723
	Sample 188	0.506893	0.466141	0.486712	0.216493	0.326415	-0.437912	0.166585	0.446577	0.374746
	Sample 189	0.590901	0.464354	0.440769	0.390969	0.401365	-0.125645	0.174718	0.349981	0.431839
	Sample 190	0.560724	0.527145	0.496122	0.310666	0.379433	-0.338775	0.155552	0.632106	0.181439
	Sample 191	0.601883	0.477929	0.637268	0.389938	0.356846	-0.241273	0.0334856	0.698584	0.175657
	Sample 192	0.599359	0.583306	0.512817	0.329559	0.386194	-0.247327	0.1804	0.22638	0.558444
	Sample 193	0.510337	0.475925	0.374758	0.298637	0.323521	-0.362226	0.136082	0.397597	0.390766
	Sample 194	0.484568	0.516074	0.570237	0.360249	0.305033	-0.28143	0.314803	0.534202	0.227475
	Sample 195	0.554308	0.472361	0.456914	0.278785	0.226669	-0.32659	0.188932	0.433012	0.38098
	Sample 196	0.595588	0.465536	0.513411	0.282635	0.490888	-0.250292	0.421267	0.385811	0.105219
	Sample 197	0.518546	0.329672	0.631065	0.435132	0.27367	-0.310931	0.0965145	0.484127	0.402738
	Sample 198	0.654008	0.642821	0.425884	0.165077	0.296598	-0.450857	0.0696435	0.479955	0.38698
	Sample 199	0.533315	0.45809	0.529963	0.172553	0.399918	-0.358753	0.402138	0.118884	0.445341
	Sample 200	0.625479	0.574034	0.58826	0.399489	0.213661	-0.361053	0.166401	0.34357	0.422063
	Sample 201	0.458138	0.421627	0.473938	0.249585	0.311283	-0.352227	0.160714	0.398279	0.335075
	Sample 202	0.538354	0.503033	0.515305	0.317518	0.278931	-0.389261	0.176723	0.411316	0.333495
	Sample 203	0.460907	0.468835	0.427284	0.303881	0.328361	-0.268983	0.307767	0.373365	0.106226
	Sample 204	0.648231	0.574471	0.525006	0.255971	0.399582	-0.255453	0.310773	0.513539	0.256863
	Sample 205	0.479891	0.288688	0.460251	0.349657	0.39987	-0.190995	0.259862	0.491175	0.222569
	Sample 206	0.594267	0.513292	0.535367	0.342598	0.290544	-0.329468	0.268934	0.392295	0.298183
	Sample 207	0.507398	0.452426	0.539163	0.369264	0.151932	-0.326443	-0.0665491	0.487382	0.469862
	Sample 208	0.568985	0.504245	0.50434	0.348207	0.353519	-0.323708	0.456392	0.415459	0.196984
	Sample 209	0.607063	0.549122	0.527785	0.320228	0.373664	-0.21189	0.175724	0.356644	0.43721
	Sample 210	0.559662	0.511718	0.503081	0.283391	0.19394	-0.284539	0.111959	0.423977	0.383681
	Sample 211	0.558972	0.44816	0.569065	0.338087	0.291684	-0.267405	0.285792	0.409896	0.205906
	Sample 212	0.54679	0.437624	0.476801	0.317544	0.30547	-0.260365	0.413547	0.250831	0.227909
	Sample 213	0.516405	0.596669	0.340822	0.409696	0.219951	-0.289518	0.378132	0.506674	0.0726928
	Sample 214	0.504598	0.442492	0.50648	0.234122	0.196786	-0.443148	0.179549	0.331025	0.411703
	Sample 215	0.531527	0.565727	0.389093	0.206525	0.431833	-0.29144	0.2695	0.487471	0.164904
	Sample 216	0.618818	0.646622	0.527049	0.385116	0.32785	-0.187917	0.0929156	0.543698	0.364113
	Sample 217	0.522794	0.513649	0.561266	0.290235	0.304993	-0.38835	0.481339	0.431676	0.202113
	Sample 218	0.503181	0.406493	0.562482	0.269097	0.433122	-0.222338	0.108379	0.621037	0.247925
	Sample 219	0.36468	0.465806	0.270541	0.255161	0.343832	-0.184242	0.171979	0.554427	0.267061
	Sample 220	0.5907	0.554452	0.506459	0.248386	0.379845	-0.433947	0.214731	0.382816	0.387101
	Sample 221	0.576441	0.518163	0.45718	0.166973	0.472398	-0.317269	0.333662	0.404365	0.283832
	Sample 222	0.428318	0.329866	0.447697	0.277749	0.409562	-0.222449	0.0260878	0.460969	0.489257
	Sample 223	0.484692	0.449016	0.548872	0.254025	0.451283	-0.248927	0.218464	0.428324	0.299418
	Sample 224	0.462167	0.472655	0.415341	0.384632	0.0886779	-0.434214	0.347929	0.420655	0.182703
	Sample 225	0.544937	0.549206	0.585985	0.33065	0.209767	-0.403132	0.273056	0.0964559	0.543376
	Sample 226	0.560177	0.448976	0.5849	0.320645	0.332725	-0.217695	0.418432	0.145674	0.411601
	Sample 227	0.59679	0.507457	0.489269	0.258349	0.271945	-0.461167	0.206549	0.408809	0.322135
	Sample 228	0.49306	0.467877	0.489414	0.145236	0.387894	-0.357694	0.194594	0.561516	0.24181
	Sample 229	0.508805	0.487266	0.45997	0.249512	0.320098	-0.192971	0.413428	0.330343	0.284703
	Sample 230	0.512769	0.460313	0.422414	0.431206	0.320438	-0.189206	0.200951	0.388714	0.415152
	Sample 231	0.533346	0.624132	0.509465	0.289026	0.329429	-0.263384	0.283008	0.539016	0.0506574
	Sample 232	0.533735	0.529351	0.441701	0.472409	0.254866	-0.322238	0.292105	0.513011	0.0265664
	Sample 233	0.560058	0.499284	0.435133	0.301901	0.411904	-0.210536	0.281528	0.248346	0.377735
	Sample 234	0.621839	0.585151	0.599999	0.319784	0.216881	-0.45275	0.377108	0.365715	0.165806
	Sample 235	0.483246	0.378886	0.498908	0.183532	0.481453	-0.149598	0.225412	0.248629	0.527157
	Sample 236	0.475098	0.547712	0.60425	0.31043	0.237523	-0.426679	0.251084	0.491094	0.111139
	Sample 237	0.538082	0.549379	0.460274	0.396499	0.16221	-0.323002	0.175156	0.264466	0.483492
	Sample 238	0.51988	0.51386	0.354514	0.305866	0.308328	-0.240697	0.344383	0.527065	0.0753608
	Sample 239	0.478596	0.443991	0.202617	0.426621	0.314907	-0.234923	0.188321	0.559115	0.239683
	Sample 240	0.562017	0.604502	0.454871	0.282173	0.392601	-0.306163	0.103344	0.444252	0.267248
	Sample 241	0.563588	0.576572	0.476335	0.243415	0.449126	-0.22076	0.286468	0.4486	0.142267
	Sample 242	0.569967	0.629128	0.437361	0.341694	0.314855	-0.289013	0.274504	0.404182	0.20642
	Sample 243	0.45418	0.480552	0.510311	0.150024	0.325367	-0.351619	0.341418	0.162955	0.460207
	Sample 244	0.609682	0.627691	0.486659	0.2964	0.419604	-0.254967	0.256001	0.393701	0.308449
	Sample 245	0.457697	0.351731	0.502553	0.328317	0.36828	-0.229679	0.198037	0.348625	0.454119
	Sample 246	0.464265	0.473008	0.449497	0.125149	0.337575	-0.423262	0.497968	0.37729	-0.0127588
	Sample 247	0.6357	0.512424	0.602132	0.322497	0.432576	-0.258267	0.252749	0.36612	0.30609
	Sample 248	0.530236	0.327223	0.516251	0.333605	0.277246	-0.283946	0.29855	0.310952	0.35144
	Sample 249	0.544162	0.533663	0.560216	0.413311	0.262254	-0.376885	0.147215	0.585388	0.228933
	Sample 250	0.562496	0.387721	0.522022	0.27132	0.352782	-0.295886	0.371004	0.546473	0.187685
	Sample 251	0.536721	0.507576	0.556061	0.266859	0.390486	-0.352271	0.5567	0.233538	0.198963
	Sample 252	0.497197	0.507638	0.469865	0.377966	0.312402	-0.243099	0.627802	0.201555	0.06134
	Sample 253	0.607115	0.451478	0.570509	0.324674	0.462266	-0.252791	0.249641	0.471899	0.299566
	Sample 254	0.573806	0.454109	0.535967	0.326238	0.368316	-0.304541	0.178889	0.265991	0.485371
	Sample 255	0.433976	0.438956	0.429201	0.221308	0.504622	-0.217463	0.296813	0.286153	0.396924
	Sample 256	0.589423	0.432114	0.524414	0.30227	0.39314	-0.286855	0.191314	0.249195	0.557966
	Sample 257	0.470624	0.476413	0.49554	0.177411	0.384592	-0.355077	0.223474	0.358636	0.327526
	Sample 258	0.568448	0.458778	0.489458	0.24048	0.405916	-0.173151	0.369243	0.399914	0.250097
	Sample 259	0.567181	0.488239	0.410741	0.407884	0.38437	-0.202998	0.493077	0.270361	0.270501
	Sample 260	0.496835	0.545009	0.452436	0.217563	0.326937	-0.424757	0.43153	0.552378	0.0501482
	Sample 261	0.55846	0.475008	0.628366	0.38399	0.365191	-0.191525	0.514041	0.411307	0.0171734
	Sample 262	0.489692	0.581825	0.419684	0.305715	0.381586	-0.246114	0.319937	0.57702	0.0536033
	Sample 263	0.451882	0.370031	0.430015	0.212572	0.199572	-0.270377	0.369009	0.25523	0.361886
	Sample 264	0.576696	0.507529	0.589017	0.255861	0.343829	-0.425388	0.298443	0.109917	0.555126
	Sample 265	0.500872	0.435338	0.473034	0.226501	0.501918	-0.201758	0.290353	0.344351	0.334967
	Sample 266	0.602518	0.571952	0.528417	0.244996	0.296749	-0.31447	0.255074	0.398339	0.279484
	Sample 267	0.523286	0.466872	0.458086	0.403275	0.363555	-0.214843	0.0894107	0.507142	0.294239
	Sample 268	0.557253	0.590984	0.402121	0.318424	0.258736	-0.400583	0.222378	0.578612	0.116416
	Sample 269	0.5265	0.424644	0.55499	0.136898	0.380367	-0.325581	0.00950204	0.483955	0.578662
	Sample 270	0.562424	0.454495	0.572023	0.215514	0.356807	-0.385594	0.450051	0.135741	0.333869
	Sample 271	0.375834	0.628404	0.311578	0.36135	0.304533	-0.243714	0.252336	0.513383	0.260036
	Sample 272	0.51818	0.48058	0.522006	0.287885	0.310584	-0.286773	0.72784	0.329393	-0.054556
	Sample 273	0.580531	0.653753	0.505112	0.312784	0.368834	-0.392136	0.386715	0.0854546	0.386599
	Sample 274	0.596781	0.574638	0.538599	0.348734	0.416369	-0.247054	0.222977	0.429056	0.256365
	Sample 275	0.61181	0.601962	0.523727	0.280002	0.404953	-0.36136	0.419051	0.358324	0.225844
	Sample 276	0.553023	0.371361	0.460971	0.285856	0.424259	-0.218471	-0.209522	0.631851	0.539424
	Sample 277	0.591669	0.416551	0.587193	0.253909	0.369509	-0.364219	0.285586	0.30552	0.301885
	Sample 278	0.521848	0.421041	0.435473	0.222615	0.302425	-0.366335	0.179342	0.263693	0.517958
	Sample 279	0.350639	0.550319	0.37718	0.349489	0.261009	-0.301664	0.285511	0.50718	0.174233
	Sample 280	0.557208	0.498891	0.478163	0.384061	0.269648	-0.20631	0.386698	0.418667	0.164708
	Sample 281	0.557123	0.507674	0.611006	0.300075	0.355531	-0.406189	0.385468	0.237021	0.283533
	Sample 282	0.550826	0.556102	0.416827	0.370611	0.313905	-0.303383	-0.124174	0.464369	0.509513
	Sample 283	0.539013	0.504903	0.437169	0.295435	0.349171	-0.256746	0.445998	0.279098	0.239578
	Sample 284	0.579527	0.354213	0.528865	0.300488	0.403856	-0.15605	0.399081	0.247656	0.35737
	Sample 285	0.576652	0.569937	0.51309	0.178366	0.242587	-0.50225	0.239199	0.408956	0.413206
	Sample 286	0.529349	0.602321	0.61535	0.312523	0.380178	-0.309563	0.408474	0.384616	0.172451
	Sample 287	0.52783	0.452836	0.58361	0.306273	0.354402	-0.297968	0.331144	0.507158	0.226292
	Sample 288	0.547404	0.611802	0.467207	0.47767	0.145251	-0.337236	0.16236	0.308792	0.483481
	Sample 289	0.429806	0.464122	0.326157	0.275739	0.486257	-0.246601	0.0867083	0.599055	0.275707
	Sample 290	0.437265	0.495711	0.415304	0.361887	0.25334	-0.308551	0.210907	0.555488	0.204511
	Sample 291	0.70908	0.543489	0.556855	0.210791	0.372428	-0.397106	0.162845	0.411982	0.28412
	Sample 292	0.611278	0.61284	0.581717	0.396573	0.403283	-0.163285	0.221312	0.347738	0.366765
	Sample 293	0.624922	0.508781	0.400145	0.356618	0.34589	-0.246089	0.108685	0.411437	0.392762
	Sample 294	0.630868	0.594097	0.538098	0.405034	0.306636	-0.327277	0.115335	0.38875	0.425092
	Sample 295	0.615755	0.581758	0.578855	0.296804	0.374581	-0.284645	0.311891	0.100874	0.408701
	Sample 296	0.529164	0.492495	0.35359	0.420432	0.16294	-0.327825	-0.0322642	0.380775	0.58549
	Sample 297	0.591426	0.578795	0.508436	0.348947	0.292849	-0.429875	0.344599	0.204038	0.390989
	Sample 298	0.500284	0.535377	0.323616	0.389582	0.301483	-0.258651	0.293146	0.494984	0.218099
	Sample 299	0.434929	0.46806	0.509715	0.251242	0.168947	-0.457967	0.403989	0.404766	0.123504
	Sample 300	0.497286	0.415622	0.52098	0.262227	0.224623	-0.410295	0.398119	0.342773	0.0494066
	Sample 301	0.620875	0.471576	0.566732	0.307052	0.39201	-0.170814	0.333348	0.261227	0.306966
	Sample 302	0.515932	0.563301	0.445849	0.32775	0.471674	-0.180586	0.303566	0.405911	0.222377
	Sample 303	0.433191	0.451394	0.459865	0.309176	0.469178	-0.174553	0.484232	0.25604	0.21054
	Sample 304	0.510061	0.530096	0.619928	0.258505	0.293877	-0.374823	0.309655	0.34885	0.243334
	Sample 305	0.414234	0.498628	0.49825	0.308959	0.287539	-0.392765	0.297619	0.201854	0.447729
	Sample 306	0.436525	0.482934	0.212349	0.238828	0.413191	-0.24705	0.368605	0.450588	0.150634
	Sample 307	0.392934	0.422629	0.309885	0.264437	0.195727	-0.407566	0.194653	0.557261	0.150551
	Sample 308	0.511719	0.520139	0.558338	0.248147	0.219953	-0.441502	0.491376	0.271816	0.213278
	Sample 309	0.430896	0.42977	0.412803	0.288955	0.326234	-0.244034	0.324878	0.495045	0.168477
	Sample 310	0.437711	0.402593	0.451894	0.149904	0.307161	-0.432531	0.408751	0.256539	0.325558
	Sample 311	0.588954	0.544743	0.528051	0.37053	0.242364	-0.35012	0.400004	0.086738	0.32145
	Sample 312	0.490266	0.478644	0.38799	0.321641	0.321341	-0.30398	0.321055	0.289391	0.384152
	Sample 313	0.527012	0.413381	0.489715	0.283975	0.366026	-0.258676	0.275031	0.61036	0.128859
[truncated: 50,537 more rows]
[truncated: 115 more columns]
